# Supplementary material for: Herpes zoster related healthcare burden and costs in immunocompromised (IC) and IC-free populations in England: an observational retrospective database analysis
Source: PubMed Central journal article supplement — BMJ Open. 2019 Aug 27;9(8):e023502. doi: 10.1136/bmjopen-2018-023502 (PMC6720472; doi:10.1136/bmjopen-2018-023502), 2019-08-27
Supplement: bmjopen-2018-023502.draft_revisions.pdf [file bmjopen-2018-023502.draft_revisions.pdf]

# BMJ Open

BMJ Open is committed to open peer review. As part of this commitment we make the peer review history of every article we publish publicly available.

When an article is published we post the peer reviewers' comments and the authors' responses online. We also post the versions of the paper that were used during peer review. These are the versions that the peer review comments apply to.

The versions of the paper that follow are the versions that were submitted during the peer review process. They are not the versions of record or the final published versions. They should not be cited or distributed as the published version of this manuscript.

BMJ Open is an open access journal and the full, final, typeset and author-corrected version of record of the manuscript is available on our site with no access controls, subscription charges or pay-per-view fees (<http://bmjopen.bmj.com>).

If you have any questions on BMJ Open's open peer review process please email [info.bmjopen@bmj.com](mailto:info.bmjopen@bmj.com)

# BMJ Open

## HERPES ZOSTER RELATED HEALTHCARE BURDEN AND COSTS IN IMMUNOCOMPROMISED (IC) AND IC-FREE POPULATIONS IN ENGLAND: AN OBSERVATIONAL RETROSPECTIVE DATABASE ANALYSIS

|                               |                                                                                                                                                                                                                                                                                                                                                                           |
|-------------------------------|---------------------------------------------------------------------------------------------------------------------------------------------------------------------------------------------------------------------------------------------------------------------------------------------------------------------------------------------------------------------------|
| Journal:                      | <i>BMJ Open</i>                                                                                                                                                                                                                                                                                                                                                           |
| Manuscript ID                 | bmjopen-2018-023502                                                                                                                                                                                                                                                                                                                                                       |
| Article Type:                 | Research                                                                                                                                                                                                                                                                                                                                                                  |
| Date Submitted by the Author: | 09-Apr-2018                                                                                                                                                                                                                                                                                                                                                               |
| Complete List of Authors:     | Curran, Desmond; GlaxoSmithKline, Value Evidence<br>Hunjan, Manjit; GlaxoSmithKline<br>El Ghachi, Amale; Aixial France; Hoffmann-La Roche Ltd<br>El-Hahi, Yassine; Valesta, Mechelen, Belgium c/o GSK, ;<br>Bianco, Veronique; GSK Vaccines, Research and Development Center<br>Ferreira, Germano; P-95 Epidemiology and pharmacovigilance services,<br>Heverlee, Belgium |
| Keywords:                     | Herpes zoster, postherpetic neuralgia, immunocompromized, hospitalization, healthcare burden, herpes zoster treatment                                                                                                                                                                                                                                                     |
|                               |                                                                                                                                                                                                                                                                                                                                                                           |

SCHOLARONE™  
Manuscripts

1  
2  
3  
4 **1 TITLE PAGE**

5  
6 **2 HERPES ZOSTER RELATED HEALTHCARE BURDEN AND COSTS IN**  
7  
8 **3 IMMUNOCOMPROMISED (IC) AND IC-FREE POPULATIONS IN ENGLAND: AN**  
9  
10 **4 OBSERVATIONAL RETROSPECTIVE DATABASE ANALYSIS**

11  
12  
13  
14 **5 Desmond Curran<sup>a</sup>, Manjit Hunjan<sup>b</sup>, Amale El Ghachi<sup>c</sup>, Yassine El Hahi<sup>d</sup>, Veronique**  
15  
16 **6 Bianco<sup>e</sup>, Germano Ferreira<sup>f</sup>**

17  
18  
19 **7 Affiliations**

20  
21  
22 <sup>a</sup>GSK, Wavre, Belgium; desmond.x.curran@gsk.com

23  
24 <sup>b</sup>GSK, Uxbridge, United Kingdom; manjit.k.hunjan@gsk.com

25  
26  
27 <sup>c</sup>AIXIAL, Boulogne-Billancourt, France c/o GSK, Wavre, Belgium; current affiliation F.

28  
29 Hoffmann-La Roche Ltd., Basel, Switzerland ; amale.el\_ghachi@roche.com

30  
31 <sup>d</sup>Valesta, Mechelen, Belgium c/o GSK, Wavre, Belgium; yassine.x.el-hahi@gsk.com

32  
33 <sup>e</sup>GSK, Rockville, Maryland, United States; veronique.x.bianco@gsk.com

34  
35  
36 <sup>f</sup>P-95 Epidemiology and pharmacovigilance services, Heverlee, Belgium; germano.ferreira@p-  
37  
38  
39 95.com

40  
41  
42 **16 Corresponding author**

43  
44  
45 Desmond Curran

46  
47 GSK, Avenue Fleming 20, 1300 Wavre, Belgium.

48  
49 Email: [desmond.x.curran@gsk.com](mailto:desmond.x.curran@gsk.com)

50  
51  
52  
53  
54  
55  
56  
57  
58  
59  
60

## 21 **ABSTRACT**

22 *[[298/300 words]]*

### 23 **Objective**

24 Individuals with immunocompromised (IC) conditions are at a higher risk of developing herpes  
25 zoster (HZ) than IC-free individuals. This study assessed the healthcare resource utilization  
26 (HCRU) burden and costs, of HZ in IC and IC-free individuals  $\geq 18$  years of age (YOA).

### 27 **Methods**

28 We conducted an observational retrospective study in a cohort of IC (N=621,588) and IC-free  
29 (N=621,588) individuals, matched by age, gender and GP practice region, contributing to the  
30 Clinical Practice Research Datalink database from 2000 to 2012 and linked to the Hospital  
31 Episode Statistics inpatient data. HCRU (i.e. primary and secondary care consultations, hospital  
32 inpatient stays, and treatment prescriptions) was analyzed from 7 days before to: (1) 30, (2) 365  
33 days after the HZ diagnosis date for individuals with (1) HZ only (no postherpetic neuralgia  
34 [PHN]) and (2) individuals with HZ and PHN only. Healthcare costs were computed by  
35 multiplying the number of units of resources utilized by the unit costs, summed across all HCRU  
36 categories to obtain a total cost per subject. Values were expressed in 2014 UK pound sterling (£)  
37 and presented for HZ cases overall, stratified by age (i.e. 18-49, 50-59, 60-69, 70-79 and  $\geq 80$   
38 YOA) and IC status.

### 39 **Results**

40 The percentage of HZ cases requiring hospitalization was higher in IC individuals (2.7% versus  
41 0.4% in IC and IC-free individuals aged 18-49 YOA, respectively and 9.5% versus 7.5% in IC

1  
2  
3 42 and IC-free individuals aged  $\geq 80$  YOA, respectively). Similarly, HZ-related mean treatment costs  
4  
5 43 per subject were higher in IC individuals (£189 *versus* £104 in IC and IC-free individuals aged  
6  
7 44 18-49 YOA, respectively and £557 *versus* £401 in IC and IC-free individuals aged  $\geq 80$  YOA,  
8  
9 45 respectively). Costs varied considerably by IC condition.  
10  
11  
12

## 13 46 **Conclusions**

14  
15  
16 47 Individuals with IC conditions, not only have a higher risk of HZ than IC-free individuals, but  
17  
18 48 also incur higher HZ-related healthcare costs.  
19  
20  
21 49

## 22 23 24 50 **Keywords**

25  
26  
27 51 Herpes zoster, postherpetic neuralgia, immunocompromized, hospitalization, healthcare burden,  
28  
29 52 herpes zoster treatment.  
30  
31  
32 53

## 54 STRENGTHS AND LIMITATIONS OF THIS STUDY

- 55 • The study is an observational retrospective descriptive study presenting the healthcare  
56 resource utilization and costs associated with HZ in both IC and IC-free populations aged  
57  $\geq 18$  years of age (YOA) in England.
- 58 • The IC population included 621,588 individuals who were registered in the Clinical  
59 Practice Research Datalink (CPRD) from January 2000 to March 2012 with  $\geq 12$ -month  
60 follow-up before being diagnosed with any of the selected 16 IC conditions and matched  
61 to the Hospital Episode Statistics (HES) database by age, gender and practice location to  
62 extract the IC-free population (N=621,588).
- 63 • The particularity of this study is that the design allowed calculation of IC condition  
64 prevalence rates, HZ incidence rates and occurrence of HZ-related healthcare utilization  
65 and costs at individual level in the same pre-defined population(s).
- 66 • This key study will provide data to be used in economic analyses to evaluate the value of  
67 vaccination in reducing the burden of HZ in IC populations.
- 68 • A limitation of the study is that the diagnoses were derived from administrative codes,  
69 which are recognized to be subject to miscoding or under-coding and are not validated  
70 against medical charts.

71

1  
2  
3 **72 LIST OF ABBREVIATIONS**  
4

5 73 £, 2014 UK pound sterling  
6  
7

8  
9 74 A&E, Accident and Emergency  
10

11  
12 75 AID, autoimmune diseases  
13  
14

15 76 ARDI, age-related decline in immunity  
16  
17

18 77 AT, Autoimmune Thyroiditis  
19  
20

21  
22 78 BNF, British National Formulary  
23  
24

25 79 CPRD, Clinical Practice Research Datalink  
26  
27

28 80 GP, General Practitioner  
29  
30

31 81 HCRU, healthcare resource utilization  
32  
33

34  
35 82 HES, Hospital Episode Statistics  
36  
37

38 83 HIV, human immunodeficiency virus  
39  
40

41 84 HM, hematological malignancies  
42  
43

44  
45 85 HSCT, hematopoietic stem cell transplantation  
46  
47

48 86 HZ, herpes zoster  
49  
50

51 87 HZ-Comp, HZ and complications with no PHN  
52  
53

54  
55 88 IC, immunocompromized  
56  
57

- 1  
2  
3 89 ICD-10, International Classification of Diseases-10<sup>th</sup> revision  
4  
5  
6 90 ISAC, Independent Scientific Advisory Committee  
7  
8  
9 91 PHN, postherpetic neuralgia  
10  
11  
12  
13 92 PSSRU, Personal Social Services Research Unit  
14  
15  
16 93 PY, person-years  
17  
18  
19 94 RA, rheumatoid arthritis  
20  
21  
22  
23 95 SLE, systemic lupus erythematosus  
24  
25  
26 96 SOT, solid organ transplantations  
27  
28  
29 97 UK, United Kingdom  
30  
31  
32  
33 98 US, United States  
34  
35  
36 99 VZV-CMI, varicella zoster virus cell-mediated immunity  
37  
38  
39 100 YOA, years of age  
40  
41  
42  
43 101 ZVL, zoster vaccine live  
44  
45  
46 102  
47  
48  
49  
50  
51  
52  
53  
54  
55  
56  
57  
58  
59  
60



## 103 INTRODUCTION

104 *[[2,819/4,000 words; 6/5 tables+figures but journal allow flexibility]]*

105 Varicella zoster virus cell-mediated immunity (VZV-CMI) inhibits the development of herpes  
106 zoster (HZ)<sup>1</sup>. Therefore, if for any reason VZV-CMI declines, the risk of HZ increases. Reasons  
107 for VZV-CMI decline can include, increasing age and immune suppression. VZV-CMI is not  
108 optimal in individuals with immunocompromized (IC) conditions and the age-specific incidence  
109 and severity of HZ greatly increases in IC patients due to underlying illness (e.g. human  
110 immunodeficiency virus [HIV] infection) or immunosuppressive therapies for autoimmune  
111 disease, malignancy, or organ transplantation<sup>2</sup>.

112 The incidence and severity of HZ is marked with an increase in people  $\geq 50$  years of age (YOA)  
113 due to an age-related decline in immunity (ARDI). In the United Kingdom (UK) the incidence of  
114 HZ rises from 7.1 per 1000 person-years (PY) among 60-64 year olds to 12.2 per 1000 PY among  
115 individuals aged  $\geq 85$  YOA<sup>3</sup>. Further to the impact of ARDI, a study by Forbes et al. in 2014  
116 investigated the increased risk for HZ in the UK population, associated with autoimmune  
117 conditions such as rheumatoid arthritis (RA), systemic lupus erythematosus (SLE); and chronic  
118 conditions such as diabetes mellitus, chronic obstructive pulmonary disease, chronic kidney  
119 disease, and asthma<sup>2</sup>. In addition to the increased risk of HZ in the various IC conditions these  
120 populations also experience increased severity of disease. In a study in Canada, Drolet et al.  
121 reported that individuals with an impaired immune status had HZ severity of illness scores, as  
122 measured by the Zoster Brief Pain Inventory, which were twice as high as individuals with  
123 normal immune function<sup>4,5</sup>. In a study in the United States (US), Yawn et al. reported that  
124 although 8% of HZ cases were in individuals who were immunocompromised, these individuals  
125 represented 23.8% of the total HZ-related costs<sup>6</sup>. The increase in healthcare costs was associated

1  
2  
3 126 with higher rates of postherpetic neuralgia (PHN) and non-pain complications in this group of  
4  
5 127 individuals<sup>6</sup>.

6  
7  
8 128 This study aims to estimate the healthcare resource utilization of HZ in selected IC populations  
9  
10 129 and in an IC-free (i.e., immunocompetent) population aged  $\geq 18$  YOA in England. The clinical  
11  
12 130 burden of disease epidemiological results of the study are reported elsewhere<sup>7</sup>. The prevalence of  
13  
14 131 IC conditions increased from 7.6% in individuals aged 18-44 YOA to 42.2% in individuals aged  
15  
16 132  $\geq 80$  YOA. The incidence rate of HZ in the IC cohort was 3.5/1000 PY in individuals aged 18-49  
17  
18 133 YOA increasing to 12.6/1000 PY in individuals aged  $\geq 80$  YOA. In this manuscript, we focus on  
19  
20 134 the healthcare resource utilization and costs associated with HZ in both IC and IC-free  
21  
22 135 populations.  
23  
24  
25  
26  
27

## 28 136 **METHODS**

29  
30 137 The study was conducted as an observational retrospective descriptive study (e-track number:  
31  
32 138 201615), in a cohort of eligible matched IC and IC-free populations (aged  $\geq 18$  YOA). The IC  
33  
34 139 population included individuals who were registered in the Clinical Practice Research Datalink  
35  
36 140 (CPRD) from January 2000 to March 2012 with  $\geq 12$ -month follow-up before being diagnosed  
37  
38 141 with any of the selected 16 IC conditions (See Supplemental Text). The CPRD IC population  
39  
40 142 cohort linked to the Hospital Episode Statistics (HES) database was matched to a cohort of HES  
41  
42 143 linked IC-free population (N=621,588), by age, gender and practice location. Individuals with a  
43  
44 144 missing date of IC diagnosis were excluded from the study population. Clinical diagnoses were  
45  
46 145 based on READ codes used in CPRD and with the International Classifications of Diseases-10<sup>th</sup>  
47  
48 146 revision (ICD-10) codes in the HES database.  
49  
50  
51  
52  
53  
54  
55  
56  
57  
58  
59  
60

1  
2  
3 147 The study protocol was approved by the Independent Scientific Advisory Committee (ISAC) for  
4  
5 148 the Medicines and Healthcare Products Regulatory Agency database research (ISAC protocol  
6  
7 149 number 14\_222R). The study was conducted in accordance with all applicable regulatory  
8  
9 150 requirements, with the Guidelines for Good Pharmacoepidemiology Practices<sup>8</sup>, all applicable  
10  
11 151 subject privacy requirements and the guiding principles of the Declaration of Helsinki.  
12  
13  
14

15 152 Healthcare resource data were extracted for IC and Matched IC-free HES-linked individuals who  
16  
17 153 were incident HZ cases during the study follow-up. Only reported records (resource utilization)  
18  
19 154 with available event dates during the individuals' eligibility period and those that occurred 7 days  
20  
21 155 before the initial HZ onset date, up to 365 days after the initial HZ onset date, were extracted.  
22  
23 156 Individuals who recorded the first PHN event date after 365 days post HZ event date were  
24  
25 157 excluded.  
26  
27  
28  
29

### 30 158 **Data sources**

31  
32  
33 159 Data were extracted from the following sources: (1) CPRD GOLD 2014Q3: Consultation,  
34  
35 160 Clinical, Therapy and Referral datasets; (2) HES Inpatient 2013Q3: HES\_DIAGNOSIS\_EPI  
36  
37 161 dataset; (3) HES Outpatient data (Set 9): Appointment and clinical datasets. Healthcare resource  
38  
39 162 utilization was defined as: HZ-treatment related prescribed medications (CPRD tbl:therapy);  
40  
41 163 Consultations and care provided by General Practitioners (GPs) or others in the GP practice  
42  
43 164 (CPRD tbl:consultations); HES secondary care outpatient visits (HES outpatient events); and  
44  
45 165 HES inpatient hospitalizations (HES inpatient events).  
46  
47  
48  
49

50 166 For each subject, healthcare costs stratified by subcategory of interest (HES Inpatient  
51  
52 167 Hospitalizations; HES Outpatient consultations/visits; CPRD Ambulatory Visits; CPRD Other  
53  
54 168 Ambulatory Visits; CPRD Prescriptions) were computed by multiplying units of resource use by  
55  
56  
57  
58  
59  
60

1  
2  
3 169 their unit costs. These were then summed over all resource use categories to obtain a total cost for  
4  
5 170 each subject. Values were expressed in 2014 UK pound sterling (£).  
6  
7

### 8 9 171 **Healthcare resource costs**

10  
11 172 For each subject, the cost of each prescription was calculated by merging the product code,  
12  
13 173 package type and prescribed quantity (prodcode-packtype-quantity) with the associated standard  
14  
15 174 package size and unit cost. The unit cost of a product in a prescription instance (i.e. one distinct  
16  
17 175 record in the CPRD therapy) was calculated using the cost described in the British National  
18  
19 176 Formulary (BNF), 2015 (as listed price if included or indicative price based on price in BNF).  
20  
21  
22  
23

24 177 Ambulatory visits included consultations with GPs and nurses in primary or community care.

25  
26 178 Visits included consultations at the practice or at the home of the patient, during working hours

27  
28 179 and out of hours. Consultations for which no clinical intervention was recorded were not included

29  
30 180 in the cost estimate for GP practice related healthcare utilization, for example: information

31  
32 181 technology data migration, administrative recording of received information. Administrative

33  
34 182 resource use in primary care was considered, including time on the phone, writing reports,

35  
36 183 referrals, etc. A referral to secondary care noted in a patient's record, *per se*, was not allocated the

37  
38 184 cost of the secondary care appointment. The most conservative option for the cost per unit as

39  
40 185 included in the Personal Social Services Research Unit (PSSRU) Costs of Health and Social

41  
42 186 Care, 2014 were applied e.g. GP consultation costs excluded qualification, direct staff care and

43  
44 187 travel costs<sup>9</sup>. Where specific costs for 2013/14 were not available, 2012/13 costs, were adjusted

45  
46 188 by applying the Hospital and Community Health Services inflation index<sup>9</sup>. Administration costs

47  
48 189 were based on unit costs as stated in the PSSRU, 2014.  
49  
50  
51  
52  
53  
54  
55  
56  
57  
58  
59  
60

1  
2  
3 190 Inpatient hospitalizations related to HZ were derived from HES data. Hospital Outpatient  
4  
5 191 resource utilization concerned HZ related referrals for non-inpatient hospital consultations,  
6  
7 192 derived from the HES Outpatient data. Additionally, visits to the Accident and Emergency  
8  
9 193 (A&E) department in hospitals were also recorded and costed. Inpatient hospitalization costs  
10  
11 194 were based on the average cost per episode using HES data for 2013/14 (calculated from the total  
12  
13 195 average payment by result spell cost and the average number of episodes per spell). Hospital  
14  
15 196 outpatient costs were sourced from National Tariff costs (2014) for specific consultant led  
16  
17 197 outpatient consultations; conservative costs were allocated i.e. wherever applicable costs for first  
18  
19 198 attendance by a single professional appointment were used<sup>10</sup>. Costs allocated to A&E visits were  
20  
21 199 based on the cost of a category 3 investigation with category 1-3 treatment<sup>10</sup>. Only events related  
22  
23 200 to HZ were costed out. Resources related to HZ complications were considered using ICD-10  
24  
25 201 Code B020.

26  
27  
28  
29  
30  
31 202 No costs were assigned to Referrals, Sick leave or Nursing home care/admission entries in  
32  
33 203 CPRD. Further details are provided in the Supplementary Text.

## 34 35 36 37 204 **RESULTS**

38  
39 205 The HES-linked matched IC and IC-free population cohorts (n=621,588 each) included  
40  
41 206 approximately 44% males and 56% females with a mean age of approximately 56 years. The age  
42  
43 207 distribution of matched cohorts was: 18-44 YOA (28.8%), 45-49 YOA (7.1%), 50-59 YOA  
44  
45 208 (17.2%), 60-64 YOA (9.9%), 65-69 YOA (9.4%), 70-79 YOA (16.6%), and  $\geq 80$  YOA (11.01%).

46  
47  
48  
49 209 The proportion of inpatient hospital admissions by age group for the HES-linked Matched IC and  
50  
51 210 IC-free cohorts over the time periods of 7 days prior to 90 days post initial HZ onset (Panel A) or  
52  
53 211 7 days prior to 365 days post initial HZ onset (Panel B) are presented in Figure 1. Hospital

1  
2  
3 212 admissions over the longer follow-up period of 7 days prior to 365 days post initial HZ onset  
4  
5 213 (Panel B) were similar to those of the shorter follow-up period (Panel A) over all age groups. The  
6  
7 214 percentage of HZ cases hospitalized were higher in IC individuals (e.g. in Panel B 2.7% *versus*  
8  
9 215 0.4% in IC and IC-free individuals aged 18-49 YOA, respectively and 9.5% *versus* 7.5% in IC  
10  
11 216 and IC-free individuals aged  $\geq 80$  YOA, respectively). Multiple HZ-related hospital visits were  
12  
13 217 reported for some individuals. As such, Table 1 presents the mean number of healthcare  
14  
15 218 resources utilized by IC Status, Age Group and Analysis period. The mean number of  
16  
17 219 hospitalizations per HZ case for the 365-day analysis was, 0.035 and 0.005 in IC and IC-free  
18  
19 220 individuals aged 18-49 YOA, respectively and 0.173 and 0.115 in IC and IC-free individuals  
20  
21 221 aged  $\geq 80$  YOA, respectively. A similar pattern of higher healthcare resource utilization with  
22  
23 222 increasing age and in IC individuals was observed for all resources for which costs were  
24  
25 223 assigned. A similar mean number of sick leave certificates were observed between the IC and the  
26  
27 224 IC-free cohorts with the mean decreasing with age. Nursing home care / admissions were only  
28  
29 225 recorded for individuals aged  $\geq 70$  YOA in CPRD.

30  
31 226 Figure 2 and Table 2 present the overall healthcare costs by HES-linked matched IC cohort and  
32  
33 227 age group for the analysis period 7 days prior to 365 days post initial HZ onset. The costs  
34  
35 228 increase with age and are consistently higher in the IC cohort compared with the IC-free cohort.  
36  
37 229 Although the absolute cost difference between IC and IC-free individuals increases with age from  
38  
39 230 £85.5 in individuals aged 18-49 YOA to £156.1 in individuals aged  $\geq 80$  YOA the relative  
40  
41 231 difference is higher in younger individuals (i.e. 75.8%-99.2% in  $< 70$  YOA) compared with older  
42  
43 232 individuals (i.e. 38.9%-57.6% in  $\geq 70$  YOA).

44  
45 233 Figure 3 presents the overall healthcare costs by each IC condition in the HES-linked matched IC  
46  
47 234 and IC-free cohort by age group for the analysis period 7 days prior to 365 days post initial HZ  
48  
49  
50  
51  
52

1  
2  
3 235 onset. For all IC conditions, the costs were higher than those for the IC-free group, in particular  
4  
5 236 for the hematopoietic stem cell transplantation (HSCT), hematological malignancies (HM) and  
6  
7 237 solid organ transplantations (SOT) conditions. In general, there was a similar trend of increasing  
8  
9 238 costs with increasing age-groups. A few outliers were observed due to small sample sizes. For  
10  
11 239 example, only 3 and 8 individuals aged  $\geq 70$  YOA were included in the HIV and HSCT groups,  
12  
13 240 respectively. Similarly, in total only 207 and 271 individuals with autoimmune thyroiditis (AT)  
14  
15 241 and SOT were included, respectively.  
16  
17  
18  
19

20 242 Table 3 presents the mean healthcare costs by IC status and HZ complication status. The mean  
21  
22 243 healthcare costs were approximately 4 to 5 times higher for individuals with PHN for the analysis  
23  
24 244 period 7 days prior to 365 days compared to individuals with HZ only. Similarly, mean  
25  
26 245 healthcare costs were approximately 2 to 4 times higher for individuals with HZ complications  
27  
28 246 compared to individuals with HZ only.  
29  
30  
31  
32

## 33 247 **DISCUSSION**

34  
35 248 In this study, we presented the healthcare resource utilization and costs associated with HZ in  
36  
37 249 both IC and IC-free populations. An important feature of this study was that the design enabled  
38  
39 250 the calculation of IC condition prevalence rates, HZ incidence rates and occurrence of HZ-related  
40  
41 251 healthcare utilization and costs at individual level in the same pre-defined population(s).  
42  
43  
44

45 252 Previous studies of healthcare costs of HZ in the UK, included a small study, which estimated the  
46  
47 253 mean healthcare costs per HZ subject, from an National Health Services perspective, of £85.6 and  
48  
49 254 £400.9 in individuals aged  $<65$  YOA and  $\geq 65$  YOA, respectively<sup>11</sup>. A later UK study that used  
50  
51 255 the HES and the health improvement network databases, estimated the mean cost of treating a HZ  
52  
53 256 patient to be £65.5 in the first month of diagnosis, with patients aged  $\geq 70$  YOA having a mean  
54  
55  
56  
57  
58  
59  
60

1  
2  
3 257 cost of £83 in the first month and £15.80 in months 2 and 3<sup>12</sup>. The costs of treating individuals  
4  
5 258 with PHN were much higher, i.e. mean cost per subject was estimated to be £921 in all  
6  
7 259 individuals and £909.60 in individuals aged  $\geq 70$  YOA<sup>12</sup>. Another study evaluated mean  
8  
9 260 healthcare costs (excluding hospitalization costs) to be £75.63 per HZ patient with mean direct  
10  
11 261 costs for treating PHN episodes (PHN pain occurring or persisting for 3 months) of £340.04<sup>13</sup>.  
12  
13  
14 262 These values augmented with hospitalization costs were used as inputs in a cost-effectiveness  
15  
16 263 model evaluating a HZ vaccine using the population of England and Wales<sup>3</sup>. The costs estimated  
17  
18 264 by van Hoek et al. are consistent with the values estimated in our study for IC-free individuals by  
19  
20 265 age group<sup>3</sup>.

21  
22  
23  
24  
25 266 In a previous study, mean prescription costs per HZ subject were reported to be £40.52<sup>13</sup>. In our  
26  
27 267 study, the mean prescription costs per HZ subject ranged from £19.7 to £40.8 depending on the  
28  
29 268 age group, IC status and analysis period included. Our study aimed to include only medications  
30  
31 269 considered to be directly related to HZ; i.e. excluded medications that may be linked to IC  
32  
33 270 conditions (e.g. aspirin, analgesic creams as they could be used primarily to reduce pain from  
34  
35 271 other conditions). This restriction and the introduction of generic versions of medications such as  
36  
37 272 acyclovir, gabapentin (and derivatives of gabapentin) which resulted in lower prices, contributed  
38  
39 273 to the reduced overall medication costs reported in this study.

40  
41  
42  
43  
44 274 In this analysis, costs of HZ only cases were assessed during the period 7 days prior to 30 days  
45  
46 275 post HZ onset, although it is recognized that HZ episodes can last for longer. The costs of PHN  
47  
48 276 were analyzed over 2 time-periods, i.e. (1) 7 days prior to 90 days post HZ onset and (2) 7 days  
49  
50 277 prior to 365 days post HZ onset. The rationale for the time periods studied was that using analysis  
51  
52 278 period 1 alone could lead to an underestimation of PHN costs whereas using analysis period 2  
53  
54 279 only could overestimate these costs. The most frequently used definition of PHN is: pain  
55  
56  
57  
58  
59  
60



1  
2  
3 280 persisting or appearing at least 90 days following rash onset. The median duration of PHN has  
4  
5 281 been reported to be 10.3 and 12.9 months in individuals aged  $\leq 69$  and  $\geq 70$  YOA respectively<sup>14</sup>,  
6  
7 282 and is likely to be longer in individuals who are immunocompromised<sup>5</sup>.  
8  
9

10  
11 283 The healthcare costs associated with PHN and complications were higher than those for  
12  
13 284 individuals with HZ only. However, as reported elsewhere, when considering the overall cost of  
14  
15 285 disease at a population level, the overall healthcare-associated cost is higher for HZ only<sup>15</sup>. This  
16  
17 286 is primarily a result of the higher incidence rates of HZ only.  
18  
19

20  
21 287 Few studies have investigated healthcare resource utilization and costs in IC individuals.  
22  
23 288 Schroder et al. carried out a study using the German Pharmacoepidemiological Research  
24  
25 289 Database , which consists of claims data from four statutory health insurances<sup>16</sup>. They reported  
26  
27 290 that during the quarter of the HZ diagnosis or during the two following quarters, 10% of all HZ  
28  
29 291 patients with an IC condition were hospitalized (with a HZ diagnosis), whereas among IC-free  
30  
31 292 HZ patients, 4.2% were hospitalized. White et al. reported that in their study using the US Market  
32  
33 293 Scan Research Database, direct medical costs were nearly twice as high in IC patients compared  
34  
35 294 with IC-free patients<sup>17</sup>. Li et al. carried out a study using the US Truven Health MarketScan  
36  
37 295 Commercial and Medicare Supplemental Insurance databases<sup>18</sup>. They concluded that patients  
38  
39 296 with the studied IC conditions (i.e. HIV, SOT, bone marrow or stem cell transplant, and cancer)  
40  
41 297 had significantly higher healthcare utilization and cost when developing HZ than their  
42  
43 298 comparable matches without HZ.  
44  
45  
46  
47  
48

49  
50 299 This study has several limitations. Diagnoses were derived from administrative codes, which are  
51  
52 300 recognized to be subject to miscoding or under-coding and are not validated against medical  
53  
54 301 charts. Increasing healthcare resource utilization and cost is likely to be related to increased  
55  
56  
57  
58

1  
2  
3 302 severity of IC conditions. In a study, Schroder et al. categorized individuals as low IC and high  
4  
5 303 IC<sup>16</sup>. However, insufficient details are recorded in the CPRD and HES databases to allow  
6  
7 304 adequate definition of patients' severity of immunosuppression e.g. laboratory parameters,  
8  
9  
10 305 immunosuppressive medication details such as chemotherapy. In addition, many IC individuals  
11  
12 306 had prescriptions that included more than one immunosuppressing medicine.  
13  
14

## 15 307 **CONCLUSION**

16  
17  
18 308 In conclusion, individuals with IC conditions incurred higher healthcare utilization and costs than  
19  
20 309 IC-free individuals. The current HZ vaccine which is licensed in the UK is a live vaccine (zoster  
21  
22 310 vaccine live [ZVL]), and is contraindicated for use in immunosuppressed or immunodeficient  
23  
24 311 individuals in whom administration of ZVL may result in disseminated disease<sup>2</sup>. New HZ  
25  
26 312 vaccines which may be used in IC populations are currently under development<sup>19 20</sup>. The results  
27  
28  
29 313 from this study could be used in economic analyses to evaluate the value of vaccination in  
30  
31 314 reducing the burden of HZ in these populations.  
32  
33  
34

## 35 315 **AUTHOR CONTRIBUTIONS**

36  
37 316 VB, AEG, YEH, GF, MH and DC participated in the conception and design of the study. VB,  
38  
39 317 AEG, YEH, GF and MH participated in the collection or generation of the study data. VB, AEG  
40  
41 318 and YEH performed the study. AEG, YEH, MH and DC contributed to the material. VB, AEG,  
42  
43  
44 319 YEH, GF, MH and DC were involved in the analysis or interpretation of the data. All named  
45  
46 320 authors provided substantial intellectual and scientific input during the manuscript development,  
47  
48 321 critically reviewing the content, revising the manuscript and giving final approval before  
49  
50 322 submission. The work described was carried out in accordance with the ICMJE recommendations  
51  
52 323 for conducting, reporting, editing and publishing scholarly work in medical journals. All authors  
53  
54 324 had full access to the data and gave final approval before submission.  
55  
56  
57  
58  
59  
60

## 325 **ACKNOWLEDGEMENTS**

326 The authors would like to thank Emmanuelle Espié, Yanni Emad, Morgane Guinnec, François  
327 Haguinet for their contribution to the study. They would also like to thank the Business &  
328 Decision Life Sciences platform for editorial assistance and coordination, on behalf of GSK.  
329 Gregory Collet coordinated manuscript development and editorial support. Kathleen Daly  
330 provided editing support.

## 331 **CONFLICTS OF INTEREST**

332 VB, MH and DC are employees of the GSK group of companies. DC and MH hold shares in the  
333 GSK group of companies. AEG and YEH have nothing to disclose. GF was employed by the  
334 GSK group of companies between 2012 and Feb 2015, during which the study was designed and  
335 implemented. Later, as an employee of P-95 epidemiology and pharmacovigilance, GF provided  
336 contracted consultancy services to the GSK group of companies for this and other GSK-  
337 sponsored studies. P-95 provides contracted services to the GSK group of companies, beyond the  
338 scope of this study.

## 339 **DATA SHARING STATEMENT**

340 All data used in this study are presented in the manuscript, references to the original material are  
341 provided. Please contact the corresponding author shall you require any additional information

## 342 **ETHICAL APPROVAL**

343 Approval was obtained from the Clinical Practice Research Datalink Independent Scientific  
344 Advisory Committee (14\_222R).

1  
2  
3 345 **FUNDING**  
4

5 346 GlaxoSmithKline Biologicals SA was the funding source and was involved in all study (GSK  
6  
7 347 study identifier: e-track number: 201615) activities and overall data management (collection,  
8  
9 348 analysis and interpretation). GlaxoSmithKline Biologicals SA also funded all costs associated  
10  
11 349 with the development and the publishing of the present manuscript. All authors had full access to  
12  
13  
14 350 the data and the corresponding author was responsible for submission of the publication.  
15  
16  
17  
18  
19  
20  
21  
22  
23  
24  
25  
26  
27  
28  
29  
30  
31  
32  
33  
34  
35  
36  
37  
38  
39  
40  
41  
42  
43  
44  
45  
46  
47  
48  
49  
50  
51  
52  
53  
54  
55  
56  
57  
58  
59  
60

351 **REFERENCES**

- 352 1. Oxman M. Zoster vaccine: current status and future prospects. *Clin Infect Dis* 2010;**51**(2):197-  
353 213.
- 354 2. Forbes HJ, Bhaskaran K, Thomas SL, et al. Quantification of risk factors for herpes zoster:  
355 population based case-control study. *BMJ* 2014;**348**:g2911.
- 356 3. van Hoek AJ, Gay N, Melegaro A. Estimating the cost-effectiveness of vaccination against  
357 herpes zoster in England and Wales. *Vaccine* 2009;**27**:1454-67.
- 358 4. Coplan PM, Schmader K, Nikas A, et al. Development of a measure of the burden of pain due  
359 to herpes zoster and postherpetic neuralgia for prevention trials: adaptation of the brief pain  
360 inventory. *J Pain* 2004;**5**(6):344-56.
- 361 5. Drolet M, Brisson M, Schmader K, et al. Predictors of postherpetic neuralgia among patients  
362 with herpes zoster: a prospective study. *J Pain* 2010;**11**(11):1211-21.
- 363 6. Yawn BP, Itzler RF, Wollan PC, et al. Health care utilization and cost burden of herpes zoster  
364 in a community population. *Mayo Clin Proc* 2009;**84**(9):787-94.
- 365 7. Yanni E, Ferreira G, El Hahi Y, et al. The burden of herpes zoster in 16 selected  
366 immunocompromised populations in England: a cohort study in the Clinical Practice Research  
367 Datalink 2000-2012. *BMJ Open* 2016;**[submitted]**.
- 368 8. International Society for Pharmacoepidemiology. Guidelines for Good Pharmacoepidemiology  
369 Practices (GPP). Secondary Guidelines for Good Pharmacoepidemiology Practices (GPP) 2015.  
370 [https://www.pharmacoepi.org/resources/guidelines\\_08027.cfm](https://www.pharmacoepi.org/resources/guidelines_08027.cfm).

- 1  
2  
3 371 9. Curtis LPSSRU. Unit costs of Health & Social Care 2014. Secondary Unit costs of Health &  
4  
5 372 Social Care 2014 2014. <http://www.pssru.ac.uk/project-pages/unit-costs/2014/>.  
6  
7  
8  
9 373 10. National Tariff Payment System. Annex 5A National Prices. Secondary Annex 5A National  
10  
11 374 Prices 2014/2015. [https://www.gov.uk/government/publications/national-tariff-payment-system-](https://www.gov.uk/government/publications/national-tariff-payment-system-2014-to-2015)  
12  
13 375 [2014-to-2015](https://www.gov.uk/government/publications/national-tariff-payment-system-2014-to-2015).  
14  
15  
16 376 11. Scott FT, Johnson RW, Leedham-Green M, et al. The burden of Herpes Zoster: a prospective  
17  
18 377 population based study. *Vaccine* 2006;**24**(9):1308-14.  
19  
20  
21  
22 378 12. Taieb V, Schwarzbard J, Butt T, et al. The Epidemiological and Cost Burden of Herpes  
23  
24 379 Zoster (Hz) and Post-Herpetic Neuralgia (Phn) in the UK. *Value Health* 2015;**18**(7):A589.  
25  
26  
27  
28 380 13. Gauthier A, Breuer J, Carrington D, et al. Epidemiology and cost of herpes zoster and post-  
29  
30 381 herpetic neuralgia in the United Kingdom. *Epidemiol Infect* 2009;**137**(1):38-47.  
31  
32  
33 382 14. Moore L, Remy V, Martin M, et al. A health economic model for evaluating a vaccine for the  
34  
35 383 prevention of herpes zoster and post-herpetic neuralgia in the UK. *Cost Eff Resour Alloc*  
36  
37 384 2010;**8**:7.  
38  
39  
40  
41 385 15. Gater A, Uhart M, McCool R, et al. The humanistic, economic and societal burden of herpes  
42  
43 386 zoster in Europe: a critical review. *BMC Public Health* 2015;**15**:193.  
44  
45  
46  
47 387 16. Schröder C, Enders D, Schink T, et al. Incidence of herpes zoster amongst adults varies by  
48  
49 388 severity of immunosuppression. *J Infect* 2017;**S0163-4453**(17):30228-1.  
50  
51  
52  
53  
54  
55  
56  
57  
58  
59  
60

- 1  
2  
3 389 17. White RR, Lenhart G, Singhal PK, et al. Incremental 1-Year Medical Resource Utilization  
4  
5 390 and Costs for Patients with Herpes Zoster from a Set of US Health Plans. *Pharmacoeconomics*  
6  
7 391 2009;**27**(9):781-92.
- 9  
10  
11 392 18. Li A, Chen SY, Burstin SJ, et al. Cost of Herpes Zoster in Patients With Selected Immune-  
12  
13 393 Compromised Conditions in the United States. *Open Forum Infect Dis* 2016;**3**(2):ofw067.
- 15  
16  
17 394 19. Lal H, Cunningham AL, Godeaux O, et al. Efficacy of an adjuvanted herpes zoster subunit  
18  
19 395 vaccine in older adults. *N Engl J Med* 2015;**372**(22):2087-96.
- 21  
22 396 20. Mullane KM, Winston DJ, Wertheim MS, et al. Safety and immunogenicity of heat-treated  
23  
24 397 zoster vaccine (ZVHT) in immunocompromised adults. *J Infect Dis* 2013;**208**(9):1375-85.

25  
26  
27  
28 398  
29  
30  
31  
32  
33  
34  
35  
36  
37  
38  
39  
40  
41  
42  
43  
44  
45  
46  
47  
48  
49  
50  
51  
52  
53  
54  
55  
56  
57  
58  
59  
60

399 **TABLES**

400 **Table 1 : Mean number of healthcare resources by IC status, age group and analysis**  
 401 **period**

|                              | IC cohort |         | IC-Free cohort |         |
|------------------------------|-----------|---------|----------------|---------|
|                              | 90 Day    | 365 Day | 90 Day         | 365 Day |
| HES Hospital admission       |           |         |                |         |
| 18-49                        | 0.035     | 0.035   | 0.005          | 0.005   |
| 50-59                        | 0.042     | 0.046   | 0.006          | 0.007   |
| 60-64                        | 0.053     | 0.055   | 0.009          | 0.010   |
| 65-69                        | 0.049     | 0.050   | 0.014          | 0.014   |
| 70-79                        | 0.072     | 0.076   | 0.029          | 0.030   |
| ≥80                          | 0.163     | 0.173   | 0.108          | 0.115   |
| HES Outpatient consultation  |           |         |                |         |
| 18-49                        | 0.095     | 0.116   | 0.041          | 0.045   |
| 50-59                        | 0.086     | 0.122   | 0.062          | 0.086   |
| 60-64                        | 0.136     | 0.180   | 0.065          | 0.078   |
| 65-69                        | 0.146     | 0.217   | 0.085          | 0.108   |
| 70-79                        | 0.165     | 0.267   | 0.113          | 0.181   |
| ≥80                          | 0.173     | 0.313   | 0.149          | 0.231   |
| CPRD Ambulatory visits       |           |         |                |         |
| 18-49                        | 2.816     | 3.168   | 2.186          | 2.360   |
| 50-59                        | 3.334     | 4.175   | 2.466          | 2.907   |
| 60-64                        | 3.733     | 5.081   | 2.598          | 3.115   |
| 65-69                        | 4.089     | 6.009   | 2.774          | 3.610   |
| 70-79                        | 4.534     | 6.959   | 3.413          | 4.767   |
| ≥80                          | 4.881     | 7.422   | 3.811          | 5.367   |
| CPRD Other ambulatory visits |           |         |                |         |



|    |                                     |       |       |       |       |
|----|-------------------------------------|-------|-------|-------|-------|
| 1  |                                     |       |       |       |       |
| 2  |                                     |       |       |       |       |
| 3  | 18-49                               | 0.319 | 0.411 | 0.155 | 0.170 |
| 4  |                                     |       |       |       |       |
| 5  | 50-59                               | 0.433 | 0.623 | 0.218 | 0.277 |
| 6  |                                     |       |       |       |       |
| 7  | 60-64                               | 0.545 | 0.885 | 0.251 | 0.360 |
| 8  |                                     |       |       |       |       |
| 9  | 65-69                               | 0.607 | 1.064 | 0.330 | 0.454 |
| 10 |                                     |       |       |       |       |
| 11 | 70-79                               | 0.686 | 1.251 | 0.417 | 0.722 |
| 12 |                                     |       |       |       |       |
| 13 | ≥80                                 | 0.860 | 1.616 | 0.668 | 1.183 |
| 14 |                                     |       |       |       |       |
| 15 | CPRD Prescriptions (All treatments) |       |       |       |       |
| 16 | 18-49                               | 1.247 | 1.363 | 0.890 | 0.931 |
| 17 |                                     |       |       |       |       |
| 18 | 50-59                               | 1.670 | 1.994 | 1.143 | 1.227 |
| 19 |                                     |       |       |       |       |
| 20 | 60-64                               | 1.969 | 2.602 | 1.379 | 1.489 |
| 21 |                                     |       |       |       |       |
| 22 | 65-69                               | 2.129 | 2.894 | 1.473 | 1.717 |
| 23 |                                     |       |       |       |       |
| 24 | 70-79                               | 2.310 | 3.295 | 1.814 | 2.347 |
| 25 |                                     |       |       |       |       |
| 26 | ≥80                                 | 2.405 | 3.743 | 1.844 | 2.575 |
| 27 |                                     |       |       |       |       |
| 28 | CPRD Referrals*                     |       |       |       |       |
| 29 | 18-49                               | 0.018 | 0.020 | 0.011 | 0.012 |
| 30 |                                     |       |       |       |       |
| 31 | 50-59                               | 0.021 | 0.026 | 0.018 | 0.022 |
| 32 |                                     |       |       |       |       |
| 33 | 60-64                               | 0.031 | 0.040 | 0.020 | 0.024 |
| 34 |                                     |       |       |       |       |
| 35 | 65-69                               | 0.031 | 0.044 | 0.015 | 0.023 |
| 36 |                                     |       |       |       |       |
| 37 | 70-79                               | 0.033 | 0.054 | 0.031 | 0.047 |
| 38 |                                     |       |       |       |       |
| 39 | ≥80                                 | 0.040 | 0.065 | 0.029 | 0.048 |
| 40 |                                     |       |       |       |       |
| 41 | CPRD Sick leave*                    |       |       |       |       |
| 42 | 18-49                               | 0.162 | 0.175 | 0.155 | 0.161 |
| 43 |                                     |       |       |       |       |
| 44 | 50-59                               | 0.156 | 0.178 | 0.173 | 0.182 |
| 45 |                                     |       |       |       |       |
| 46 | 60-64                               | 0.060 | 0.069 | 0.080 | 0.087 |
| 47 |                                     |       |       |       |       |
| 48 | 65-69                               | 0.017 | 0.017 | 0.008 | 0.008 |
| 49 |                                     |       |       |       |       |
| 50 | 70-79                               | 0.001 | 0.001 | 0.002 | 0.003 |
| 51 |                                     |       |       |       |       |
| 52 | ≥80                                 | 0.000 | 0.000 | 0.000 | 0.000 |
| 53 |                                     |       |       |       |       |
| 54 | CPRD Nursing home care/admission*   |       |       |       |       |
| 55 |                                     |       |       |       |       |
| 56 |                                     |       |       |       |       |
| 57 |                                     |       |       |       |       |
| 58 |                                     |       |       |       |       |
| 59 |                                     |       |       |       |       |
| 60 |                                     |       |       |       |       |

|       |       |       |       |       |
|-------|-------|-------|-------|-------|
| 18-69 | 0.000 | 0.000 | 0.000 | 0.000 |
| 70-79 | 0.001 | 0.001 | 0.001 | 0.001 |
| ≥80   | 0.004 | 0.004 | 0.003 | 0.003 |

---

402

403 \* No costs were assigned for CPRD Referrals, CPRD Sick leave, CPRD Nursing home care / admission

404 Abbreviations: IC, immunocompromized; HES, Hospital Episode Statistics; CPRD, Clinical Practice Research Datalink;

405 Costs were assigned for HES Hospital admission, HES Outpatient consultation, CPRD Ambulatory Visits, CPRD Other

406 Ambulatory Visits, CPRD Prescriptions.

407

For peer review only

1  
2  
3 **408 Table 2 : Mean cost (£) of healthcare resource utilization by IC status, age group and**  
4  
5  
6 **409 analysis period\***  
7

| Age groups (YOA) | Mean cost (£) |         |                |         |
|------------------|---------------|---------|----------------|---------|
|                  | IC cohort     |         | IC-free cohort |         |
|                  | 90 Day        | 365 Day | 90 Day         | 365 Day |
| 18-49            | 173.3         | 189.3   | 98.2           | 103.8   |
| 50-59            | 199.0         | 237.8   | 118.9          | 135.3   |
| 60-64            | 236.2         | 294.2   | 126.8          | 147.7   |
| 65-69            | 241.6         | 317.4   | 145.5          | 174.4   |
| 70-79            | 289.6         | 391.7   | 189.8          | 248.6   |
| ≥80              | 427.0         | 557.1   | 319.7          | 401.0   |

410

411 \* post initial HZ onset

412 Abbreviations: £: 2014 UK pound sterling; HZ: herpes zoster; IC, immunocompromized; YOA: years of age

413

414 **Table 3 : Mean cost (£) of healthcare resource utilization by IC status, age group,**  
 415 **analysis period and HZ complication status**

| Mean cost (£), IC      |          |                         |                          |                      |
|------------------------|----------|-------------------------|--------------------------|----------------------|
| Age groups<br>(YOA)    | HZ only* | PHN Day 90 <sup>#</sup> | PHN Day 365 <sup>1</sup> | HZ-Comp <sup>§</sup> |
| 18-49                  | 156.6    | 302.4                   | 746.6                    | 573.3                |
| 50-59                  | 168.1    | 468.0                   | 998.9                    | 562.6                |
| 60-64                  | 190.8    | 538.7                   | 1135.5                   | 780.5                |
| 65-69                  | 195.6    | 489.3                   | 1064.3                   | 551.8                |
| 70-79                  | 228.9    | 540.4                   | 1200.2                   | 847.5                |
| ≥80                    | 307.6    | 779.5                   | 1536                     | 1396.4               |
| Mean cost (£), IC-free |          |                         |                          |                      |
|                        | HZ only* | PHN Day 90 <sup>#</sup> | PHN Day 365 <sup>1</sup> | HZ-Comp <sup>§</sup> |
| 18-49                  | 91.6     | 216.1                   | 391.9                    | 246.4                |
| 50-59                  | 106.8    | 262.8                   | 540.8                    | 275.1                |
| 60-64                  | 114.1    | 270.5                   | 556.1                    | 192.7                |
| 65-69                  | 123.7    | 287.7                   | 595.5                    | 592.6                |
| 70-79                  | 149.2    | 388.2                   | 813.7                    | 511.5                |
| ≥80                    | 242.0    | 607.4                   | 1,182.8                  | 1,046.5              |

416  
 417 \* Individuals with HZ only (i.e. without PHN and complications): includes only costs 7 days prior to 30 days post initial HZ onset

418 # Individuals with HZ and PHN: includes only costs 7 days prior to 90 days post initial HZ onset

419 <sup>1</sup> Individuals with HZ and PHN: includes costs 7 days prior to 365 days post initial HZ onset

420 <sup>§</sup> Individuals with HZ and complications but no PHN: includes only costs 7 days prior to 30 days post initial HZ onset

421 Abbreviations: £: 2014 UK pound sterling; IC, immunocompromized; HZ: ,herpes zoster; PHN, postherpetic neuralgia; HZ-

422 Comp, HZ and complications with no PHN; YOA: years of age

423

1  
2  
3 424 **FIGURE**

4  
5 425 **Figure 1 : Inpatient Hospital Admission by HES-linked Matched IC or IC-free**  
6  
7  
8 426 **cohort over the time periods: 7 days prior to 90 days post initial HZ onset (Panel A)**  
9  
10 427 **and 7 days prior to 365 days post initial HZ onset (Panel B)**

11  
12  
13 428  
14  
15  
16 429 For HZ individuals without PHN: data from 7 days prior to 30 days post HZ onset included; For HZ individuals with PHN: data  
17 430 from 7 days prior until the following time periods after HZ onset included - 90 days (Panel A) and 365 days (Panel B)  
18 431 Abbreviations: HES, Hospital Episode Statistics; HZ, herpes zoster; IC, immunocompromised; PHN, postherpetic neuralgia  
19 432  
20  
21  
22 433

1  
2  
3 434 **Figure 2 : Healthcare Costs for by HES-linked Matched IC (Panel A) and IC-free**  
4  
5  
6 435 **cohort (Panel B) for the analysis period 7 days prior to 365 days post initial HZ onset**  
7

8  
9 436

10  
11 437 For HZ individuals without PHN: data from 7 days prior to 30 days post HZ onset included; For HZ individuals with PHN: data  
12 438 from 7 days prior until 365 days after HZ onset

13  
14 439 Abbreviations: £, 2014 UK pound sterling; CPRD, Clinical Practice Research Datalink; CPRD-Pre, CPRD Prescriptions; CPRD-  
15 440 OA, CPRD Other Ambulatory Visits; CPRD-Amb, CPRD Ambulatory Visits; HES, Hospital Episode Statistics; HES-Out,  
16 441 HES Outpatient consultation; HES-Hosp, HES Hospital admission; IC, immunocompromised; HZ, herpes zoster; PHN,  
17 442 postherpetic neuralgia;  
18  
19 443

1  
2  
3 444 **Figure 3 : Healthcare Costs for each IC condition in the HES-linked Matched IC**  
4  
5  
6 445 **and IC-free cohort by age group for the analysis period 7 days prior to 365 days post**  
7  
8 446 **initial HZ onset**  
9

10  
11 447

12  
13  
14 448 For HZ individuals without PHN: data from 7 days prior to 30 days post HZ onset included; For HZ individuals with PHN: data  
15 449 from 7 days prior until 365 days after HZ onset.

16 450 Abbreviations: £, 2014 UK pound sterling; AID, autoimmune diseases; AT, autoimmune thyroiditis; CORTDS, corticosteroid  
17 451 exposure; ESRD, end-stage renal disease; HES, Hospital Episode Statistics; HIV, human immunodeficiency virus; HM,  
18 452 hematological malignancies; HSCT, hematopoietic stem cell transplantation; HZ, herpes zoster; IBD, inflammatory bowel  
19 453 syndrome; IC, immunocompromised; MS, multiple sclerosis; PHN, postherpetic neuralgia; RA, rheumatoid arthritis; SLE,  
20 454 systemic lupus erythematosus; SOM, solid organ malignancies; SOT, solid organ transplantations; PSOR, psoriasis; OID,  
21 455 other immunodeficiency; OIT, other immunosuppressive therapy; PR, polymyalgia rheumatica;  
22  
23  
24

25 456  
26  
27  
28  
29  
30  
31  
32  
33  
34  
35  
36  
37  
38  
39  
40  
41  
42  
43  
44  
45  
46  
47  
48  
49  
50  
51  
52  
53  
54  
55  
56  
57  
58  
59  
60

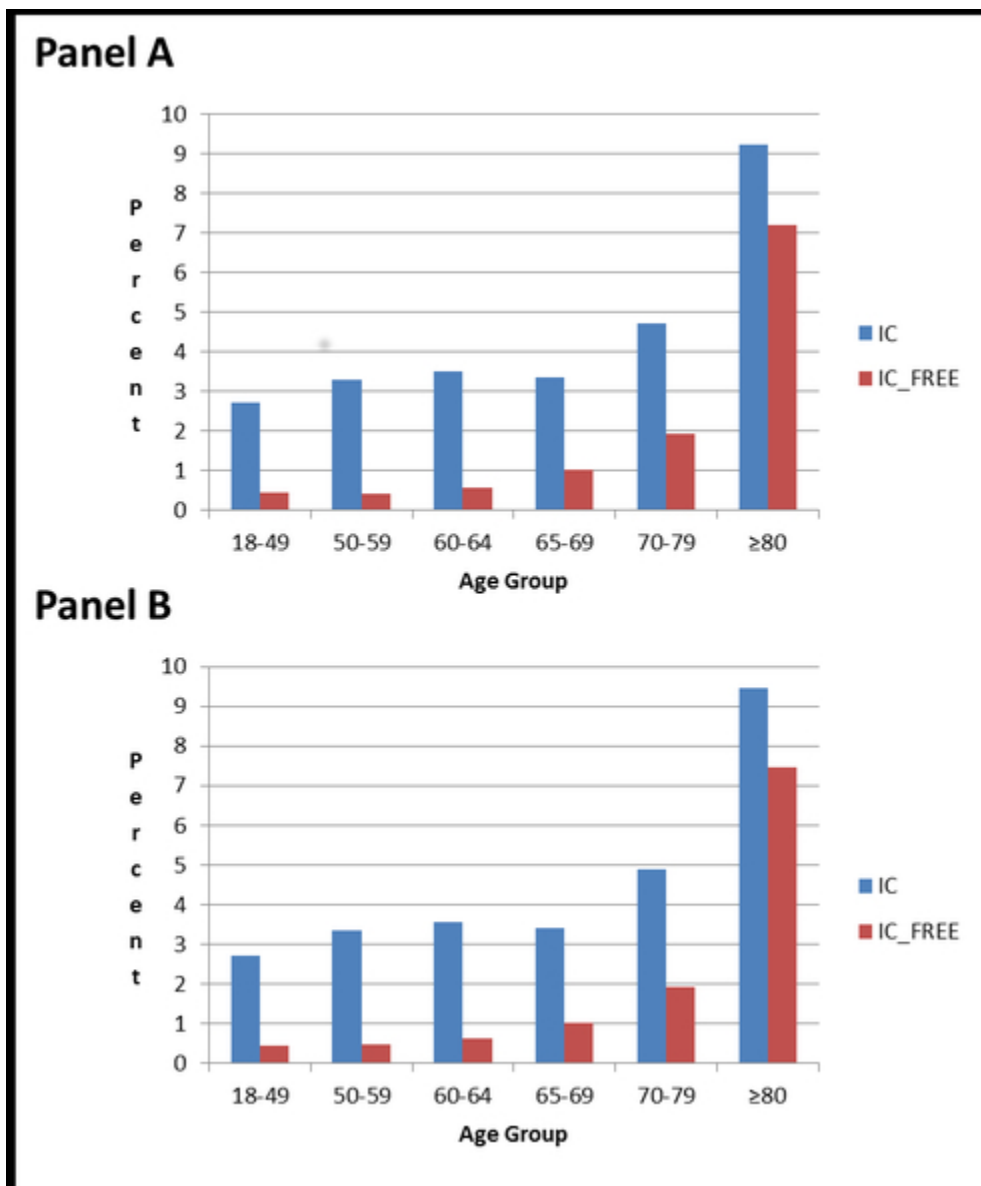

Figure 1

41x50mm (300 x 300 DPI)



1  
2  
3  
4  
5  
6  
7  
8  
9  
10  
11  
12  
13  
14  
15  
16  
17  
18  
19  
20  
21  
22  
23  
24  
25  
26  
27  
28  
29  
30  
31  
32  
33  
34  
35  
36  
37  
38  
39  
40  
41  
42  
43  
44  
45  
46  
47  
48  
49  
50  
51  
52  
53  
54  
55  
56  
57  
58  
59  
60

### Panel A

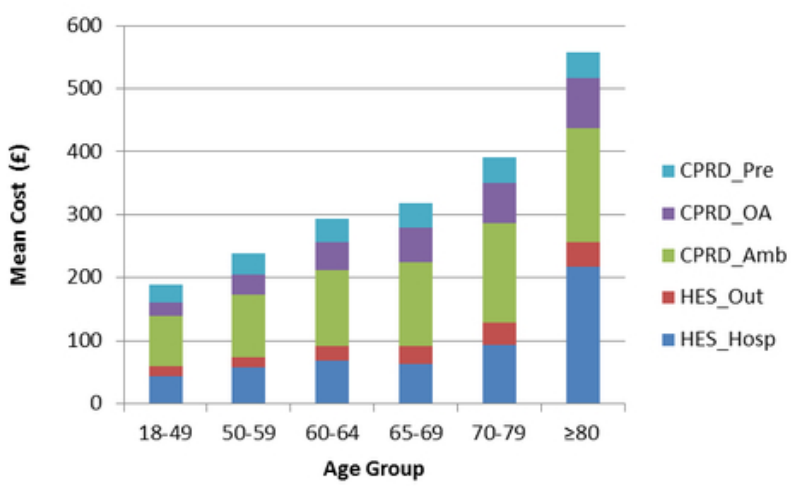

### Panel B

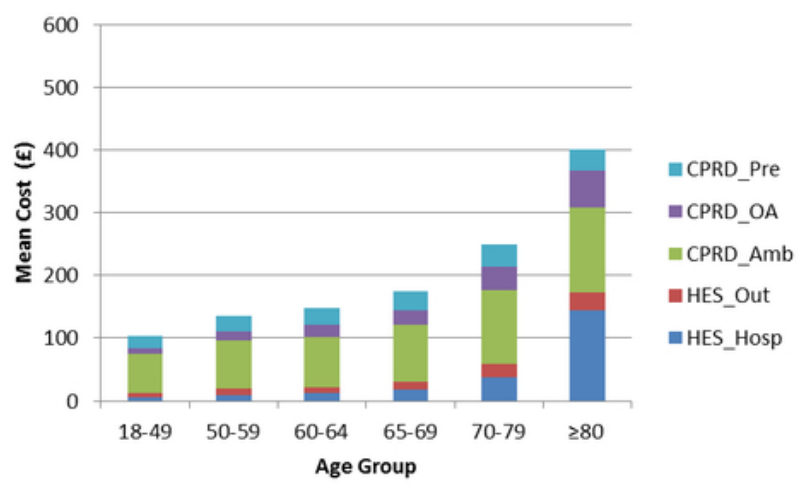

Figure 2

45x59mm (300 x 300 DPI)

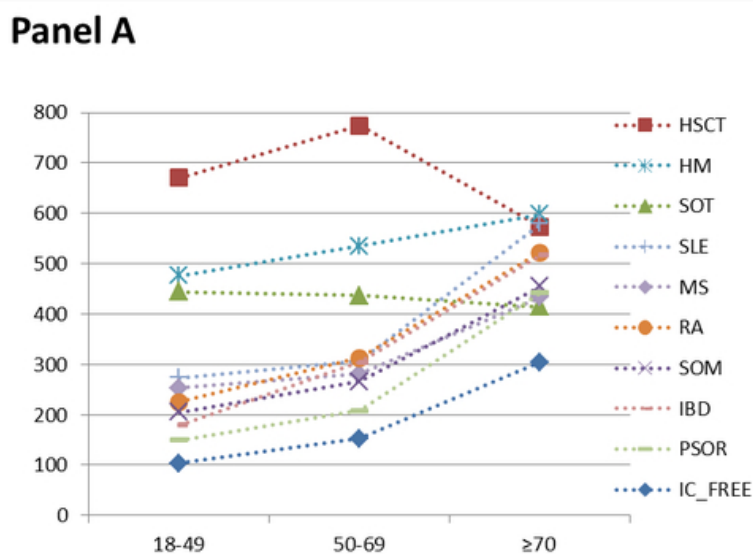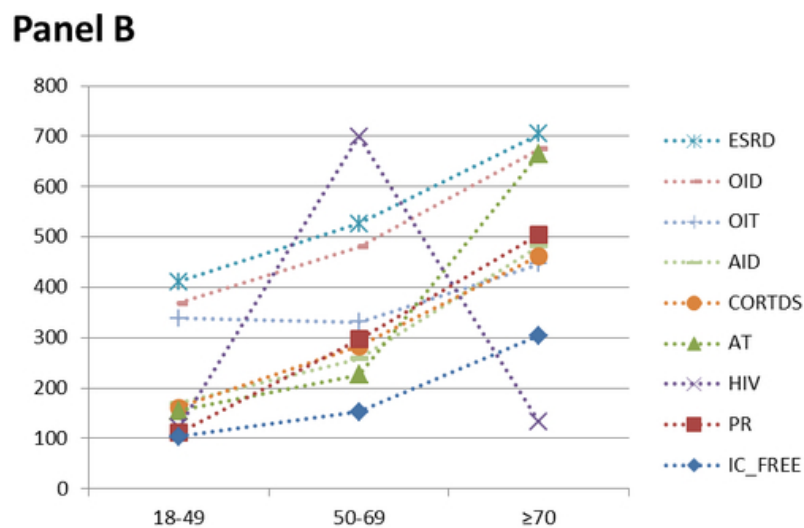

Figure 3

47x64mm (300 x 300 DPI)

1  
2  
3  
4  
5  
6  
7  
8  
9  
10  
11  
12  
13  
14  
15  
16  
17  
18  
19  
20  
21  
22  
23  
24  
25  
26  
27  
28  
29  
30  
31  
32  
33  
34  
35  
36  
37  
38  
39  
40  
41  
42  
43  
44  
45  
46  
47  
48  
49  
50  
51  
52  
53  
54  
55  
56  
57  
58  
59  
60

Supplementary Material

**HERPES ZOSTER RELATED  
HEALTHCARE BURDEN AND COSTS IN  
IMMUNOCOMPROMISED (IC) AND IC-  
FREE POPULATIONS IN ENGLAND: AN  
OBSERVATIONAL RETROSPECTIVE  
DATABASE ANALYSIS**

Desmond Curran, Manjit Hunjan, Amale El Ghachi, Yassine El  
Hahi, Veronique Bianco, Germano Ferreira

BMJ Open

## 18 IC Population

19 The immunocompromised (IC) population, referred to as the IC cohort hereafter, included eligible  
20 subjects reporting at least one of the following conditions or therapies at any time before 31<sup>st</sup> March  
21 2012:

- 22 • Hematopoietic stem cell transplant (HSCT);
- 23 • Solid organ transplantation (SOT);
- 24 • Solid organ malignancies (SOM);
- 25 • Hematological malignancies (HM): Leukemia, Lymphoma, Myeloma;
- 26 • Autoimmune diseases (AID):
  - 27 ○ Rheumatoid Arthritis (RA);
  - 28 ○ Systemic *Lupus erythematosus* (SLE);
  - 29 ○ Inflammatory Bowel Disease (IBD);
  - 30 ○ Psoriasis (PSOR);
  - 31 ○ Multiple sclerosis (MS);
  - 32 ○ Polymyalgia rheumatica (PR) and;
  - 33 ○ Autoimmune thyroiditis (AT).
- 34 • Human immunodeficiency virus (HIV);
- 35 • End-stage renal disease (ESRD);
- 36 • Corticosteroid exposure (CORTDS);
- 37 • Other immunosuppressive therapy (OIT) exposure;
- 38 • Other immunodeficiency (OID) conditions.

39 For autoimmune diseases, each disease was considered as a separate IC condition. Any subject with a  
40 code for any IC condition listed above at any time in their record was excluded from the IC-free  
41 cohort. Only subjects that were part of IC conditions based on treatment administration  
42 (“Corticosteroid exposure” and/or the “Other immunosuppressive therapy exposure” IC conditions)  
43 had an end of follow-up based on prescriptions and could present a gap of exposure in the IC cohort  
44 between the end of exposure in that IC condition and the beginning of the next one, if any, during  
45 which they could not be considered as IC.

## 46 **IC Matching**

47 The IC-free matched population included a random sample of the IC-free population described above  
48 matched to the subjects of the IC population with a ratio of 1:1 (IC: IC-free subjects) when possible.

49 The matching factors were:

- 50 • Hospital Episode Statistics (HES) linkage eligibility;
- 51 • The year of birth of the subject;
- 52 • The gender of the subject, and;
- 53 • The practice geographical region.

54 In addition, the IC-free subjects were included in the study at their corresponding matched IC  
55 subject's index date and should not have reported any history of HZ before the matched IC index  
56 date.

## 57 **Herpes Zoster (HZ) Diagnosis**

58 HZ cases identified in the Clinical Practice Research Datalink (CPRD) database were defined as  
59 subjects reporting at least one HZ-related READ code. Incident cases were subjects with at least 12  
60 months of active registration in CPRD and no past record of HZ diagnosis during at least 12 months  
61 prior to inclusion or even before in their available medical records. HZ cases were identified in HES  
62 using the International Classification of Diseases-10th revision (ICD-10) codes that appeared in the  
63 diagnosis fields. If HZ diagnosis codes were recorded in both HES and the CPRD, the earliest event  
64 date was considered as the onset date.

65 **Supplementary Table 1: Post-herpetic neuralgia**

| <b>Source:<br/>CPRD or HES</b> | <b>READ code/ICD-10 code</b> | <b>Complication</b>                          |
|--------------------------------|------------------------------|----------------------------------------------|
| CPRD                           | A531.11                      | Post-herpetic neuralgia                      |
| CPRD                           | A531200                      | Post-herpetic trigeminal neuralgia           |
| CPRD                           | A531300                      | Post-herpetic polyneuropathy                 |
| CPRD                           | A531500                      | Post-zoster neuralgia                        |
| CPRD                           | A531511                      | Post-herpetic neuralgia                      |
| CPRD                           | F300.00                      | Post-herpetic trigeminal neuralgia           |
| HES                            | B02.2                        | Zoster with other nervous system involvement |

66 CPRD, Clinical Practice Research Datalink; HES, Hospital Episode Statistics; ICD-10, International Classifications of  
67 Diseases-10<sup>th</sup> revision;

68

69 Complications (other than post-herpetic neuralgia [PHN]) were grouped into four main categories for  
70 the analyses:

- 71 • Neurological (other than PHN): i.e. HZ meningitis, HZ encephalitis, Ramsay - Hunt  
72 syndrome;
- 73 • Ocular HZ (i.e. HZ eyelid; HZ iridocyclitis, etc);
- 74 • Disseminated HZ;
- 75 • Other HZ complications (i.e. HZ otitis externa and unspecified complications).

76

77 **Healthcare costing**

- 78 • HZ subjects without PHN:

- 1  
2  
3 79      ○ Period = the HZ case onset date -7 prior to the case onset date + 30 days (a);  
4  
5  
6 80      ● HZ subjects reporting a PHN event within 365 days from the HZ case onset date, two  
7  
8 81      analyses periods were used:  
9  
10  
11 82      ○ Period 1 = the HZ case onset date -7 prior to the case onset date + 90 days (b);  
12  
13 83      ○ Period 2 = the HZ case onset date -7 prior to the case onset date + 365 days (c);  
14  
15

16 84      The analysis tables were generated for all HZ subjects from -7 days up to 90 and 365 days after HZ  
17 85      event; i.e. HZ + PHN 90 Days: (a) + (b), HZ + PHN 365 Days: (a) + (c).  
18

19 86  
20 87      Additionally, main categories of resource utilization and cost tables were presented for the following  
21 88      sub-populations for a 7-day period up to the case onset date up to 30 days, 90 days and 365 days  
22 89      post-initial HZ onset date:

- 23  
24 90      ● HZ only (i.e. no PHN and no HZ-related complication);  
25  
26 91      ● HZ and PHN within 1 year of HZ event;  
27  
28 92      ● HZ and other HZ-related complications but no PHN (overall and by complications  
29  
30 93      sub-categories:  
31  
32 94      ○ Neurological;  
33  
34 95      ○ Ocular;  
35  
36 96      ○ Cutaneous;  
37  
38 97      ○ Other complications.  
39  
40

41 98  
42 99      A detailed mapping linking the exact event definition variables and criteria to the reference unit cost  
43 100      was used. The unit costs for each type of resource were obtained from the following reference  
44 101      sources:

- 45  
46 102      ● General practitioner (GP) prescribed medication costs: British National Formulary  
47  
48 103      (BNF) 65 and 70. The quantity prescribed and pack type were used to estimate the  
49  
50 104      prescription costs for each drug (prodcode) of interest. A detailed mapping was used  
51  
52 105      to link the exact cost of prodcode quantity and packtype for each drug;  
53  
54  
55  
56  
57  
58  
59  
60

- 1  
2  
3 106 • Primary care costs: Personal Social Services Research Unit (PSSRU, Curtis L,  
4  
5 107 Personal Social Services Research Unit. Unit costs of Health & Social Care 2014.  
6  
7 108 University of Kent, 2014);  
8  
9 109 • HES inpatient hospitalisation and HES outpatient specialist costs: NHS Tariffs  
10  
11 110 (National Schedule of Reference Costs, 2013/2014).  
12  
13  
14  
15  
16  
17  
18  
19  
20  
21  
22  
23  
24  
25  
26  
27  
28  
29  
30  
31  
32  
33  
34  
35  
36  
37  
38  
39  
40  
41  
42  
43  
44  
45  
46  
47  
48  
49  
50  
51  
52  
53  
54  
55  
56  
57  
58  
59  
60

For peer review only



111 **Supplementary Table 2: List of medications**

| Treatment Groups          | Description   |
|---------------------------|---------------|
| Antiviral                 | Aciclovir     |
|                           | Famciclovir   |
|                           | Valacyclovir  |
| NSAIDs                    | Aspirin       |
|                           | Ibuprofen     |
| COX-2                     | Paracetamol   |
| Topical Agents            | Lidocaine     |
|                           | Capsaicin     |
| Anticonvulsants           | Gabapentin    |
|                           | Pregabalin    |
| Tricyclic antidepressants | Amitriptyline |
|                           | Nortriptyline |
|                           | Desipramine   |
| Corticosteroids           | Prednisolone  |
| Opioid analgesics         | Tramadol      |
|                           | Morphine      |
|                           | Oxycodone     |
|                           | Methadone     |

112

113 **Supplementary Table 3: Ambulatory and Outpatient Costs**

|                                                 | Consultation type             | Details                                                                                                                                                                                                                                   | Tariff Code | Cost |
|-------------------------------------------------|-------------------------------|-------------------------------------------------------------------------------------------------------------------------------------------------------------------------------------------------------------------------------------------|-------------|------|
| AMBULATORY<br>AND OTHER<br>AMBULATORY<br>VISITS | GP Surgery<br>Consultation    | Per patient contact lasting 11.7 minutes, without qualification costs, excluding direct care staff costs <sup>1</sup>                                                                                                                     | N/A         | £35  |
|                                                 | GP Clinic<br>Consultation     | Per patient contact lasting 17.2 minutes, without qualification costs, excluding direct care staff costs <sup>1</sup>                                                                                                                     | N/A         | £50  |
|                                                 | GP Telephone<br>Consultation  | Per patient contact lasting 7.1 minutes, without qualification costs, excluding direct staff care costs <sup>1</sup>                                                                                                                      | N/A         | £21  |
|                                                 | GP Home visit                 | Per out of surgery visit lasting 23.4 minutes (including 12 minutes travel) without qualification costs, excluding direct care staff costs <sup>2</sup><br><br>Inflated to 2014 prices using the HCHS annual price inflation <sup>1</sup> | N/A         | £87  |
|                                                 | GP Home visit out of<br>hours | Ratio of direct to indirect time; Out of surgery visits (home visits and clinics; includes travel time) - 1:0.99 <sup>2</sup>                                                                                                             | N/A         | £86  |

|                                        | Consultation type                     | Details                                                                                                                                                                                                                                | Tariff Code | Cost |
|----------------------------------------|---------------------------------------|----------------------------------------------------------------------------------------------------------------------------------------------------------------------------------------------------------------------------------------|-------------|------|
|                                        | GP Practice Nurse Consultation        | Per 15.5 minute surgery consultation @ £44/hour (excluding qualification costs) <sup>1</sup>                                                                                                                                           | N/A         | £11  |
|                                        | GP Results by Phone                   | Assume same as GP Telephone Consultation<br>Per patient contact lasting 7.1 minutes, without qualification costs, excluding direct staff care costs <sup>1</sup>                                                                       | N/A         | £21  |
|                                        | GP Time spent on phone/writing letter | Ratio of direct to indirect time; Face-to-face time (excludes travel time). Using cost of GP consultation in surgery <sup>1</sup>                                                                                                      | N/A         | £23  |
|                                        | GP Time on administration             | Ratio of direct to indirect time; Face-to-face time (excludes travel time). Using cost of GP consultation in surgery <sup>1</sup>                                                                                                      | N/A         | £8   |
| AMBULATORY AND OTHER AMBULATORY VISITS | District Nurse Visit                  | Mean average cost for a face-to-face contact in district nursing services (based on NHS reference costs) was £39 in 2012/2013 <sup>2</sup><br>Hospital and community health services annual price inflation for 2013/2014 <sup>1</sup> | N/A         | £40  |

|                                      | Consultation type                          | Details                                                                                                                                                                                                                                       | Tariff Code | Cost |
|--------------------------------------|--------------------------------------------|-----------------------------------------------------------------------------------------------------------------------------------------------------------------------------------------------------------------------------------------------|-------------|------|
|                                      | Health visitor Visit                       | Mean average cost for a face-to-face contact in health visiting services (based on NHS reference costs) was £51 in for 2012/2013 <sup>2</sup><br><br>Hospital and community health services annual price inflation for 2013/2014 <sup>1</sup> | N/A         | £52  |
| OUTPATIENT<br>HOSPITAL<br>ATTENDANCE | Anaesthetics,<br>Outpatient Attendance     | Consultant Led; WF01B: First attendance Single professional <sup>3</sup>                                                                                                                                                                      | 190         | £125 |
|                                      | Dermatology,<br>Outpatient Attendance      | Consultant Led; WF01B: First attendance Single professional <sup>3</sup>                                                                                                                                                                      | 330         | £104 |
|                                      | General Medicine,<br>Outpatient Attendance | Consultant Led; WF01B: First attendance Single professional <sup>3</sup>                                                                                                                                                                      | 300         | £178 |
|                                      | Ophthalmology,<br>Outpatient Attendance    | Consultant Led; WF01B: First attendance Single professional <sup>3</sup>                                                                                                                                                                      | 130         | £119 |

1  
2  
3  
4  
5  
6  
7  
8  
9  
10  
11  
12  
13  
14  
15  
16  
17  
18  
19  
20  
21  
22  
23  
24  
25  
26  
27  
28  
29  
30  
31  
32  
33  
34  
35  
36  
37  
38  
39  
40  
41  
42  
43  
44  
45  
46  
47

|  | <b>Consultation type</b>                  | <b>Details</b>                                                    | <b>Tariff Code</b> | <b>Cost</b> |
|--|-------------------------------------------|-------------------------------------------------------------------|--------------------|-------------|
|  | A&E Attendance                            | Category 3 investigation with category 1-3 treatment <sup>3</sup> | VB03Z              | £163        |
|  | Pain Management,<br>Outpatient Attendance | Consultant led - Outpatient Attendance <sup>4</sup>               | 191                | £138        |

For peer review only

|                                      | Consultation type                             | Details                                             | Tariff Code | Cost |
|--------------------------------------|-----------------------------------------------|-----------------------------------------------------|-------------|------|
| OUTPATIENT<br>HOSPITAL<br>ATTENDANCE | Neurosurgery,<br>Outpatient Attendance        | Consultant led - Outpatient Attendance <sup>4</sup> | 150         | £182 |
|                                      | Palliative Medicine,<br>Outpatient Attendance | Consultant led - Outpatient Attendance <sup>4</sup> | 315         | £167 |
|                                      | Neurology, Outpatient<br>Attendance           | Consultant led - Outpatient Attendance <sup>4</sup> | 400         | £174 |

114 GP, General Practitioner; N/A, not available; NHS, National Health Service; HCHS, community health services; A&E, accident and emergency;

115 Source:

- 116 1. Curtis L, Personal Social Services Research Unit. Unit costs of Health & Social Care 2014. University of Kent, 2014.
- 117 2. Curtis L, Personal Social Services Research Unit. Unit costs of Health & Social Care 2013. University of Kent, 2013
- 118 3. 2014/5 National Tariff Payment System. Annex 5A National Prices, 17 December 2013
- 119 <https://www.gov.uk/government/publications/national-tariff-payment-system-2014-to-2015>
- 120 4. National Schedule of Reference costs 2013-14
- 121 [https://www.gov.uk/government/uploads/system/uploads/attachment\\_data/file/397469/03a\\_2013-14\\_National\\_Schedule\\_-\\_CF-](https://www.gov.uk/government/uploads/system/uploads/attachment_data/file/397469/03a_2013-14_National_Schedule_-_CF-NET_updated.xls)
- 122 [NET\\_updated.xls](https://www.gov.uk/government/uploads/system/uploads/attachment_data/file/397469/03a_2013-14_National_Schedule_-_CF-NET_updated.xls)

124 **Supplementary Table 4: Hospital Inpatient costs**

| Diagnosis Code | Detail                                  | Average tariff per admission |
|----------------|-----------------------------------------|------------------------------|
| B020           | Zoster encephalitis                     | £5,038.39                    |
| B021           | Zoster meningitis                       | £2,065.47                    |
| B022           | Zoster other nervous system involvement | £1,440.48                    |
| B023           | Zoster with ocular diseases             | £2,226.36                    |
| B027           | Disseminated Zoster                     | £2,255.30                    |
| B028           | Zoster with other complications         | £2,060.70                    |
| B029           | Zoster without complications            | £1,790.57                    |

125 Source: Hospital Episode Statistics (HES) Admission data IMS, 2013/14

126

127 **HZ treatment prescriptions**

128 All HZ treatment prescriptions, defined according to British National Formulary (BNF) indication and  
 129 clinical expert input, were identified by product codes from the HZ TREATMENT CPRD Prodcodes List,  
 130 and were extracted from the CPRD Therapy dataset.

131

132 **Analysis datasets used**

133 HZ treatments prescriptions (CPRD Therapy dataset);  
 134 CPRD Ambulatory Visits (CPRD Consultation dataset);  
 135 Specialists Referrals by GP (CPRD Referral dataset);  
 136 Hospitalizations (HES Inpatient: HES\_DIAGNOSIS\_EPI dataset);  
 137 Outpatient Visits (HESOP Clinical dataset);  
 138 Nursing home visits and Time off sick (CPRD Clinical dataset);

139

140 **Supplementary Table 5: Costs by Category, IC Status, Time period of Analysis**  
 141 **and Age Groups**

| Category                               | 18-49<br>YOA | 50-59<br>YOA | 60-64<br>YOA | 65-69<br>YOA | 70-79<br>YOA | ≥80<br>YOA   |
|----------------------------------------|--------------|--------------|--------------|--------------|--------------|--------------|
| <b>IC Population (≤90 days)</b>        |              |              |              |              |              |              |
| Hospitalizations                       | 44.2         | 52.4         | 66.7         | 61.2         | 89.3         | 205.5        |
| HES Outpatient<br>consultations/visits | 12.4         | 11.2         | 17.8         | 18.6         | 21           | 21.3         |
| CPRD Ambulatory Visits                 | 72.9         | 82.3         | 92.1         | 97.5         | 110.8        | 126.5        |
| CPRD Other Ambulatory Visits           | 16.1         | 22           | 27.7         | 31           | 34.6         | 41.8         |
| CPRD Prescriptions                     | 27.6         | 31.1         | 31.9         | 33.3         | 33.9         | 31.9         |
| <b>Total</b>                           | <b>173.2</b> | <b>199.0</b> | <b>236.2</b> | <b>241.6</b> | <b>289.6</b> | <b>427.0</b> |
| <b>IC Population (≤365 days)</b>       |              |              |              |              |              |              |
| Hospitalizations                       | 44.2         | 56.7         | 68           | 62.4         | 93.8         | 216.5        |
| HES Outpatient<br>consultations/visits | 15.1         | 16.1         | 23.9         | 28.1         | 34.4         | 40.1         |
| CPRD Ambulatory Visits                 | 80.6         | 100.1        | 120.2        | 134.5        | 158.1        | 180.8        |
| CPRD Other Ambulatory Visits           | 20.7         | 31.6         | 44.9         | 54.4         | 63.2         | 78.8         |



|                                       |              |              |              |              |              |              |
|---------------------------------------|--------------|--------------|--------------|--------------|--------------|--------------|
| CPRD Prescriptions                    | 28.7         | 33.3         | 37.3         | 38.1         | 42.2         | 40.8         |
| <b>Total</b>                          | <b>189.3</b> | <b>237.8</b> | <b>294.2</b> | <b>317.4</b> | <b>391.7</b> | <b>557.0</b> |
| <b>IC-Free Population (≤90 days)</b>  |              |              |              |              |              |              |
| Hospitalizations                      | 6.3          | 8.5          | 11.5         | 17.5         | 36.4         | 136.5        |
| HES Outpatient consultations/visits   | 5.2          | 7.8          | 8.2          | 10.4         | 13.9         | 18.2         |
| CPRD Ambulatory Visits                | 59           | 66.7         | 69.6         | 72.7         | 88.8         | 102.8        |
| CPRD Other Ambulatory Visits          | 8            | 11.2         | 12.9         | 16.9         | 21.2         | 32.8         |
| CPRD Prescriptions                    | 19.7         | 24.7         | 24.6         | 28           | 29.4         | 29.4         |
| <b>Total</b>                          | <b>98.2</b>  | <b>118.9</b> | <b>126.8</b> | <b>145.5</b> | <b>189.7</b> | <b>319.7</b> |
| <b>IC-Free Population (≤365 days)</b> |              |              |              |              |              |              |
| Hospitalizations                      | 6.3          | 8.9          | 12           | 17.9         | 37           | 144          |
| HES Outpatient consultations/visits   | 5.7          | 10.8         | 10           | 13.4         | 22.7         | 28.4         |
| CPRD Ambulatory Visits                | 63           | 75.8         | 80.4         | 90           | 117.3        | 135.9        |
| CPRD Other Ambulatory Visits          | 8.8          | 14.2         | 18.6         | 23.2         | 36.8         | 58.7         |
| CPRD Prescriptions                    | 20           | 25.6         | 26.8         | 29.9         | 34.9         | 34.1         |
| <b>Total</b>                          | <b>103.8</b> | <b>135.3</b> | <b>147.7</b> | <b>174.4</b> | <b>248.6</b> | <b>401.0</b> |

1  
2  
3 142 HES, Hospital Episode Statistics; IC, immunocompromised; CPRD, Clinical Practice Research Datalink; CPRD; YOA, years  
4 143 of age  
5  
6  
7  
8  
9  
10  
11  
12  
13  
14  
15  
16  
17  
18  
19  
20  
21  
22  
23  
24  
25  
26  
27  
28  
29  
30  
31  
32  
33  
34  
35  
36  
37  
38  
39  
40  
41  
42  
43  
44  
45  
46  
47  
48  
49  
50  
51  
52  
53  
54  
55  
56  
57  
58  
59  
60

For peer review only

1  
2  
3 144 **Supplementary Figure 1: Healthcare costs for by HES-linked matched IC (Panel**  
4  
5 145 **A) and IC-free cohort (Panel B) for the analysis period 7 days prior to 90 days**  
6  
7 146 **post initial HZ onset**  
8  
9

10 147 **Panel A**

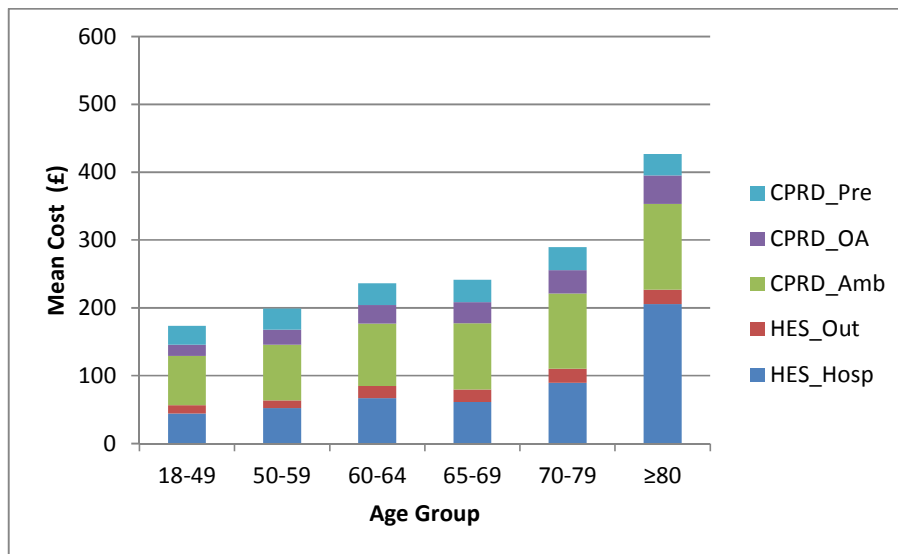

148

149 **Panel B**

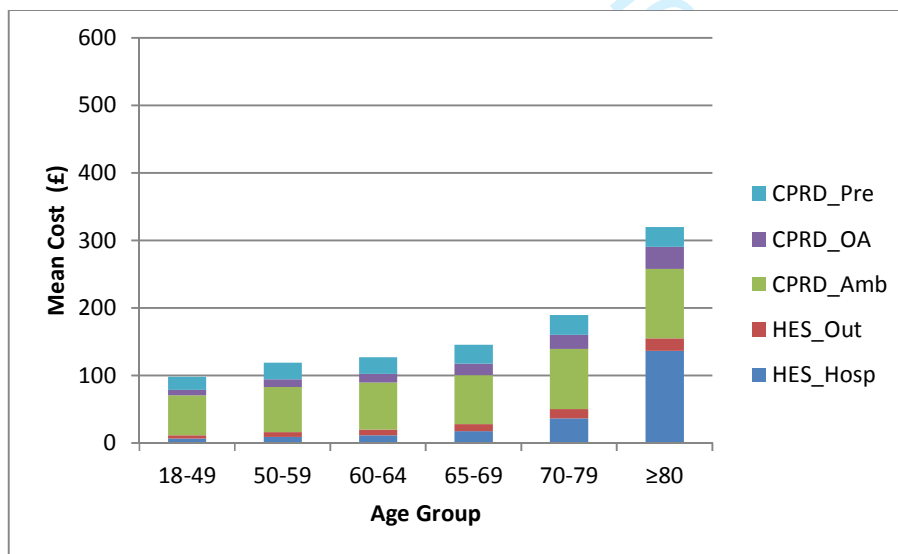

150

151 For HZ subjects without PHN: data from 7 days prior to 30 days post HZ onset included;

152 For HZ subjects with PHN: data from 7 days prior to 90 days post HZ onset included;

153

154 Abbreviations: HES, Hospital Episode Statistics; IC, immunocompromised; HZ, herpes zoster; PHN, post-herpetic neuralgia;

155 CPRD, Clinical Practice Research Datalink; CPRD-Pre, CPRD Prescriptions; CPRD-OA, CPRD Other Ambulatory

1  
2  
3 156 Visits; CPRD-Amb, CPRD Ambulatory Visits; HES-Out, HES Outpatient consultation; HES-Hosp, HES Hospital  
4 157 admission;  
5 158  
6 159  
7  
8  
9  
10  
11  
12  
13  
14  
15  
16  
17  
18  
19  
20  
21  
22  
23  
24  
25  
26  
27  
28  
29  
30  
31  
32  
33  
34  
35  
36  
37  
38  
39  
40  
41  
42  
43  
44  
45  
46  
47  
48  
49  
50  
51  
52  
53  
54  
55  
56  
57  
58  
59  
60

For peer review only

160 **Supplementary Figure 2: Healthcare Costs for each IC condition by age group**  
 161 **for the analysis period 7 days prior to 90 days post initial HZ onset**

162 **Panel A**

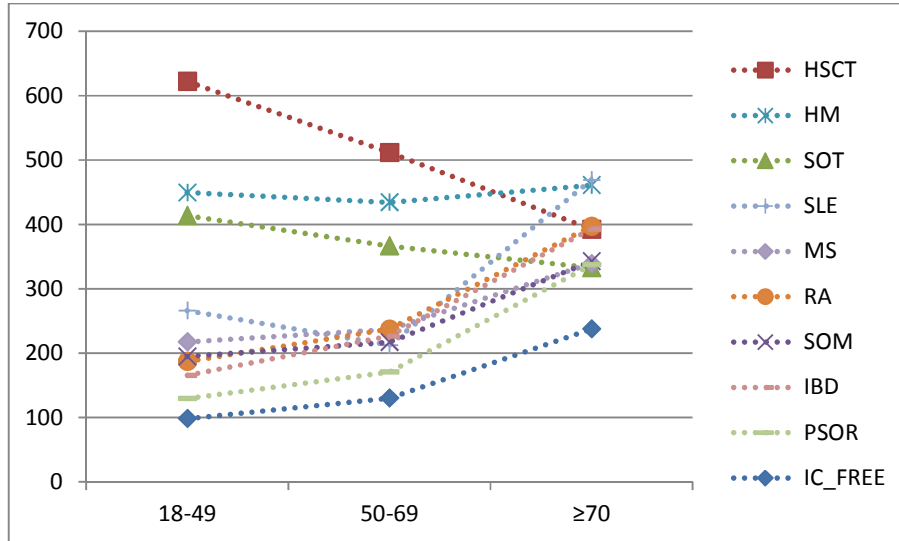

164 **Panel B**

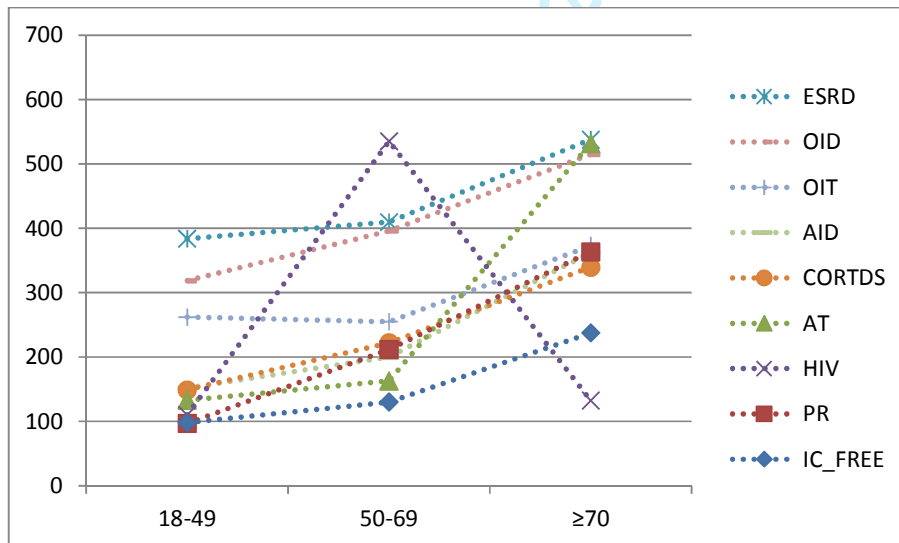

166 For HZ subjects without PHN: data from 7 days prior to 30 days post HZ onset included;

167 For HZ subjects with PHN: data from 7 days prior to 90 days post HZ onset included;

168

169 Abbreviations: HES, Hospital Episode Statistics; IC, immunocompromised; HZ, herpes zoster; PHN,  
 170 post-herpetic neuralgia; HSCT, hematopoietic stem cell transplantation; HM, haematological  
 171 malignancies; SOT, solid organ transplantations; SLE, systemic lupus erythematosus; MS, multiple  
 172 sclerosis; RA, rheumatoid arthritis; SOM, solid organ malignancies; IBD, inflammatory bowel  
 173 syndrome; PSOR, psoriasis; ESRD, end-stage renal disease; OID, other immunodeficiency; OIT, other

1  
2  
3 174 immunosuppressive therapy; AID, autoimmune diseases; CORTDS, corticosteroid exposure; AT,  
4 175 autoimmune thyroiditis; HIV, human immunodeficiency virus; PR, polymyalgia rheumatica  
5  
6  
7  
8  
9  
10  
11  
12  
13  
14  
15  
16  
17  
18  
19  
20  
21  
22  
23  
24  
25  
26  
27  
28  
29  
30  
31  
32  
33  
34  
35  
36  
37  
38  
39  
40  
41  
42  
43  
44  
45  
46  
47  
48  
49  
50  
51  
52  
53  
54  
55  
56  
57  
58  
59  
60

For peer review only

1  
2  
3  
4  
5  
6  
7  
8  
9  
10  
11  
12  
13  
14  
15  
16  
17  
18  
19  
20  
21  
22  
23  
24  
25  
26  
27  
28  
29  
30  
31  
32  
33  
34  
35  
36  
37  
38  
39  
40  
41  
42  
43  
44  
45  
46  
47  
48  
49  
50  
51  
52  
53  
54  
55  
56  
57  
58  
59  
60

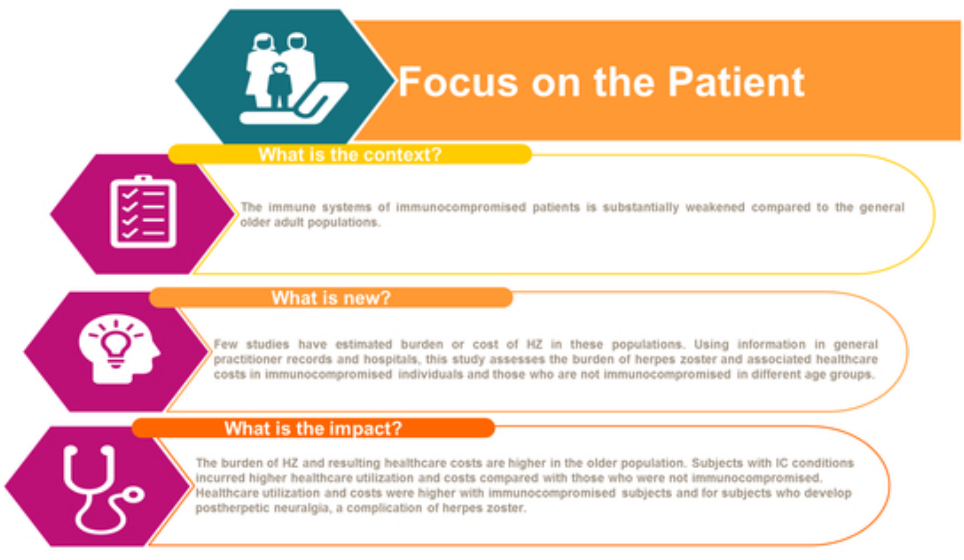

47x26mm (300 x 300 DPI)

## STROBE Statement—checklist of items that should be included in reports of observational studies

|                           | Item No | Recommendation                                                                                                                                                                                                                                                                                                                                                                                                                                                                                                                                                                                                                                                                                   |                              |
|---------------------------|---------|--------------------------------------------------------------------------------------------------------------------------------------------------------------------------------------------------------------------------------------------------------------------------------------------------------------------------------------------------------------------------------------------------------------------------------------------------------------------------------------------------------------------------------------------------------------------------------------------------------------------------------------------------------------------------------------------------|------------------------------|
| <b>Title and abstract</b> | 1       | (a) Indicate the study's design with a commonly used term in the title or the abstract<br>(b) Provide in the abstract an informative and balanced summary of what was done and what was found                                                                                                                                                                                                                                                                                                                                                                                                                                                                                                    | Pages 1 and 2,3<br>Pages 2,3 |
| <b>Introduction</b>       |         |                                                                                                                                                                                                                                                                                                                                                                                                                                                                                                                                                                                                                                                                                                  |                              |
| Background/rationale      | 2       | Explain the scientific background and rationale for the investigation being reported                                                                                                                                                                                                                                                                                                                                                                                                                                                                                                                                                                                                             | Page 5,6                     |
| Objectives                | 3       | State specific objectives, including any prespecified hypotheses                                                                                                                                                                                                                                                                                                                                                                                                                                                                                                                                                                                                                                 | Page 6                       |
| <b>Methods</b>            |         |                                                                                                                                                                                                                                                                                                                                                                                                                                                                                                                                                                                                                                                                                                  |                              |
| Study design              | 4       | Present key elements of study design early in the paper                                                                                                                                                                                                                                                                                                                                                                                                                                                                                                                                                                                                                                          | Page 6,7                     |
| Setting                   | 5       | Describe the setting, locations, and relevant dates, including periods of recruitment, exposure, follow-up, and data collection                                                                                                                                                                                                                                                                                                                                                                                                                                                                                                                                                                  | Pages 6-8                    |
| Participants              | 6       | (a) <i>Cohort study</i> —Give the eligibility criteria, and the sources and methods of selection of participants. Describe methods of follow-up<br><i>Case-control study</i> —Give the eligibility criteria, and the sources and methods of case ascertainment and control selection. Give the rationale for the choice of cases and controls<br><i>Cross-sectional study</i> —Give the eligibility criteria, and the sources and methods of selection of participants<br>(b) <i>Cohort study</i> —For matched studies, give matching criteria and number of exposed and unexposed<br><i>Case-control study</i> —For matched studies, give matching criteria and the number of controls per case | Page 6                       |
| Variables                 | 7       | Clearly define all outcomes, exposures, predictors, potential confounders, and effect modifiers. Give diagnostic criteria, if applicable                                                                                                                                                                                                                                                                                                                                                                                                                                                                                                                                                         | Pages 8,9                    |
| Data sources/measurement  | 8*      | For each variable of interest, give sources of data and details of methods of assessment (measurement). Describe comparability of assessment methods if there is more than one group                                                                                                                                                                                                                                                                                                                                                                                                                                                                                                             | Pages 8,9                    |
| Bias                      | 9       | Describe any efforts to address potential sources of bias                                                                                                                                                                                                                                                                                                                                                                                                                                                                                                                                                                                                                                        | Page 9                       |
| Study size                | 10      | Explain how the study size was arrived at                                                                                                                                                                                                                                                                                                                                                                                                                                                                                                                                                                                                                                                        | Pages 9,10                   |
| Quantitative variables    | 11      | Explain how quantitative variables were handled in the analyses. If applicable, describe which groupings were chosen and why                                                                                                                                                                                                                                                                                                                                                                                                                                                                                                                                                                     | Pages 8,9                    |
| Statistical methods       | 12      | (a) Describe all statistical methods, including those used to control for confounding<br>(b) Describe any methods used to examine subgroups and interactions<br>(c) Explain how missing data were addressed<br>(d) <i>Cohort study</i> —If applicable, explain how loss to follow-up was addressed<br><i>Case-control study</i> —If applicable, explain how matching of cases and controls was addressed                                                                                                                                                                                                                                                                                         | N/A                          |



*Cross-sectional study*—If applicable, describe analytical methods taking account of sampling strategy

---

(e) Describe any sensitivity analyses

## Results

|                          |     |                                                                                                                                                                                                                                                                                                                                                                                                               |             |
|--------------------------|-----|---------------------------------------------------------------------------------------------------------------------------------------------------------------------------------------------------------------------------------------------------------------------------------------------------------------------------------------------------------------------------------------------------------------|-------------|
| Participants             | 13* | (a) Report numbers of individuals at each stage of study—eg numbers potentially eligible, examined for eligibility, confirmed eligible, included in the study, completing follow-up, and analysed<br>(b) Give reasons for non-participation at each stage<br>(c) Consider use of a flow diagram                                                                                                               | Pages 9,10  |
| Descriptive data         | 14* | (a) Give characteristics of study participants (eg demographic, clinical, social) and information on exposures and potential confounders<br>(b) Indicate number of participants with missing data for each variable of interest<br>(c) <i>Cohort study</i> —Summarise follow-up time (eg, average and total amount)                                                                                           | N/A         |
| Outcome data             | 15* | <i>Cohort study</i> —Report numbers of outcome events or summary measures over time<br><i>Case-control study</i> —Report numbers in each exposure category, or summary measures of exposure<br><i>Cross-sectional study</i> —Report numbers of outcome events or summary measures                                                                                                                             | N/A         |
| Main results             | 16  | (a) Give unadjusted estimates and, if applicable, confounder-adjusted estimates and their precision (eg, 95% confidence interval). Make clear which confounders were adjusted for and why they were included<br>(b) Report category boundaries when continuous variables were categorized<br>(c) If relevant, consider translating estimates of relative risk into absolute risk for a meaningful time period | N/A         |
| Other analyses           | 17  | Report other analyses done—eg analyses of subgroups and interactions, and sensitivity analyses                                                                                                                                                                                                                                                                                                                | Pages 10,11 |
| <b>Discussion</b>        |     |                                                                                                                                                                                                                                                                                                                                                                                                               |             |
| Key results              | 18  | Summarise key results with reference to study objectives                                                                                                                                                                                                                                                                                                                                                      | Page 11,12  |
| Limitations              | 19  | Discuss limitations of the study, taking into account sources of potential bias or imprecision. Discuss both direction and magnitude of any potential bias                                                                                                                                                                                                                                                    | Pages 14    |
| Interpretation           | 20  | Give a cautious overall interpretation of results considering objectives, limitations, multiplicity of analyses, results from similar studies, and other relevant evidence                                                                                                                                                                                                                                    | Pages 14    |
| Generalisability         | 21  | Discuss the generalisability (external validity) of the study results                                                                                                                                                                                                                                                                                                                                         | Pages 12,13 |
| <b>Other information</b> |     |                                                                                                                                                                                                                                                                                                                                                                                                               |             |
| Funding                  | 22  | Give the source of funding and the role of the funders for the present study and, if applicable, for the original study on which the present article is based                                                                                                                                                                                                                                                 | Page 15     |

\*Give information separately for cases and controls in case-control studies and, if applicable, for exposed and unexposed groups in cohort and cross-sectional studies.

**Note:** An Explanation and Elaboration article discusses each checklist item and gives methodological background and published examples of transparent reporting. The STROBE checklist is best used in conjunction with this article (freely available on the Web sites of PLoS Medicine at <http://www.plosmedicine.org/>, Annals of Internal Medicine at <http://www.annals.org/>, and Epidemiology at <http://www.epidem.com/>). Information on the STROBE Initiative is available at [www.strobe-statement.org](http://www.strobe-statement.org).

# BMJ Open

## HERPES ZOSTER RELATED HEALTHCARE BURDEN AND COSTS IN IMMUNOCOMPROMISED (IC) AND IC-FREE POPULATIONS IN ENGLAND: AN OBSERVATIONAL RETROSPECTIVE DATABASE ANALYSIS

|                                 |                                                                                                                                                                                                                                                                                                                                                                                         |
|---------------------------------|-----------------------------------------------------------------------------------------------------------------------------------------------------------------------------------------------------------------------------------------------------------------------------------------------------------------------------------------------------------------------------------------|
| Journal:                        | <i>BMJ Open</i>                                                                                                                                                                                                                                                                                                                                                                         |
| Manuscript ID                   | bmjopen-2018-023502.R1                                                                                                                                                                                                                                                                                                                                                                  |
| Article Type:                   | Research                                                                                                                                                                                                                                                                                                                                                                                |
| Date Submitted by the Author:   | 03-Dec-2018                                                                                                                                                                                                                                                                                                                                                                             |
| Complete List of Authors:       | Curran, Desmond; GlaxoSmithKline, Value Evidence<br>Hunjan, Manjit; GlaxoSmithKline<br>El Ghachi, Amale; Aixial France; Hoffmann-La Roche Ltd<br>El-Hahi, Yassine; Valesta, Mechelen, Belgium c/o GSK; Accord Research<br>Bianco, Veronique; GSK Vaccines, Research and Development Center<br>Ferreira, Germano; P-95 Epidemiology and pharmacovigilance services,<br>Heverlee, Belgium |
| <b>Primary Subject Heading</b>: | Health economics                                                                                                                                                                                                                                                                                                                                                                        |
| Secondary Subject Heading:      | Epidemiology, Infectious diseases                                                                                                                                                                                                                                                                                                                                                       |
| Keywords:                       | Herpes zoster, postherpetic neuralgia, immunocompromized, hospitalization, healthcare burden, herpes zoster treatment                                                                                                                                                                                                                                                                   |
|                                 |                                                                                                                                                                                                                                                                                                                                                                                         |

SCHOLARONE™  
Manuscripts

1  
2  
3  
4 **1 TITLE PAGE**

5  
6 **2 HERPES ZOSTER RELATED HEALTHCARE BURDEN AND COSTS IN**  
7  
8 **3 IMMUNOCOMPROMISED (IC) AND IC-FREE POPULATIONS IN ENGLAND: AN**  
9  
10 **4 OBSERVATIONAL RETROSPECTIVE DATABASE ANALYSIS**

11  
12  
13  
14 **5 Desmond Curran<sup>a</sup>, Manjit Hunjan<sup>b</sup>, Amale El Ghachi<sup>c</sup>, Yassine El Hahi<sup>d</sup>, Veronique**

15  
16 **6 Bianco<sup>e</sup>, Germano Ferreira<sup>f</sup>**

17  
18  
19 **7 Affiliations**

20  
21  
22 <sup>a</sup>GSK, Wavre, Belgium; [desmond.x.curran@gsk.com](mailto:desmond.x.curran@gsk.com)

23  
24 <sup>b</sup>GSK, Uxbridge, United Kingdom; [manjit.k.hunjan@gsk.com](mailto:manjit.k.hunjan@gsk.com)

25  
26  
27 <sup>c</sup>AIXIAL, Boulogne-Billancourt, France c/o GSK, Wavre, Belgium; current affiliation F.

28  
29  
30 Hoffmann-La Roche Ltd., Basel, Switzerland ; [amale.el\\_ghachi@roche.com](mailto:amale.el_ghachi@roche.com)

31  
32 <sup>d</sup>Valesta, Mechelen, Belgium c/o GSK, Wavre, Belgium; current affiliation Accord Research

33  
34 s.r.o., Prague, Czech Republic ; [yassineelhahi@gmail.com](mailto:yassineelhahi@gmail.com)

35  
36  
37 <sup>e</sup>GSK, Rockville, Maryland, United States; [veronique.x.bianco@gsk.com](mailto:veronique.x.bianco@gsk.com)

38  
39 <sup>f</sup>P-95 Epidemiology and pharmacovigilance services, Heverlee, Belgium; [germano.ferreira@p-](mailto:germano.ferreira@p-)

40  
41 [95.com](mailto:germano.ferreira@p-95.com)

42  
43  
44 **17 Corresponding author**

45  
46  
47 Desmond Curran

48  
49 GSK, Avenue Fleming 20, 1300 Wavre, Belgium.

50  
51 Email: [desmond.x.curran@gsk.com](mailto:desmond.x.curran@gsk.com)

52  
53  
54 21

## 22 ABSTRACT

23 [[298/300 words]]

### 24 Objective

25 Individuals with immunocompromised (IC) conditions are at a higher risk of developing herpes  
26 zoster (HZ) than IC-free individuals. This study assessed the healthcare resource utilization  
27 (HCRU) burden and costs, of HZ in IC and IC-free individuals  $\geq 18$  years of age (YOA).

### 28 Methods

29 We conducted an observational retrospective study in a cohort of IC (N=621,588) and IC-free  
30 (N=621,588) individuals, matched by age, gender and GP practice region, contributing to the  
31 Clinical Practice Research Datalink database from 2000 to 2012 and linked to the Hospital Episode  
32 Statistics inpatient data. HCRU (i.e. primary and secondary care consultations, hospital inpatient  
33 stays, and treatment prescriptions) was analyzed from 7 days before to: (1) 30, (2) 365 days after  
34 the HZ diagnosis date for individuals with (1) HZ only (no post-herpetic neuralgia [PHN]) and (2)  
35 individuals with HZ and PHN only. Healthcare costs were computed by multiplying the number of  
36 units of resources utilized by the unit costs, summed across all HCRU categories to obtain a total  
37 cost per subject. Values were expressed in 2014 UK pound sterling (£) and presented for HZ cases  
38 overall, stratified by age (i.e. 18-49, 50-59, 60-69, 70-79 and  $\geq 80$  YOA) and IC status.

### 39 Results

40 The percentage of HZ cases requiring hospitalization was higher in IC individuals (2.7% *versus*  
41 0.4% in IC and IC-free individuals aged 18-49 YOA, respectively and 9.5% *versus* 7.5% in IC and  
42 IC-free individuals aged  $\geq 80$  YOA, respectively). Similarly, HZ-related mean treatment costs per

1  
2  
3 43 subject were higher in IC individuals (£189 *versus* £104 in IC and IC-free individuals aged 18-49  
4  
5 44 YOA, respectively and £557 *versus* £401 in IC and IC-free individuals aged  $\geq$ 80 YOA,  
6  
7 45 respectively). Costs varied considerably by IC condition.  
8  
9  
10

## 11 46 **Conclusions**

12  
13  
14 47 Individuals with IC conditions, not only have a higher risk of HZ than IC-free individuals, but also  
15  
16 48 incur higher HZ-related healthcare costs.  
17  
18  
19  
20  
21

## 22 50 **Keywords**

23  
24  
25 51 Herpes zoster, post-herpetic neuralgia, immunocompromized, hospitalization, healthcare burden,  
26  
27 52 herpes zoster treatment.  
28  
29  
30  
31  
32  
33  
34  
35  
36  
37  
38  
39  
40  
41  
42  
43  
44  
45  
46  
47  
48  
49  
50  
51  
52  
53  
54  
55  
56  
57  
58  
59  
60

## 54 STRENGTHS AND LIMITATIONS OF THIS STUDY

- 55 • The study is an observational retrospective descriptive study presenting the healthcare  
56 resource utilization and costs associated with herpes zoster (HZ) in both  
57 immunocompromised (IC) and IC-free populations aged  $\geq 18$  years of age in England.
- 58 • The IC population included 621,588 individuals who were registered in the Clinical  
59 Practice Research Datalink (CPRD) from January 2000 to March 2012 with  $\geq 12$ -month  
60 follow-up before being diagnosed with any of the selected 16 IC conditions and matched  
61 to the Hospital Episode Statistics (HES) database by age, gender and practice location to  
62 extract the IC-free population (N=621,588).
- 63 • The particularity of this study is that the design allowed calculation of IC condition  
64 prevalence rates, HZ incidence rates and occurrence of HZ-related healthcare utilization  
65 and costs at individual level in the same pre-defined population(s).
- 66 • This key study will provide data to be used in economic analyses to evaluate the value of  
67 vaccination in reducing the burden of HZ in IC populations.
- 68 • A limitation of the study is that the diagnoses were derived from administrative codes,  
69 which are recognized to be subject to miscoding or under-coding and are not validated  
70 against medical charts.

71

1  
2  
3 **72 LIST OF ABBREVIATIONS**  
4

5 73 £, 2014 UK pound sterling  
6

7 74 A&E, Accident and Emergency  
8

9 75 AID, autoimmune diseases  
10

11 76 ARDI, age-related decline in immunity  
12

13 77 AT, Autoimmune Thyroiditis  
14

15 78 BNF, British National Formulary  
16

17 79 CPRD, Clinical Practice Research Datalink  
18

19 80 GP, General Practitioner  
20

21 81 HCRU, healthcare resource utilization  
22

23 82 HES, Hospital Episode Statistics  
24

25 83 HIV, human immunodeficiency virus  
26

27 84 HM, hematological malignancies  
28

29 85 HSCT, hematopoietic stem cell transplantation  
30

31 86 HZ, herpes zoster  
32

33 87 HZ-Comp, HZ and complications with no PHN  
34

35 88 IC, immunocompromized  
36

37 89 ICD-10, International Classification of Diseases-10<sup>th</sup> revision  
38

39 90 ISAC, Independent Scientific Advisory Committee  
40

41 91 PHN, post-herpetic neuralgia  
42

43 92 PSSRU, Personal Social Services Research Unit  
44

45 93 PY, person-years  
46

47 94 RA, rheumatoid arthritis  
48

49 95 SLE, systemic lupus erythematosus  
50

51 96 SOT, solid organ transplantations  
52  
53  
54  
55  
56  
57  
58  
59  
60

- 1  
2  
3 97 UK, United Kingdom  
4  
5 98 US, United States  
6  
7 99 VZV-CMI, varicella zoster virus cell-mediated immunity  
8  
9 100 YOA, years of age  
10  
11 101 ZVL, zoster vaccine live  
12  
13  
14 102  
15  
16  
17  
18  
19  
20  
21  
22  
23  
24  
25  
26  
27  
28  
29  
30  
31  
32  
33  
34  
35  
36  
37  
38  
39  
40  
41  
42  
43  
44  
45  
46  
47  
48  
49  
50  
51  
52  
53  
54  
55  
56  
57  
58  
59  
60

For peer review only



## 103 INTRODUCTION

104 *[[2,819/4,000 words; 6/5 tables+figures but journal allows flexibility]]*

105 Varicella zoster virus cell-mediated immunity (VZV-CMI) inhibits the development of herpes  
106 zoster (HZ)<sup>1</sup>. Therefore, if for any reason VZV-CMI declines, the risk of HZ increases. Reasons  
107 for VZV-CMI decline can include, increasing age and immune suppression. VZV-CMI is not  
108 optimal in individuals with immunocompromized (IC) conditions and the age-specific incidence  
109 and severity of HZ greatly increases in IC patients due to underlying illness (e.g. human  
110 immunodeficiency virus [HIV] infection) or immunosuppressive therapies for autoimmune  
111 disease, malignancy, or organ transplantation<sup>2</sup>.

112 The incidence and severity of HZ is marked with an increase in people  $\geq 50$  years of age (YOA)  
113 due to an age-related decline in immunity (ARDI). In the United Kingdom (UK) the incidence of  
114 HZ rises from 7.1 per 1000 person-years (PY) among 60-64 year olds to 12.2 per 1000 PY among  
115 individuals aged  $\geq 85$  YOA<sup>3</sup>. Further to the impact of ARDI, a study by Forbes et al. in 2014  
116 investigated the increased risk for HZ in the UK population, associated with autoimmune  
117 conditions such as rheumatoid arthritis (RA), systemic lupus erythematosus (SLE); and chronic  
118 conditions such as diabetes mellitus, chronic obstructive pulmonary disease, chronic kidney  
119 disease, and asthma<sup>2</sup>. In addition to the increased risk of HZ in the various IC conditions these  
120 populations also experience increased severity of disease. In a study in Canada, Drolet et al.  
121 reported that individuals with an impaired immune status had HZ severity of illness scores, as  
122 measured by the Zoster Brief Pain Inventory, which were twice as high as individuals with normal  
123 immune function<sup>4,5</sup>. In a study in the United States (US), Yawn et al. reported that although 8% of  
124 HZ cases were in individuals who were immunocompromised, these individuals represented 23.8%

1  
2  
3 125 of the total HZ-related costs<sup>6</sup>. The increase in healthcare costs was associated with higher rates of  
4  
5 126 post-herpetic neuralgia (PHN) and non-pain complications in this group of individuals<sup>6</sup>.  
6  
7

8  
9 127 This study aims to estimate the healthcare resource utilization of HZ in selected IC populations and  
10  
11 128 in an IC-free (i.e., immunocompetent) population aged  $\geq 18$  YOA in England. The clinical burden  
12  
13 129 of disease epidemiological results of the study are reported elsewhere<sup>7</sup>, and may be summarized as  
14  
15 130 follows: the prevalence of IC conditions increased from 7.6% in individuals aged 18-44 YOA to  
16  
17 131 42.2% in individuals aged  $\geq 80$  YOA; the incidence rate of HZ in the IC cohort was 3.5/1000 PY  
18  
19 132 in individuals aged 18-49 YOA increasing to 12.6/1000 PY in individuals aged  $\geq 80$  YOA. In this  
20  
21 133 manuscript, we focus on the healthcare resource utilization and costs associated with HZ in both  
22  
23 134 IC and IC-free populations.  
24  
25  
26  
27

## 28 135 **METHODS**

29  
30 136 The study was conducted as an observational retrospective descriptive study (e-track number:  
31  
32 137 201615), in a cohort of eligible matched IC and IC-free populations (aged  $\geq 18$  YOA). The IC  
33  
34 138 population included individuals who were registered in the Clinical Practice Research Datalink  
35  
36 139 (CPRD) from January 2000 to March 2012 with  $\geq 12$ -month follow-up before being diagnosed with  
37  
38 140 any of the selected 16 IC conditions (See Supplemental Material). The CPRD IC population cohort  
39  
40 141 linked to the Hospital Episode Statistics (HES) database was matched to a cohort of HES linked  
41  
42 142 IC-free population (N=621,588), by age, gender and practice location. Individuals with a missing  
43  
44 143 date of IC diagnosis were excluded from the study population. Clinical diagnoses were based on  
45  
46 144 READ codes used in CPRD and with the International Classifications of Diseases-10<sup>th</sup> revision  
47  
48 145 (ICD-10) codes in the HES database.  
49  
50  
51  
52  
53  
54  
55  
56  
57  
58  
59  
60

1  
2  
3 146 The study protocol was approved by the Independent Scientific Advisory Committee (ISAC) for  
4  
5 147 the Medicines and Healthcare Products Regulatory Agency database research (ISAC protocol  
6  
7 148 number 14\_222R). The study was conducted in accordance with all applicable regulatory  
8  
9  
10 149 requirements, with the Guidelines for Good Pharmacoepidemiology Practices<sup>8</sup>, all applicable  
11  
12 150 patient privacy requirements and the guiding principles of the Declaration of Helsinki.

13  
14  
15 151 The matched IC and IC-free cohorts were followed up from the index date until the earliest of the  
16  
17 152 following events: transfer out of the practice date, the last GP practice collections date, death date  
18  
19 153 or the end of the study<sup>7</sup>. Healthcare resource data associated with an incident HZ episode during  
20  
21 154 the study follow-up were extracted for IC and Matched IC-free HES-linked individuals. Only  
22  
23 155 reported records (resource utilization) with available event dates during the individuals' eligibility  
24  
25 156 period and those that occurred 7 days before the initial HZ onset date, up to 365 days after the  
26  
27 157 initial HZ onset date, were extracted. Consequently, individuals who recorded the first PHN event  
28  
29 158 date after 365 days post HZ event date were classified as not having PHN.  
30  
31  
32  
33

### 34 35 159 **Patient and Public Involvement**

36  
37  
38 160 This is a retrospective database analysis carried out following ethical committee approval. No  
39  
40 161 patient or the public was involved in the study design or in the recruitment or the conduct of this  
41  
42 162 study. No specific dissemination of study results to participants was done. However, we provided  
43  
44 163 a lay language summary contextualizing the results and potential clinical research relevance and  
45  
46 164 impact in Figure 1.  
47  
48  
49

### 50 51 165 **Data sources**

52  
53 166 Data were extracted from the following sources: (1) CPRD GOLD 2014Q3: Consultation, Clinical,  
54  
55 167 Therapy and Referral datasets; (2) HES Inpatient 2013Q3: HES\_DIAGNOSIS\_EPI dataset; (3)  
56  
57  
58

1  
2  
3 168 HES Outpatient data (Set 9): Appointment and clinical datasets. Healthcare resource utilization  
4  
5 169 was defined as: HZ-treatment related prescribed medications (CPRD tbl:therapy); Consultations  
6  
7 170 and care provided by General Practitioners (GPs) or others in the GP practice  
8  
9  
10 171 (CPRD tbl:consultations); HES secondary care outpatient visits (HES outpatient events); and HES  
11  
12 172 inpatient hospitalizations (HES inpatient events).

13  
14  
15 173 For each patient, healthcare costs stratified by subcategory of interest (HES Inpatient  
16  
17 174 Hospitalizations; HES Outpatient consultations/visits; CPRD Ambulatory Visits; CPRD Other  
18  
19 175 Ambulatory Visits; CPRD Prescriptions) were computed by multiplying units of resource use by  
20  
21 176 their unit costs. These were then summed over all resource use categories to obtain a total cost for  
22  
23 177 each patient. Values were expressed in 2014 UK pound sterling (£).

### 24 25 26 27 28 178 **Healthcare resource costs**

29  
30  
31 179 For each patient, the cost of each prescription was calculated by merging the product code, package  
32  
33 180 type and prescribed quantity (prodcodetype-quantity) with the associated standard package  
34  
35 181 size and unit cost. The unit cost of a product in a prescription instance (i.e. one distinct record in  
36  
37 182 the CPRD therapy) was calculated using the cost described in the British National Formulary  
38  
39 183 (BNF), 2015 (as listed price if included or indicative price based on price in BNF).

40  
41  
42  
43 184 Ambulatory visits included consultations with GPs and nurses in primary or community care. Visits  
44  
45 185 included consultations at the practice or at the home of the patient, during working hours and out  
46  
47 186 of hours. Consultations for which no clinical intervention was recorded were not included in the  
48  
49 187 cost estimate for GP practice related healthcare utilization, for example: information technology  
50  
51 188 data migration, administrative recording of received information. Administrative resource use in  
52  
53 189 primary care was considered, including time on the phone, writing reports, referrals, etc. A referral  
54  
55  
56  
57  
58

1  
2  
3 190 to secondary care noted in a patient's record, *per se*, was not allocated the cost of the secondary  
4  
5 191 care appointment. The most conservative option for the cost per unit as included in the Personal  
6  
7 192 Social Services Research Unit (PSSRU) Costs of Health and Social Care, 2014 were applied e.g.  
8  
9  
10 193 GP consultation costs excluded qualification, direct staff care and travel costs<sup>9</sup>. Where specific  
11  
12 194 costs for 2013/14 were not available, 2012/13 costs, were adjusted by applying the Hospital and  
13  
14 195 Community Health Services inflation index<sup>9</sup>. Administration costs were based on unit costs as  
15  
16  
17 196 stated in the PSSRU, 2014.

18  
19  
20 197 Inpatient hospitalizations related to HZ were derived from HES data. Hospital Outpatient resource  
21  
22 198 utilization concerned HZ related referrals for non-inpatient hospital consultations, derived from the  
23  
24 199 HES Outpatient data. Additionally, visits to the Accident and Emergency (A&E) department in  
25  
26  
27 200 hospitals were also recorded and costed. Inpatient hospitalization costs were based on the average  
28  
29 201 cost per episode using HES data for 2013/14 (calculated from the total average payment by result  
30  
31 202 spell cost and the average number of episodes per spell). Hospital outpatient costs were sourced  
32  
33  
34 203 from National Tariff costs (2014) for specific consultant led outpatient consultations; conservative  
35  
36 204 costs were allocated i.e. wherever applicable costs for first attendance by a single professional  
37  
38 205 appointment were used<sup>10</sup>. Costs allocated to A&E visits were based on the cost of a category 3  
39  
40 206 investigation with category 1-3 treatment<sup>10</sup>. Only events related to HZ were costed out. Resources  
41  
42  
43 207 related to HZ complications were considered using ICD-10 Code B020.

44  
45  
46 208 No costs were assigned to Referrals, Sick leave or Nursing home care/admission entries in CPRD.  
47  
48 209 Further details, including information on the IC populations included, ICD-10 codes for HZ and  
49  
50 210 PHN, and unit healthcare costs are provided in the Supplementary Material, specifically in  
51  
52  
53 211 Supplementary Tables 1 to 4.

## 212 RESULTS

213 The HES-linked matched IC and IC-free population cohorts (n=621,588 each) included  
214 approximately 44% males and 56% females with a mean age of approximately 56 years. The age  
215 distribution of matched cohorts was: 18-44 YOA (28.8%), 45-49 YOA (7.1%), 50-59 YOA  
216 (17.2%), 60-64 YOA (9.9%), 65-69 YOA (9.4%), 70-79 YOA (16.6%), and  $\geq 80$  YOA (11.01%).

217 The proportion of inpatient hospital admissions by age group for the HES-linked Matched IC and  
218 IC-free cohorts over the time periods of 7 days prior to 90 days post initial HZ onset (Panel A) or  
219 7 days prior to 365 days post initial HZ onset (Panel B) are presented in Figure 2. Hospital  
220 admissions over the longer follow-up period of 7 days prior to 365 days post initial HZ onset (Panel  
221 B) were similar to those of the shorter follow-up period (Panel A) over all age groups. The  
222 percentage of HZ cases hospitalized were higher in IC individuals (e.g. in Panel B 2.7% *versus*  
223 0.4% in IC and IC-free individuals aged 18-49 YOA, respectively and 9.5% *versus* 7.5% in IC and  
224 IC-free individuals aged  $\geq 80$  YOA, respectively). Multiple HZ-related hospital visits were reported  
225 for some individuals. As such, Table 1 presents the mean number of healthcare resources utilized  
226 by IC Status, Age Group and Analysis period. The mean number of hospitalizations per HZ case  
227 for the 365-day analysis was, 0.035 and 0.005 in IC and IC-free individuals aged 18-49 YOA,  
228 respectively and 0.173 and 0.115 in IC and IC-free individuals aged  $\geq 80$  YOA, respectively. A  
229 similar pattern of higher healthcare resource utilization with increasing age and in IC individuals  
230 was observed for all resources for which costs were assigned. A similar mean number of sick leave  
231 certificates were observed between the IC and the IC-free cohorts with the mean decreasing with  
232 age. Nursing home care / admissions were only recorded for individuals aged  $\geq 70$  YOA in CPRD.  
233 Figure 3 and Table 2 present the overall healthcare costs by HES-linked matched IC cohort and  
234 age group for the analysis period 7 days prior to 365 days post initial HZ onset. The costs increase

1  
2  
3 235 with age and are consistently higher in the IC cohort compared with the IC-free cohort. Although  
4  
5 236 the absolute cost difference between IC and IC-free individuals increases with age from £85.5 in  
6  
7 237 individuals aged 18-49 YOA to £156.1 in individuals aged  $\geq 80$  YOA the relative difference is  
8  
9  
10 238 higher in younger individuals (i.e. 75.8%-99.2% in  $<70$  YOA) compared with older individuals  
11  
12 239 (i.e. 38.9%-57.6% in  $\geq 70$  YOA). It is also noteworthy that the means are consistently higher than  
13  
14 240 medians, and as is common for healthcare cost data, the distribution is skewed to the right.  
15  
16  
17 241 Supplementary Table 5 and Supplementary Figures 1 and 2 provide additional data on healthcare  
18  
19 242 Costs for the analysis period 7 days prior to 90 days post initial HZ onset.

20  
21  
22 243 Figure 4 presents the overall healthcare costs by each IC condition in the HES-linked matched IC  
23  
24 244 and IC-free cohort by age group for the analysis period 7 days prior to 365 days post initial HZ  
25  
26  
27 245 onset. For all IC conditions, the costs were higher than those for the IC-free group, in particular for  
28  
29 246 the hematopoietic stem cell transplantation (HSCT), hematological malignancies (HM) and solid  
30  
31 247 organ transplantations (SOT) conditions. In general, there was a similar trend of increasing costs  
32  
33  
34 248 with increasing age-groups. A few outliers were observed due to small sample sizes. For example,  
35  
36 249 only 3 and 8 individuals aged  $\geq 70$  YOA were included in the HIV and HSCT groups, respectively.  
37  
38  
39 250 Similarly, in total only 207 and 271 individuals with autoimmune thyroiditis (AT) and SOT were  
40  
41 251 included, respectively.

42  
43  
44 252 Table 3 presents the mean healthcare costs by IC status and HZ complication status. The mean  
45  
46 253 healthcare costs were approximately 4 to 5 times higher for individuals with PHN for the analysis  
47  
48 254 period 7 days prior to 365 days compared to individuals with HZ only. Similarly, mean healthcare  
49  
50  
51 255 costs were approximately 2 to 4 times higher for individuals with HZ complications compared to  
52  
53 256 individuals with HZ only.  
54  
55  
56  
57  
58  
59  
60

1  
2  
3 257 Supplementary Table 6 presents the non-HZ related hospital inpatient stay for the period 7 days to  
4  
5 258 365 days post initial-HZ onset. The mean number of non-HZ related hospitalizations were  
6  
7 259 consistently higher in IC patients compared to and IC-free patients and increased with age.  
9  
10  
11 260

## 14 261 **DISCUSSION**

16 262 In this study, we presented the healthcare resource utilization and costs associated with HZ in both  
17  
18 263 IC and IC-free populations using large electronic health record databases in the UK. An important  
19  
20 264 feature of this study was that the design enabled the calculation of IC condition prevalence rates,  
21  
22 265 HZ incidence rates and occurrence of HZ-related healthcare utilization and costs at individual level  
23  
24 266 in the same pre-defined population(s), see Yanni et. al. for further detail on epidemiological  
25  
26 267 outcomes<sup>7</sup>. In this study, every effort was made to include only resources directly related to HZ.  
27  
28 268 For example, only hospitalized patients were included who had an ICD-10 HZ diagnosis identified  
29  
30 269 in the HES database. Similarly, only medications potentially related to HZ treatment were included  
31  
32 270 (see Supplementary Material Tables 2 and 4). HZ-related mean treatment costs per patient were  
33  
34 271 higher in IC individuals (£189 *versus* £104 in IC and IC-free individuals aged 18-49 YOA,  
35  
36 272 respectively increasing to £557 *versus* £401 in IC and IC-free individuals aged  $\geq 80$  YOA,  
37  
38 273 respectively).  
39  
40  
41  
42  
43  
44

45 274 Previous studies of healthcare costs of HZ in the UK, included a small study, which estimated the  
46  
47 275 mean healthcare costs per HZ patient, from an National Health Services perspective, of £85.6 and  
48  
49 276 £400.9 in individuals aged  $<65$  YOA and  $\geq 65$  YOA, respectively<sup>11</sup>. A later UK study that used the  
50  
51 277 HES and the health improvement network databases, estimated the mean cost of treating a HZ  
52  
53 278 patient to be £65.5 in the first month of diagnosis, with patients aged  $\geq 70$  YOA having a mean cost  
54  
55  
56  
57  
58  
59  
60



1  
2  
3 279 of £83 in the first month and £15.80 in months 2 and 3<sup>12</sup>. The costs of treating individuals with  
4  
5 280 PHN were much higher, i.e. mean cost per patient was estimated to be £921 in all individuals and  
6  
7 281 £909.60 in individuals aged  $\geq 70$  YOA<sup>12</sup>. Another study evaluated mean healthcare costs (excluding  
8  
9 282 hospitalization costs) to be £75.63 per HZ patient with mean direct costs for treating PHN episodes  
10  
11 283 (PHN pain occurring or persisting for 3 months) of £340.04<sup>13</sup>. These values augmented with  
12  
13 284 hospitalization costs were used as inputs in a cost-effectiveness model evaluating a HZ vaccine  
14  
15 285 using the population of England and Wales<sup>3</sup>. The costs estimated by van Hoek et al. are consistent  
16  
17 286 with the values estimated in our study for IC-free individuals by age group<sup>3</sup>.

18  
19  
20  
21  
22 287 In a previous study, mean prescription costs per HZ patient were reported to be £40.52<sup>13</sup>. In our  
23  
24 288 study, the mean prescription costs per HZ patient ranged from £19.7 to £40.8 depending on the age  
25  
26 289 group, IC status and analysis period included. Our study aimed to include only medications  
27  
28 290 considered to be directly related to HZ; i.e. excluded medications that may be linked to IC  
29  
30 291 conditions (e.g. aspirin, analgesic creams as they could be used primarily to reduce pain from other  
31  
32 292 conditions). This restriction and the introduction of generic versions of medications such as  
33  
34 293 acyclovir, gabapentin (and derivatives of gabapentin) which resulted in lower prices, contributed  
35  
36 294 to the reduced overall medication costs reported in this study.

37  
38  
39  
40  
41 295 Many studies on HCRU and costs include a number of days prior to diagnosis, e.g. 14 or 21 days,  
42  
43 296 as there may be a delay in diagnosis and HCRU may be utilized prior to diagnosis<sup>6,14</sup>. In this  
44  
45 297 analysis, costs of HZ only cases were assessed during the period 7 days prior to 30 days post HZ  
46  
47 298 onset, although it is recognized that HZ episodes can last for longer. The costs of PHN were  
48  
49 299 analyzed over 2 time-periods, i.e. (1) 7 days prior to 90 days post HZ onset and (2) 7 days prior to  
50  
51 300 365 days post HZ onset. The rationale for the time periods studied was that using analysis period  
52  
53 301 1 alone could lead to an underestimation of PHN costs whereas using analysis period 2 only could  
54  
55  
56  
57  
58  
59  
60

1  
2  
3 302 overestimate these costs. The most frequently used definition of PHN is: pain persisting or  
4  
5 303 appearing at least 90 days following rash onset. The median duration of PHN has been reported to  
6  
7 304 be 10.3 and 12.9 months in individuals aged  $\leq 69$  and  $\geq 70$  YOA respectively<sup>15</sup>, and is likely to be  
8  
9 305 longer in individuals who are immunocompromised<sup>5</sup>.

10  
11  
12  
13 306 The healthcare costs associated with PHN and complications were higher than those for individuals  
14  
15 307 with HZ only. However, as reported elsewhere, when considering the overall cost of disease at a  
16  
17 308 population level, the overall healthcare-associated cost is higher for HZ only<sup>16</sup>. This is primarily a  
18  
19 309 result of the higher incidence rates of HZ only.

20  
21  
22  
23 310 Few studies have investigated healthcare resource utilization and costs in IC individuals. Schroder  
24  
25 311 et al. carried out a study using the German Pharmacoepidemiological Research Database, which  
26  
27 312 consists of claims data from four statutory health insurances<sup>17</sup>. They reported that during the quarter  
28  
29 313 of the HZ diagnosis or during the two following quarters, 10% of all HZ patients with an IC  
30  
31 314 condition were hospitalized (with a HZ diagnosis), whereas among IC-free HZ patients, 4.2% were  
32  
33 315 hospitalized. White et al. reported that in their study using the US Market Scan Research Database,  
34  
35 316 direct medical costs were nearly twice as high in IC patients compared with IC-free patients<sup>18</sup>. Li  
36  
37 317 et al. carried out a study using the US Truven Health MarketScan Commercial and Medicare  
38  
39 318 Supplemental Insurance databases<sup>19</sup>. They concluded that patients with the studied IC conditions  
40  
41 319 (i.e. HIV, SOT, bone marrow or stem cell transplant, and cancer) had significantly higher  
42  
43 320 healthcare utilization and cost when developing HZ than their comparable matches without HZ.  
44  
45 321 Insurance databases include not only the healthcare resource utilization but also costs. In the CPRD  
46  
47 322 and HES Databases only the resource utilization is captured. As such the overall costs need to be  
48  
49 323 calculated by assigning unit costs to the resource utilization. There are advantages however of using  
50  
51 324 the CPRD and HES in that the databases offer more diversity than might be observed using  
52  
53  
54  
55  
56  
57  
58  
59  
60

1  
2  
3 325 insurance databases, the latter of which may be somewhat limited by bias associated with factors  
4  
5 326 such as age, race, and income.  
6  
7

8  
9 327 This study has several limitations. Diagnoses were derived from administrative codes, which are  
10  
11 328 recognized to be subject to miscoding or under-coding and are not validated against medical charts.  
12  
13 329 Increasing healthcare resource utilization and cost is likely to be related to increased severity of IC  
14  
15 330 conditions. In a study, Schroder et al. categorized individuals as low IC and high IC<sup>17</sup>. However,  
16  
17 331 insufficient details are recorded in the CPRD and HES databases to allow adequate definition of  
18  
19 332 patients' severity of immunosuppression e.g. laboratory parameters, immunosuppressive  
20  
21 333 medication details such as chemotherapy. In addition, many IC individuals had prescriptions that  
22  
23 334 included more than one immunosuppressing medicine.  
24  
25  
26  
27

## 28 335 **CONCLUSION**

29  
30 336 In conclusion, individuals with IC conditions, seeking healthcare in the UK, incurred higher  
31  
32 337 healthcare utilization and costs than IC-free individuals<sup>6,7,14</sup>. The results from this study could be  
33  
34 338 used in economic analyses to evaluate the value of vaccination in reducing the burden of HZ in  
35  
36 339 these populations.  
37  
38  
39

40  
41 340  
42  
43  
44  
45  
46  
47  
48  
49  
50  
51  
52  
53  
54  
55  
56  
57  
58  
59  
60

## 341 **AUTHOR CONTRIBUTIONS**

342 VB, AEG, YEH, GF, MH and DC participated in the conception and design of the study. VB, AEG,  
343 YEH, GF and MH participated in the collection or generation of the study data. VB, AEG and YEH  
344 performed the study. AEG, YEH, MH and DC contributed to the material. VB, AEG, YEH, GF,  
345 MH and DC were involved in the analysis or interpretation of the data. All named authors provided  
346 substantial intellectual and scientific input during the manuscript development, critically reviewing  
347 the content, revising the manuscript and giving final approval before submission. The work  
348 described was carried out in accordance with the ICMJE recommendations for conducting,  
349 reporting, editing and publishing scholarly work in medical journals. All authors had full access to  
350 the data and gave final approval before submission.

## 351 **ACKNOWLEDGEMENTS**

352 The authors would like to thank Emmanuelle Espié, Yanni Emad, Morgane Guinnec, François  
353 Haguinet for their contribution to the study. They would also like to thank the Business & Decision  
354 Life Sciences platform for editorial assistance and coordination, on behalf of GSK. Gregory Collet  
355 coordinated manuscript development and editorial support. Kathleen Daly provided editing  
356 support. This study is based in part on data from the Clinical Practice Research Datalink obtained  
357 under licence from the UK Medicines and Healthcare products Regulatory Agency. However, the  
358 interpretation and conclusions contained in this report are those of the authors alone.

## 359 **CONFLICTS OF INTEREST**

360 VB, MH and DC are employees of the GSK group of companies. DC and MH hold shares in the  
361 GSK group of companies. AEG and YEH have nothing to disclose. GF was employed by the GSK  
362 group of companies between 2012 and Feb 2015, during which the study was designed and  
363 implemented. Later, as an employee of P-95 epidemiology and pharmacovigilance, GF provided

1  
2  
3 364 contracted consultancy services to the GSK group of companies for this and other GSK-sponsored  
4  
5 365 studies. P-95 provides contracted services to the GSK group of companies, beyond the scope of  
6  
7  
8 366 this study.  
9

## 10 11 367 **DATA SHARING STATEMENT**

12  
13 368 All data used in this study are presented in the manuscript, references to the original material are  
14  
15 369 provided. Please contact the corresponding author shall you require any additional information  
16  
17

## 18 19 370 **ETHICAL APPROVAL**

20  
21 371 Approval was obtained from the Clinical Practice Research Datalink Independent Scientific  
22  
23 372 Advisory Committee (14\_222R).  
24  
25

## 26 27 373 **FUNDING**

28  
29 374 GlaxoSmithKline Biologicals SA was the funding source and was involved in all study (GSK study  
30  
31 375 identifier: e-track number: 201615) activities and overall data management (collection, analysis  
32  
33 376 and interpretation). GlaxoSmithKline Biologicals SA also funded all costs associated with the  
34  
35 377 development and the publishing of the present manuscript. All authors had full access to the data  
36  
37  
38 378 and the corresponding author was responsible for submission of the publication.  
39  
40  
41  
42  
43  
44  
45  
46  
47  
48  
49  
50  
51  
52  
53  
54  
55  
56  
57  
58  
59  
60

1  
2  
3 379 **REFERENCES**  
4

- 5 380 1. Oxman M. Zoster vaccine: current status and future prospects. Clin Infect Dis 2010;**51**(2):197-  
6  
7 381 213.  
8  
9  
10  
11 382 2. Forbes HJ, Bhaskaran K, Thomas SL, et al. Quantification of risk factors for herpes zoster:  
12  
13 383 population based case-control study. BMJ 2014;**348**:g2911.  
14  
15  
16 384 3. van Hoek AJ, Gay N, Melegaro A. Estimating the cost-effectiveness of vaccination against  
17  
18 385 herpes zoster in England and Wales. Vaccine 2009;**27**:1454-67.  
19  
20  
21  
22 386 4. Coplan PM, Schmader K, Nikas A, et al. Development of a measure of the burden of pain due  
23  
24 387 to herpes zoster and postherpetic neuralgia for prevention trials: adaptation of the brief pain  
25  
26 388 inventory. J Pain 2004;**5**(6):344-56.  
27  
28  
29  
30 389 5. Drolet M, Brisson M, Schmader K, et al. Predictors of postherpetic neuralgia among patients  
31  
32 390 with herpes zoster: a prospective study. J Pain 2010;**11**(11):1211-21.  
33  
34  
35  
36 391 6. Yawn BP, Itzler RF, Wollan PC, et al. Health care utilization and cost burden of herpes zoster  
37  
38 392 in a community population. Mayo Clin Proc 2009;**84**(9):787-94.  
39  
40  
41 393 7. Yanni E, Ferreira G, El Hahi Y, et al. The burden of herpes zoster in 16 selected  
42  
43 394 immunocompromised populations in England: a cohort study in the Clinical Practice Research  
44  
45 395 Datalink 2000-2012. BMJ Open 2018;**8**:e020528.  
46  
47  
48  
49 396 8. International Society for Pharmacoepidemiology. Guidelines for Good Pharmacoepidemiology  
50  
51 397 Practices (GPP). Secondary Guidelines for Good Pharmacoepidemiology Practices (GPP) 2015.  
52  
53 398 [https://www.pharmacoepi.org/resources/guidelines\\_08027.cfm](https://www.pharmacoepi.org/resources/guidelines_08027.cfm).  
54  
55  
56  
57  
58  
59  
60

- 1  
2  
3 399 9. Curtis LPSSRU. Unit costs of Health & Social Care 2014. Secondary Unit costs of Health &  
4  
5 400 Social Care 2014 2014. <http://www.pssru.ac.uk/project-pages/unit-costs/2014/>.  
6  
7  
8  
9 401 10. National Tariff Payment System. Annex 5A National Prices. Secondary Annex 5A National  
10  
11 402 Prices 2014/2015. [https://www.gov.uk/government/publications/national-tariff-payment-system-](https://www.gov.uk/government/publications/national-tariff-payment-system-2014-to-2015)  
12  
13 403 [2014-to-2015](https://www.gov.uk/government/publications/national-tariff-payment-system-2014-to-2015).  
14  
15  
16 404 11. Scott FT, Johnson RW, Leedham-Green M, et al. The burden of Herpes Zoster: a prospective  
17  
18 405 population based study. *Vaccine* 2006;**24**(9):1308-14.  
19  
20  
21  
22 406 12. Taieb V, Schwarzbard J, Butt T, et al. The Epidemiological and Cost Burden of Herpes  
23  
24 407 Zoster (Hz) and Post-Herpetic Neuralgia (Phn) in the UK. *Value Health* 2015;**18**(7):A589.  
25  
26  
27  
28 408 13. Gauthier A, Breuer J, Carrington D, et al. Epidemiology and cost of herpes zoster and post-  
29  
30 409 herpetic neuralgia in the United Kingdom. *Epidemiol Infect* 2009;**137**(1):38-47.  
31  
32  
33 410 14. Li A, Chen SY, Burstin SJ, et al. Cost of Herpes Zoster in Patients With Selected Immune-  
34  
35 411 Compromised Conditions in the United States. *Open Forum Infect Dis* 2016;**3**(2):ofw067.  
36  
37  
38  
39 412 15. Moore L, Remy V, Martin M, et al. A health economic model for evaluating a vaccine for the  
40  
41 413 prevention of herpes zoster and post-herpetic neuralgia in the UK. *Cost Eff Resour Alloc*  
42  
43 414 2010;**8**:7.  
44  
45  
46  
47 415 16. Gater A, Uhart M, McCool R, et al. The humanistic, economic and societal burden of herpes  
48  
49 416 zoster in Europe: a critical review. *BMC Public Health* 2015;**15**:193.  
50  
51  
52  
53 417 17. Schröder C, Enders D, Schink T, et al. Incidence of herpes zoster amongst adults varies by  
54  
55 418 severity of immunosuppression. *J Infect* 2017;**S0163-4453**(17):30228-1.  
56  
57  
58  
59  
60

1  
2  
3 419 18. White RR, Lenhart G, Singhal PK, et al. Incremental 1-Year Medical Resource Utilization  
4  
5 420 and Costs for Patients with Herpes Zoster from a Set of US Health Plans. *Pharmacoeconomics*  
6  
7 421 2009;27(9):781-92.  
8  
9

10  
11 422  
12  
13  
14  
15  
16  
17  
18  
19  
20  
21  
22  
23  
24  
25  
26  
27  
28  
29  
30  
31  
32  
33  
34  
35  
36  
37  
38  
39  
40  
41  
42  
43  
44  
45  
46  
47  
48  
49  
50  
51  
52  
53  
54  
55  
56  
57  
58  
59  
60

For peer review only



423 **TABLES**424 **Table 1: Mean number of healthcare resources by IC status, age group and analysis period**

|                              | IC cohort |         | IC-Free cohort |         |
|------------------------------|-----------|---------|----------------|---------|
|                              | 90 Day    | 365 Day | 90 Day         | 365 Day |
| HES Hospital admission       |           |         |                |         |
| 18-49                        | 0.035     | 0.035   | 0.005          | 0.005   |
| 50-59                        | 0.042     | 0.046   | 0.006          | 0.007   |
| 60-64                        | 0.053     | 0.055   | 0.009          | 0.010   |
| 65-69                        | 0.049     | 0.050   | 0.014          | 0.014   |
| 70-79                        | 0.072     | 0.076   | 0.029          | 0.030   |
| ≥80                          | 0.163     | 0.173   | 0.108          | 0.115   |
| HES Outpatient consultation  |           |         |                |         |
| 18-49                        | 0.095     | 0.116   | 0.041          | 0.045   |
| 50-59                        | 0.086     | 0.122   | 0.062          | 0.086   |
| 60-64                        | 0.136     | 0.180   | 0.065          | 0.078   |
| 65-69                        | 0.146     | 0.217   | 0.085          | 0.108   |
| 70-79                        | 0.165     | 0.267   | 0.113          | 0.181   |
| ≥80                          | 0.173     | 0.313   | 0.149          | 0.231   |
| CPRD Ambulatory visits       |           |         |                |         |
| 18-49                        | 2.816     | 3.168   | 2.186          | 2.360   |
| 50-59                        | 3.334     | 4.175   | 2.466          | 2.907   |
| 60-64                        | 3.733     | 5.081   | 2.598          | 3.115   |
| 65-69                        | 4.089     | 6.009   | 2.774          | 3.610   |
| 70-79                        | 4.534     | 6.959   | 3.413          | 4.767   |
| ≥80                          | 4.881     | 7.422   | 3.811          | 5.367   |
| CPRD Other ambulatory visits |           |         |                |         |
| 18-49                        | 0.319     | 0.411   | 0.155          | 0.170   |
| 50-59                        | 0.433     | 0.623   | 0.218          | 0.277   |

|    |                                     |       |       |       |       |
|----|-------------------------------------|-------|-------|-------|-------|
| 1  |                                     |       |       |       |       |
| 2  |                                     |       |       |       |       |
| 3  | 60-64                               | 0.545 | 0.885 | 0.251 | 0.360 |
| 4  |                                     |       |       |       |       |
| 5  | 65-69                               | 0.607 | 1.064 | 0.330 | 0.454 |
| 6  |                                     |       |       |       |       |
| 7  | 70-79                               | 0.686 | 1.251 | 0.417 | 0.722 |
| 8  |                                     |       |       |       |       |
| 9  | ≥80                                 | 0.860 | 1.616 | 0.668 | 1.183 |
| 10 |                                     |       |       |       |       |
| 11 | CPRD Prescriptions (All treatments) |       |       |       |       |
| 12 | 18-49                               | 1.247 | 1.363 | 0.890 | 0.931 |
| 13 |                                     |       |       |       |       |
| 14 | 50-59                               | 1.670 | 1.994 | 1.143 | 1.227 |
| 15 |                                     |       |       |       |       |
| 16 | 60-64                               | 1.969 | 2.602 | 1.379 | 1.489 |
| 17 |                                     |       |       |       |       |
| 18 | 65-69                               | 2.129 | 2.894 | 1.473 | 1.717 |
| 19 |                                     |       |       |       |       |
| 20 | 70-79                               | 2.310 | 3.295 | 1.814 | 2.347 |
| 21 |                                     |       |       |       |       |
| 22 | ≥80                                 | 2.405 | 3.743 | 1.844 | 2.575 |
| 23 |                                     |       |       |       |       |
| 24 | CPRD Referrals*                     |       |       |       |       |
| 25 | 18-49                               | 0.018 | 0.020 | 0.011 | 0.012 |
| 26 |                                     |       |       |       |       |
| 27 | 50-59                               | 0.021 | 0.026 | 0.018 | 0.022 |
| 28 |                                     |       |       |       |       |
| 29 | 60-64                               | 0.031 | 0.040 | 0.020 | 0.024 |
| 30 |                                     |       |       |       |       |
| 31 | 65-69                               | 0.031 | 0.044 | 0.015 | 0.023 |
| 32 |                                     |       |       |       |       |
| 33 | 70-79                               | 0.033 | 0.054 | 0.031 | 0.047 |
| 34 |                                     |       |       |       |       |
| 35 | ≥80                                 | 0.040 | 0.065 | 0.029 | 0.048 |
| 36 |                                     |       |       |       |       |
| 37 | CPRD Sick leave*                    |       |       |       |       |
| 38 | 18-49                               | 0.162 | 0.175 | 0.155 | 0.161 |
| 39 |                                     |       |       |       |       |
| 40 | 50-59                               | 0.156 | 0.178 | 0.173 | 0.182 |
| 41 |                                     |       |       |       |       |
| 42 | 60-64                               | 0.060 | 0.069 | 0.080 | 0.087 |
| 43 |                                     |       |       |       |       |
| 44 | 65-69                               | 0.017 | 0.017 | 0.008 | 0.008 |
| 45 |                                     |       |       |       |       |
| 46 | 70-79                               | 0.001 | 0.001 | 0.002 | 0.003 |
| 47 |                                     |       |       |       |       |
| 48 | ≥80                                 | 0.000 | 0.000 | 0.000 | 0.000 |
| 49 |                                     |       |       |       |       |
| 50 | CPRD Nursing home care/admission*   |       |       |       |       |
| 51 | 18-69                               | 0.000 | 0.000 | 0.000 | 0.000 |
| 52 |                                     |       |       |       |       |
| 53 | 70-79                               | 0.001 | 0.001 | 0.001 | 0.001 |
| 54 |                                     |       |       |       |       |
| 55 |                                     |       |       |       |       |
| 56 |                                     |       |       |       |       |
| 57 |                                     |       |       |       |       |
| 58 |                                     |       |       |       |       |
| 59 |                                     |       |       |       |       |
| 60 |                                     |       |       |       |       |

1  
2  
3  
4  
5  
6  
7  
8  
9  
10  
11  
12  
13  
14  
15  
16  
17  
18  
19  
20  
21  
22  
23  
24  
25  
26  
27  
28  
29  
30  
31  
32  
33  
34  
35  
36  
37  
38  
39  
40  
41  
42  
43  
44  
45  
46  
47  
48  
49  
50  
51  
52  
53  
54  
55  
56  
57  
58  
59  
60

|     |       |       |       |       |
|-----|-------|-------|-------|-------|
| ≥80 | 0.004 | 0.004 | 0.003 | 0.003 |
|-----|-------|-------|-------|-------|

425  
426  
427  
428  
429  
430

---

\* No costs were assigned for CPRD Referrals, CPRD Sick leave, CPRD Nursing home care / admission  
Abbreviations: IC, immunocompromized; HES, Hospital Episode Statistics; CPRD, Clinical Practice Research Datalink;  
Costs were assigned for HES Hospital admission, HES Outpatient consultation, CPRD Ambulatory Visits, CPRD Other  
Ambulatory Visits, CPRD Prescriptions.

For peer review only

431 **Table 2: Mean cost (£) of healthcare resource utilization by IC status, age group and**  
 432 **analysis period\***

| Age groups (YOA) | Statistic  | Mean cost (£) |                |                |               |
|------------------|------------|---------------|----------------|----------------|---------------|
|                  |            | IC cohort     |                | IC-free cohort |               |
|                  |            | 90 Day        | 365 Day        | 90 Day         | 365 Day       |
| 18-49            | Mean       | 173.3         | 189.3          | 98.2           | 103.8         |
|                  | Median, SD | 86.1, 332.54  | 86.9, 375.31   | 59.6, 139.37   | 62.0, 152.82  |
| 50-59            | Mean       | 199.0         | 237.8          | 118.9          | 135.3         |
|                  | Median, SD | 106.6, 372.15 | 108.8, 528.36  | 74.6, 197.77   | 74.8, 249.02  |
| 60-64            | Mean       | 236.2         | 294.2          | 126.8          | 147.7         |
|                  | Median, SD | 120.2, 473.92 | 124.1, 606.36  | 78.9, 215.45   | 80.9, 279.29  |
| 65-69            | Mean       | 241.6         | 317.4          | 145.5          | 174.4         |
|                  | Median, SD | 132.2, 447.25 | 140.0, 590.29  | 87.9, 239.31   | 90.7, 307.75  |
| 70-79            | Mean       | 289.6         | 391.7          | 189.8          | 248.6         |
|                  | Median, SD | 154.2, 531.25 | 163.9, 744.81  | 108.8, 366.74  | 113.6, 508.42 |
| ≥80              | Mean       | 427.0         | 557.1          | 319.7          | 401.0         |
|                  | Median, SD | 176.2, 815.38 | 188.6, 1059.68 | 143.0, 630.70  | 154.0, 767.72 |

433

434 \* post initial HZ onset

435 Abbreviations: £: 2014 UK pound sterling; HZ: herpes zoster; IC, immunocompromized; YOA: years of age, SD:Standard

436 Deviation

437

438 **Table 3: Mean cost (£) of healthcare resource utilization by IC status, age group, analysis**  
 439 **period and HZ complication status**

| Age groups<br>(YOA) |            | Mean cost (£), IC      |                         |                          |                      |
|---------------------|------------|------------------------|-------------------------|--------------------------|----------------------|
|                     |            | HZ only*               | PHN Day 90 <sup>#</sup> | PHN Day 365 <sup>!</sup> | HZ-Comp <sup>§</sup> |
| 18-49               | Mean       | 156.6                  | 302.4                   | 746.6                    | 573.3                |
|                     | Median, SD | 81.8, 298.78           | 194.7, 354.78           | 465.7, 813.67            | 176.5, 799.00        |
| 50-59               | Mean       | 168.1                  | 468.0                   | 998.9                    | 562.6                |
|                     | Median, SD | 93.9, 280.38           | 262.8, 779.39           | 588.8, 1410.97           | 226.0, 788.06        |
| 60-64               | Mean       | 190.8                  | 538.7                   | 1135.5                   | 780.5                |
|                     | Median, SD | 108.8, 360.09          | 297.7, 812.63           | 688.2, 1204.79           | 226.4, 1240.23       |
| 65-69               | Mean       | 195.6                  | 489.3                   | 1064.3                   | 551.8                |
|                     | Median, SD | 109.6, 388.27          | 305.4, 605.84           | 738.9, 960.15            | 204.9, 778.37        |
| 70-79               | Mean       | 228.9                  | 540.4                   | 1200.2                   | 847.5                |
|                     | Median, SD | 129.0, 413.49          | 324.5, 783.04           | 808.4, 1294.77           | 337.4, 1166.29       |
| ≥80                 | Mean       | 307.6                  | 779.5                   | 1536.0                   | 1396.4               |
|                     | Median, SD | 148.6, 614.83          | 384.3, 1051.87          | 937.3, 1663.11           | 516.5, 1769.26       |
|                     |            | Mean cost (£), IC-free |                         |                          |                      |
|                     |            | HZ only*               | PHN Day 90 <sup>#</sup> | PHN Day 365 <sup>!</sup> | HZ-Comp <sup>§</sup> |
| 18-49               | Mean       | 91.6                   | 216.1                   | 391.9                    | 246.4                |
|                     | Median, SD | 54.9, 118.74           | 137.7, 318.86           | 261.9, 393.31            | 106.6, 347.45        |
| 50-59               | Mean       | 106.8                  | 262.8                   | 540.8                    | 275.1                |
|                     | Median, SD | 72.0, 141.43           | 208.2, 332.40           | 391.3, 589.56            | 118.1, 864.14        |
| 60-64               | Mean       | 114.1                  | 270.5                   | 556.1                    | 192.7                |
|                     | Median, SD | 74.6, 199.18           | 191.9, 308.00           | 409.4, 608.19            | 78.1, 331.63         |
| 65-69               | Mean       | 123.7                  | 287.7                   | 595.5                    | 592.6                |
|                     | Median, SD | 80.9, 168.04           | 202.4, 353.33           | 440.2, 591.86            | 229.5, 1079.09       |

|       |            |               |               |                 |                |
|-------|------------|---------------|---------------|-----------------|----------------|
| 70-79 | Mean       | 149.2         | 388.2         | 813.7           | 511.5          |
|       | Median, SD | 88.7, 266.27  | 248.6, 584.03 | 546.1, 955.88   | 232.9, 952.31  |
| ≥80   | Mean       | 242.0         | 607.4         | 1182.8          | 1046.5         |
|       | Median, SD | 121.3, 465.00 | 310.5, 888.22 | 726.9, 1 237.33 | 341.0, 1516.83 |

440

441 \* Individuals with HZ only (i.e. without PHN and complications): includes only costs 7 days prior to 30 days post initial HZ onset

442 # Individuals with HZ and PHN: includes only costs 7 days prior to 90 days post initial HZ onset

443 <sup>†</sup> Individuals with HZ and PHN: includes costs 7 days prior to 365 days post initial HZ onset

444 <sup>§</sup> Individuals with HZ and complications but no PHN: includes only costs 7 days prior to 30 days post initial HZ onset

445 Abbreviations: £: 2014 UK pound sterling; IC, immunocompromized; HZ, herpes zoster; PHN, post-herpetic neuralgia; HZ-Comp,

446 HZ and complications with no PHN; YOA: years of age

447

1  
2  
3  
4  
5  
6  
7  
8  
9  
10  
11  
12  
13  
14  
15  
16  
17  
18  
19  
20  
21  
22  
23  
24  
25  
26  
27  
28  
29  
30  
31  
32  
33  
34  
35  
36  
37  
38  
39  
40  
41  
42  
43  
44  
45  
46  
47  
48  
49  
50  
51  
52  
53  
54  
55  
56  
57  
58  
59  
60

448 **FIGURE**

449 **Figure 1: Lay Language Summary**

For peer review only

1  
2  
3 450 **Figure 2: Inpatient Hospital Admission by HES-linked Matched IC or IC-free cohort over**  
4  
5 451 **the time periods: 7 days prior to 90 days post initial HZ onset (Panel A) and 7 days prior to**  
6  
7 452 **365 days post initial HZ onset (Panel B)**  
8  
9

10 453  
11  
12  
13 454 For HZ individuals without PHN: data from 7 days prior to 30 days post HZ onset included.  
14  
15 455 For HZ individuals with PHN: data from 7 days prior until the following time periods after HZ onset included - 90 days (Panel A)  
16 456 and 365 days (Panel B).  
17 457 Abbreviations: HES, Hospital Episode Statistics; HZ, herpes zoster; IC, immunocompromised; PHN, post-herpetic neuralgia  
18  
19 458  
20  
21  
22  
23  
24  
25  
26  
27  
28  
29  
30  
31  
32  
33  
34  
35  
36  
37  
38  
39  
40  
41  
42  
43  
44  
45  
46  
47  
48  
49  
50  
51  
52  
53  
54  
55  
56  
57  
58  
59  
60



1  
2  
3 **459 Figure 3 : Healthcare Costs for by HES-linked Matched IC (Panel A) and IC-free cohort**  
4  
5 **460 (Panel B) for the analysis period 7 days prior to 365 days post initial HZ onset**  
6  
7

8 461  
9  
10  
11 462 For HZ individuals without PHN: data from 7 days prior to 30 days post HZ onset included.  
12  
13 463 For HZ individuals with PHN: data from 7 days prior until 365 days after HZ onset.  
14 464 Abbreviations: £, 2014 UK pound sterling; CPRD, Clinical Practice Research Datalink; CPRD-Pre, CPRD Prescriptions; CPRD-  
15 465 OA, CPRD Other Ambulatory Visits; CPRD-Amb, CPRD Ambulatory Visits; HES, Hospital Episode Statistics; HES-Out, HES  
16 466 Outpatient consultation; HES-Hosp, HES Hospital admission; IC, immunocompromised; HZ, herpes zoster; PHN, post-herpetic  
17 467 neuralgia.  
18  
19 468  
20  
21  
22  
23  
24  
25  
26  
27  
28  
29  
30  
31  
32  
33  
34  
35  
36  
37  
38  
39  
40  
41  
42  
43  
44  
45  
46  
47  
48  
49  
50  
51  
52  
53  
54  
55  
56  
57  
58  
59  
60

1  
2  
3 469 **Figure 4 : Healthcare Costs for each IC condition in the HES-linked Matched IC and IC-**  
4  
5 470 **free cohort by age group for the analysis period 7 days prior to 365 days post initial HZ**  
6  
7  
8 471 **onset**  
9

10 472  
11  
12  
13 473 For HZ individuals without PHN: data from 7 days prior to 30 days post HZ onset included.  
14 474 For HZ individuals with PHN: data from 7 days prior until 365 days after HZ onset.  
15  
16 475 Abbreviations: £, 2014 UK pound sterling; AID, autoimmune diseases; AT, autoimmune thyroiditis; CORTDS, corticosteroid  
17 476 exposure; ESRD, end-stage renal disease; HES, Hospital Episode Statistics; HIV, human immunodeficiency virus; HM,  
18 477 hematological malignancies; HSCT, hematopoietic stem cell transplantation; HZ, herpes zoster; IBD, inflammatory bowel  
19 478 syndrome; IC, immunocompromised; MS, multiple sclerosis; PHN, post-herpetic neuralgia; RA, rheumatoid arthritis; SLE,  
20 479 systemic lupus erythematosus; SOM, solid organ malignancies; SOT, solid organ transplantations; PSOR, psoriasis; OID, other  
21 480 immunodeficiency; OIT, other immunosuppressive therapy; PR, polymyalgia rheumatica.  
22  
23  
24 481

1  
2  
3  
4  
5  
6  
7  
8  
9  
10  
11  
12  
13  
14  
15  
16  
17  
18  
19  
20  
21  
22  
23  
24  
25  
26  
27  
28  
29  
30  
31  
32  
33  
34  
35  
36  
37  
38  
39  
40  
41  
42  
43  
44  
45  
46  
47  
48  
49  
50  
51  
52  
53  
54  
55  
56  
57  
58  
59  
60



## Focus on the Patient

**What is the context?**



The immune systems of immunocompromised patients is substantially weakened compared to the general older adult population.

**What is new?**



Few studies have estimated burden or cost of herpes zoster in immunocompromised patients. By using information in general practitioner records and hospital databases, this study assesses the burden of herpes zoster and associated healthcare costs in immunocompromised patients and those who are not immunocompromised in different age groups.

**What is the impact?**



The burden of herpes zoster and resulting healthcare costs are higher in the older population. Immunocompromised patients incurred higher healthcare utilisation and costs compared with those who were not immunocompromised. Finally, postherpetic neuralgia, a complication of herpes zoster, further increased healthcare utilisation and costs.

81x45mm (300 x 300 DPI)

Panel A

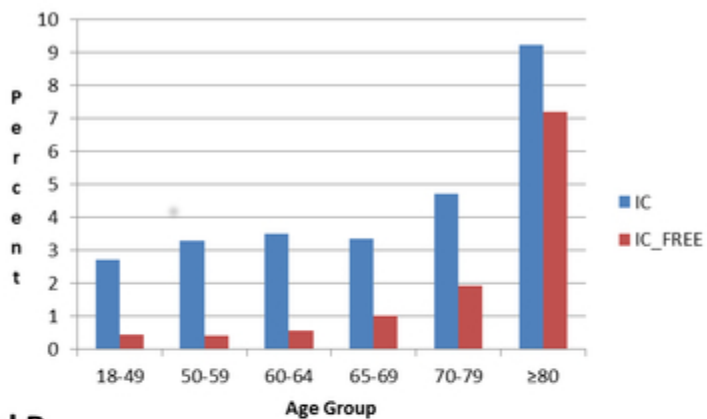

Panel B

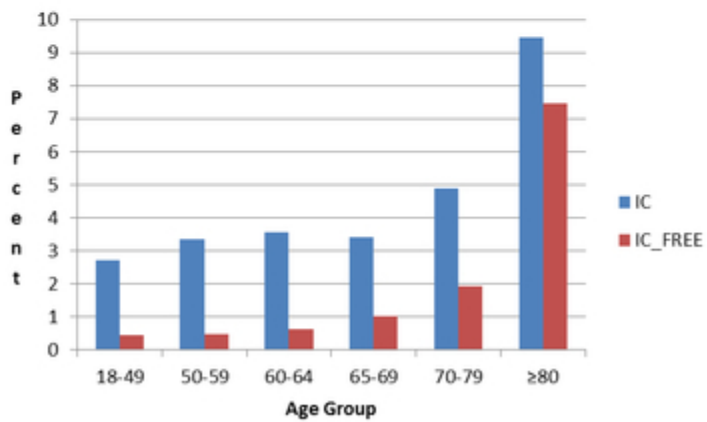

34x41mm (300 x 300 DPI)

1  
2  
3  
4  
5  
6  
7  
8  
9  
10  
11  
12  
13  
14  
15  
16  
17  
18  
19  
20  
21  
22  
23  
24  
25  
26  
27  
28  
29  
30  
31  
32  
33  
34  
35  
36  
37  
38  
39  
40  
41  
42  
43  
44  
45  
46  
47  
48  
49  
50  
51  
52  
53  
54  
55  
56  
57  
58  
59  
60

**Panel A**

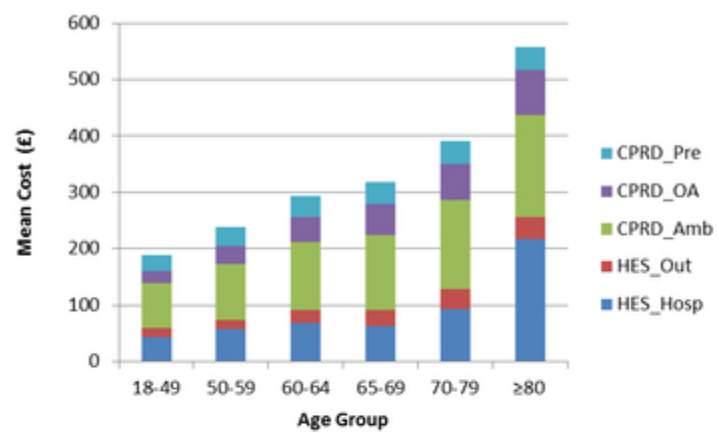

**Panel B**

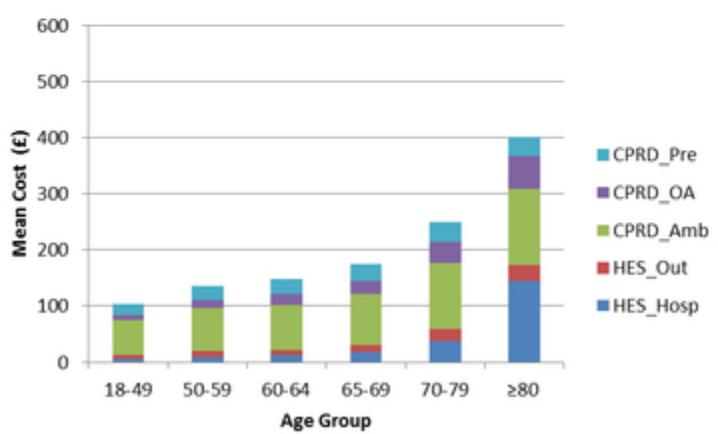

34x45mm (300 x 300 DPI)

**Panel A**

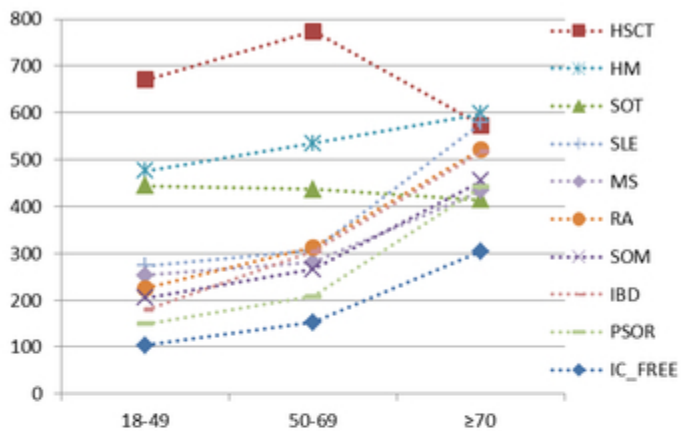

**Panel B**

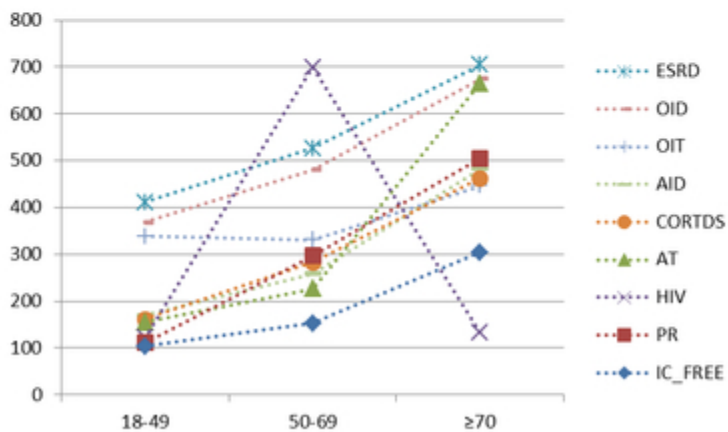

34x47mm (300 x 300 DPI)

## Supplementary Material

# HERPES ZOSTER RELATED HEALTHCARE BURDEN AND COSTS IN IMMUNOCOMPROMISED (IC) AND IC-FREE POPULATIONS IN ENGLAND: AN OBSERVATIONAL RETROSPECTIVE DATABASE ANALYSIS

Desmond Curran, Manjit Hunjan, Amale El Ghachi, Yassine El Hahi,  
Veronique Bianco, Germano Ferreira

BMJ Open

### **Immunocompromised population**

The immunocompromised (IC) population, referred to as the IC cohort hereafter, included eligible subjects reporting at least one of the following conditions or therapies at any time before 31<sup>st</sup> March 2012:

- Hematopoietic stem cell transplant (HSCT);
- Solid organ transplantation (SOT);
- Solid organ malignancies (SOM);
- Hematological malignancies (HM): Leukemia, Lymphoma, Myeloma;
- Autoimmune diseases (AID):
  - Rheumatoid Arthritis (RA);
  - Systemic *Lupus erythematosus* (SLE);
  - Inflammatory Bowel Disease (IBD);
  - Psoriasis (PSOR);
  - Multiple sclerosis (MS);
  - Polymyalgia rheumatica (PR) and;
  - Autoimmune thyroiditis (AT).
- Human immunodeficiency virus (HIV);
- End-stage renal disease (ESRD);
- Corticosteroid exposure (CORTDS);
- Other immunosuppressive therapy (OIT) exposure;
- Other immunodeficiency (OID) conditions.

For autoimmune diseases, each disease was considered as a separate IC condition. Any subject with a code for any IC condition listed above at any time in their record was excluded from the IC-free cohort. Only subjects that were part of IC conditions based on treatment administration (“Corticosteroid exposure” and/or the “Other immunosuppressive therapy exposure” IC conditions) had an end of follow-up based on prescriptions and could present a gap of exposure in the IC cohort between the end of exposure in that IC condition and the beginning of the next one, if any, during which they could not be considered as IC.



### **IC Matching**

The IC-free matched population included a random sample of the IC-free population described above matched to the subjects of the IC population with a ratio of 1:1 (IC: IC-free subjects) when possible. The matching factors were:

- Hospital Episode Statistics (HES) linkage eligibility;
- The year of birth of the subject;
- The gender of the subject, and;
- The practice geographical region.

In addition, the IC-free subjects were included in the study at their corresponding matched IC subject's index date and should not have reported any history of HZ before the matched IC index date.

### **Herpes Zoster (HZ) Diagnosis**

HZ cases identified in the Clinical Practice Research Datalink (CPRD) database were defined as subjects reporting at least one HZ-related READ code. Incident cases were subjects with at least 12 months of active registration in CPRD and no past record of HZ diagnosis during at least 12 months prior to inclusion or even before in their available medical records. HZ cases were identified in HES using the International Classification of Diseases-10th revision (ICD-10) codes that appeared in the diagnosis fields. If HZ diagnosis codes were recorded in both HES and the CPRD, the earliest event date was considered as the onset date.

**Supplementary Table 1: Post-herpetic neuralgia**

| Source | READ code/ICD-10 code | Complication                                 |
|--------|-----------------------|----------------------------------------------|
| CPRD   | A531.11               | Post-herpetic neuralgia                      |
| CPRD   | A531200               | Post-herpetic trigeminal neuralgia           |
| CPRD   | A531300               | Post-herpetic polyneuropathy                 |
| CPRD   | A531500               | Post-zoster neuralgia                        |
| CPRD   | A531511               | Post-herpetic neuralgia                      |
| CPRD   | F300.00               | Post-herpetic trigeminal neuralgia           |
| HES    | B02.2                 | Zoster with other nervous system involvement |

CPRD, Clinical Practice Research Datalink; HES, Hospital Episode Statistics; ICD-10, International Classifications of Diseases-10<sup>th</sup> revision.

Complications (other than post-herpetic neuralgia [PHN]) were grouped into four main categories for the analyses:

- Neurological (other than PHN): i.e. HZ meningitis, HZ encephalitis, Ramsay - Hunt syndrome;
- Ocular HZ (i.e. HZ eyelid; HZ iridocyclitis, etc);
- Disseminated HZ;
- Other HZ complications (i.e. HZ otitis externa and unspecified complications).

### **Healthcare costing**

- HZ subjects without PHN:
  - Period = the HZ case onset date -7 prior to the case onset date + 30 days (a);
- HZ subjects reporting a PHN event within 365 days from the HZ case onset date, two analyses periods were used:
  - Period 1 = the HZ case onset date -7 prior to the case onset date + 90 days (b);
  - Period 2 = the HZ case onset date -7 prior to the case onset date + 365 days (c);

1  
2  
3 The analysis tables were generated for all HZ subjects from -7 days up to 90 and 365 days  
4 after HZ event; i.e. HZ + PHN 90 Days: (a) + (b), HZ + PHN 365 Days: (a) + (c).  
5  
6

7 Additionally, main categories of resource utilization and cost tables were presented for the  
8 following sub-populations for a 7-day period up to the case onset date up to 30 days, 90 days  
9 and 365 days post-initial HZ onset date:  
10  
11

- 12 • HZ only (i.e. no PHN and no HZ-related complication);
- 13
- 14 • HZ and PHN within 1 year of HZ event;
- 15
- 16 • HZ and other HZ-related complications but no PHN (overall and by complications  
17 sub-categories):
  - 18 ○ Neurological;
  - 19
  - 20 ○ Ocular;
  - 21
  - 22 ○ Cutaneous;
  - 23
  - 24 ○ Other complications.
  - 25
  - 26
  - 27
  - 28
  - 29
  - 30
  - 31

32 A detailed mapping linking the exact event definition variables and criteria to the reference  
33 unit cost was used. The unit costs for each type of resource were obtained from the following  
34 reference sources:  
35  
36

- 37 • General practitioner (GP) prescribed medication costs: British National Formulary  
38 (BNF) 65 and 70. The quantity prescribed and pack type were used to estimate the  
39 prescription costs for each drug (prodcode) of interest. A detailed mapping was used  
40 to link the exact cost of prodcode quantity and packtype for each drug;  
41  
42
- 43 • Primary care costs: Personal Social Services Research Unit (PSSRU, Curtis L,  
44 Personal Social Services Research Unit. Unit costs of Health & Social Care 2014.  
45 University of Kent, 2014);  
46
- 47 • HES inpatient hospitalisation and HES outpatient specialist costs: NHS Tariffs  
48 (National Schedule of Reference Costs, 2013/2014).  
49  
50  
51  
52  
53  
54  
55  
56  
57  
58  
59  
60

**Supplementary Table 2: List of medications**

| <b>Treatment Groups</b>   | <b>Description</b> |
|---------------------------|--------------------|
| Antiviral                 | Aciclovir          |
|                           | Famciclovir        |
|                           | Valacyclovir       |
| NSAIDs                    | Aspirin            |
|                           | Ibuprofen          |
| COX-2                     | Paracetamol        |
| Topical Agents            | Lidocaine          |
|                           | Capsaicin          |
| Anticonvulsants           | Gabapentin         |
|                           | Pregabalin         |
| Tricyclic antidepressants | Amitriptyline      |
|                           | Nortriptyline      |
|                           | Desipramine        |
| Corticosteroids           | Prednisolone       |
| Opioid analgesics         | Tramadol           |
|                           | Morphine           |
|                           | Oxycodone          |
|                           | Methadone          |

**Supplementary Table 3: Ambulatory and Outpatient Costs**

|                                                 | Consultation type             | Details                                                                                                                                                                                                                                   | Tariff Code | Cost |
|-------------------------------------------------|-------------------------------|-------------------------------------------------------------------------------------------------------------------------------------------------------------------------------------------------------------------------------------------|-------------|------|
| AMBULATORY<br>AND OTHER<br>AMBULATORY<br>VISITS | GP surgery<br>consultation    | Per patient contact lasting 11.7 minutes, without qualification costs, excluding direct care staff costs <sup>1</sup>                                                                                                                     | N/A         | £35  |
|                                                 | GP clinic consultation        | Per patient contact lasting 17.2 minutes, without qualification costs, excluding direct care staff costs <sup>1</sup>                                                                                                                     | N/A         | £50  |
|                                                 | GP telephone<br>consultation  | Per patient contact lasting 7.1 minutes, without qualification costs, excluding direct staff care costs <sup>1</sup>                                                                                                                      | N/A         | £21  |
|                                                 | GP home visit                 | Per out of surgery visit lasting 23.4 minutes (including 12 minutes travel) without qualification costs, excluding direct care staff costs <sup>2</sup><br><br>Inflated to 2014 prices using the HCHS annual price inflation <sup>1</sup> | N/A         | £87  |
|                                                 | GP home visit out of<br>hours | Ratio of direct to indirect time; Out of surgery visits (home visits and clinics; includes travel time) - 1:0.99 <sup>2</sup>                                                                                                             | N/A         | £86  |

|                                        | Consultation type                     | Details                                                                                                                                                                                                                                | Tariff Code | Cost |
|----------------------------------------|---------------------------------------|----------------------------------------------------------------------------------------------------------------------------------------------------------------------------------------------------------------------------------------|-------------|------|
|                                        | GP practice nurse consultation        | Per 15.5 minutes surgery consultation @ £44/hour (excluding qualification costs) <sup>1</sup>                                                                                                                                          | N/A         | £11  |
|                                        | GP results by phone                   | Assume same as GP Telephone Consultation<br>Per patient contact lasting 7.1 minutes, without qualification costs, excluding direct staff care costs <sup>1</sup>                                                                       | N/A         | £21  |
|                                        | GP time spent on phone/writing letter | Ratio of direct to indirect time; Face-to-face time (excludes travel time). Using cost of GP consultation in surgery <sup>1</sup>                                                                                                      | N/A         | £23  |
|                                        | GP time on administration             | Ratio of direct to indirect time; Face-to-face time (excludes travel time). Using cost of GP consultation in surgery <sup>1</sup>                                                                                                      | N/A         | £8   |
| AMBULATORY AND OTHER AMBULATORY VISITS | District nurse visit                  | Mean average cost for a face-to-face contact in district nursing services (based on NHS reference costs) was £39 in 2012/2013 <sup>2</sup><br>Hospital and community health services annual price inflation for 2013/2014 <sup>1</sup> | N/A         | £40  |

|                                      | Consultation type                          | Details                                                                                                                                                                                                                                       | Tariff Code | Cost |
|--------------------------------------|--------------------------------------------|-----------------------------------------------------------------------------------------------------------------------------------------------------------------------------------------------------------------------------------------------|-------------|------|
|                                      | Health visitor visit                       | Mean average cost for a face-to-face contact in health visiting services (based on NHS reference costs) was £51 in for 2012/2013 <sup>2</sup><br><br>Hospital and community health services annual price inflation for 2013/2014 <sup>1</sup> | N/A         | £52  |
| OUTPATIENT<br>HOSPITAL<br>ATTENDANCE | Anaesthetics,<br>outpatient attendance     | Consultant Led; WF01B: First attendance Single professional <sup>3</sup>                                                                                                                                                                      | 190         | £125 |
|                                      | Dermatology,<br>outpatient attendance      | Consultant Led; WF01B: First attendance Single professional <sup>3</sup>                                                                                                                                                                      | 330         | £104 |
|                                      | General Medicine,<br>Outpatient Attendance | Consultant Led; WF01B: First attendance Single professional <sup>3</sup>                                                                                                                                                                      | 300         | £178 |
|                                      | Ophthalmology,<br>Outpatient Attendance    | Consultant Led; WF01B: First attendance Single professional <sup>3</sup>                                                                                                                                                                      | 130         | £119 |

|  | <b>Consultation type</b>                  | <b>Details</b>                                                    | <b>Tariff Code</b> | <b>Cost</b> |
|--|-------------------------------------------|-------------------------------------------------------------------|--------------------|-------------|
|  | A&E Attendance                            | Category 3 investigation with category 1-3 treatment <sup>3</sup> | VB03Z              | £163        |
|  | Pain Management,<br>Outpatient Attendance | Consultant led - Outpatient Attendance <sup>4</sup>               | 191                | £138        |

For peer review only



|                                      | Consultation type                             | Details                                             | Tariff Code | Cost |
|--------------------------------------|-----------------------------------------------|-----------------------------------------------------|-------------|------|
| OUTPATIENT<br>HOSPITAL<br>ATTENDANCE | Neurosurgery,<br>Outpatient Attendance        | Consultant led - Outpatient Attendance <sup>4</sup> | 150         | £182 |
|                                      | Palliative Medicine,<br>Outpatient Attendance | Consultant led - Outpatient Attendance <sup>4</sup> | 315         | £167 |
|                                      | Neurology, Outpatient<br>Attendance           | Consultant led - Outpatient Attendance <sup>4</sup> | 400         | £174 |

GP, General Practitioner; N/A, not available; NHS, National Health Service; HCHS, community health services; A&E, accident and emergency;  
Source:

1. Curtis L, Personal Social Services Research Unit. Unit costs of Health & Social Care 2014. University of Kent, 2014.

2. Curtis L, Personal Social Services Research Unit. Unit costs of Health & Social Care 2013. University of Kent, 2013

3. 2014/5 National Tariff Payment System. Annex 5A National Prices, 17 December 2013

<https://www.gov.uk/government/publications/national-tariff-payment-system-2014-to-2015>

4. National Schedule of Reference costs 2013-14

[https://www.gov.uk/government/uploads/system/uploads/attachment\\_data/file/397469/03a\\_2013-14\\_National\\_Schedule\\_-\\_CF-NET\\_updated.xls](https://www.gov.uk/government/uploads/system/uploads/attachment_data/file/397469/03a_2013-14_National_Schedule_-_CF-NET_updated.xls)

**Supplementary Table 4: Hospital Inpatient costs**

| Diagnosis Code | Detail                                  | Average tariff per admission |
|----------------|-----------------------------------------|------------------------------|
| B020           | Zoster encephalitis                     | £5,038.39                    |
| B021           | Zoster meningitis                       | £2,065.47                    |
| B022           | Zoster other nervous system involvement | £1,440.48                    |
| B023           | Zoster with ocular diseases             | £2,226.36                    |
| B027           | Disseminated Zoster                     | £2,255.30                    |
| B028           | Zoster with other complications         | £2,060.70                    |
| B029           | Zoster without complications            | £1,790.57                    |

Source: Hospital Episode Statistics (HES) Admission data IMS, 2013/14

### **HZ treatment prescriptions**

All HZ treatment prescriptions, defined according to British National Formulary (BNF) indication and clinical expert input, were identified by product codes from the HZ TREATMENT CPRD Procodes List, and were extracted from the CPRD Therapy dataset.

### **Analysis datasets used**

HZ treatments prescriptions (CPRD Therapy dataset);  
 CPRD Ambulatory Visits (CPRD Consultation dataset);  
 Specialists Referrals by GP (CPRD Referral dataset);  
 Hospitalizations (HES Inpatient: HES\_DIAGNOSIS\_EPI dataset);  
 Outpatient Visits (HESOP Clinical dataset);  
 Nursing home visits and Time off sick (CPRD Clinical dataset).

**Supplementary Table 5: Costs by category, IC status, time period of analysis and age Groups**

| Category                             | 18-49<br>YOA | 50-59<br>YOA | 60-64<br>YOA | 65-69<br>YOA | 70-79<br>YOA | ≥80<br>YOA   |
|--------------------------------------|--------------|--------------|--------------|--------------|--------------|--------------|
| <b>IC Population (≤90 days)</b>      |              |              |              |              |              |              |
| Hospitalizations                     | 44.2         | 52.4         | 66.7         | 61.2         | 89.3         | 205.5        |
| HES outpatient consultations/visits  | 12.4         | 11.2         | 17.8         | 18.6         | 21           | 21.3         |
| CPRD ambulatory visits               | 72.9         | 82.3         | 92.1         | 97.5         | 110.8        | 126.5        |
| CPRD other ambulatory visits         | 16.1         | 22           | 27.7         | 31           | 34.6         | 41.8         |
| CPRD prescriptions                   | 27.6         | 31.1         | 31.9         | 33.3         | 33.9         | 31.9         |
| <b>Total</b>                         | <b>173.2</b> | <b>199.0</b> | <b>236.2</b> | <b>241.6</b> | <b>289.6</b> | <b>427.0</b> |
| <b>IC Population (≤365 days)</b>     |              |              |              |              |              |              |
| Hospitalizations                     | 44.2         | 56.7         | 68           | 62.4         | 93.8         | 216.5        |
| HES outpatient consultations/visits  | 15.1         | 16.1         | 23.9         | 28.1         | 34.4         | 40.1         |
| CPRD ambulatory visits               | 80.6         | 100.1        | 120.2        | 134.5        | 158.1        | 180.8        |
| CPRD other ambulatory visits         | 20.7         | 31.6         | 44.9         | 54.4         | 63.2         | 78.8         |
| CPRD prescriptions                   | 28.7         | 33.3         | 37.3         | 38.1         | 42.2         | 40.8         |
| <b>Total</b>                         | <b>189.3</b> | <b>237.8</b> | <b>294.2</b> | <b>317.4</b> | <b>391.7</b> | <b>557.0</b> |
| <b>IC-Free Population (≤90 days)</b> |              |              |              |              |              |              |
| Hospitalizations                     | 6.3          | 8.5          | 11.5         | 17.5         | 36.4         | 136.5        |
| HES outpatient consultations/visits  | 5.2          | 7.8          | 8.2          | 10.4         | 13.9         | 18.2         |
| CPRD ambulatory visits               | 59           | 66.7         | 69.6         | 72.7         | 88.8         | 102.8        |
| CPRD other ambulatory visits         | 8            | 11.2         | 12.9         | 16.9         | 21.2         | 32.8         |
| CPRD prescriptions                   | 19.7         | 24.7         | 24.6         | 28           | 29.4         | 29.4         |
| <b>Total</b>                         | <b>98.2</b>  | <b>118.9</b> | <b>126.8</b> | <b>145.5</b> | <b>189.7</b> | <b>319.7</b> |

| <b>IC-Free Population (<math>\leq 365</math> days)</b> |              |              |              |              |              |              |
|--------------------------------------------------------|--------------|--------------|--------------|--------------|--------------|--------------|
| Hospitalizations                                       | 6.3          | 8.9          | 12           | 17.9         | 37           | 144          |
| HES outpatient consultations/visits                    | 5.7          | 10.8         | 10           | 13.4         | 22.7         | 28.4         |
| CPRD ambulatory visits                                 | 63           | 75.8         | 80.4         | 90           | 117.3        | 135.9        |
| CPRD other ambulatory visits                           | 8.8          | 14.2         | 18.6         | 23.2         | 36.8         | 58.7         |
| CPRD prescriptions                                     | 20           | 25.6         | 26.8         | 29.9         | 34.9         | 34.1         |
| <b>Total</b>                                           | <b>103.8</b> | <b>135.3</b> | <b>147.7</b> | <b>174.4</b> | <b>248.6</b> | <b>401.0</b> |

HES, Hospital Episode Statistics; IC, immunocompromised; CPRD, Clinical Practice Research Datalink; CPRD; YOA, years of age

**Supplementary Figure 1: Healthcare costs for by HES-linked matched IC (Panel A) and IC-free cohort (Panel B) for the analysis period 7 days prior to 90 days post initial HZ onset**

**Panel A**

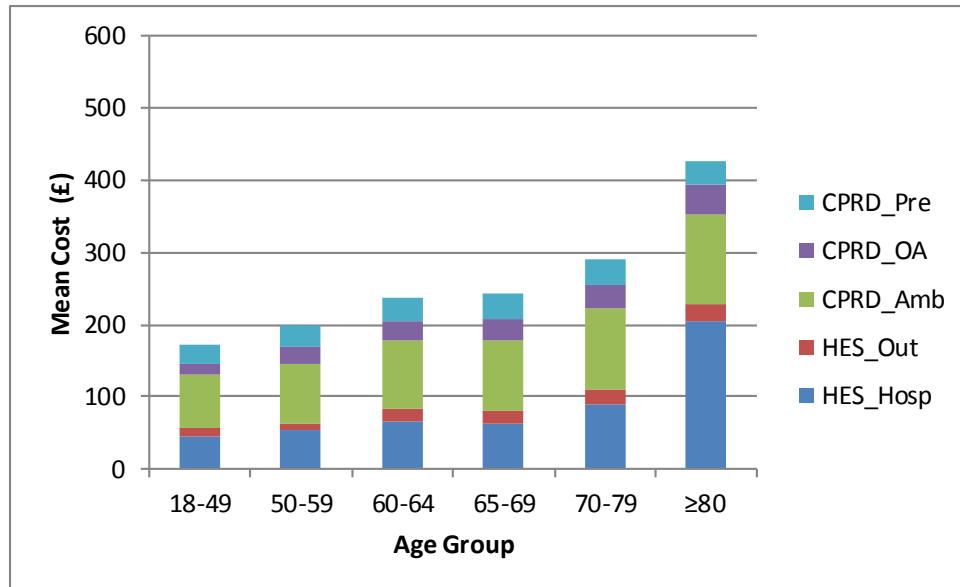

**Panel B**

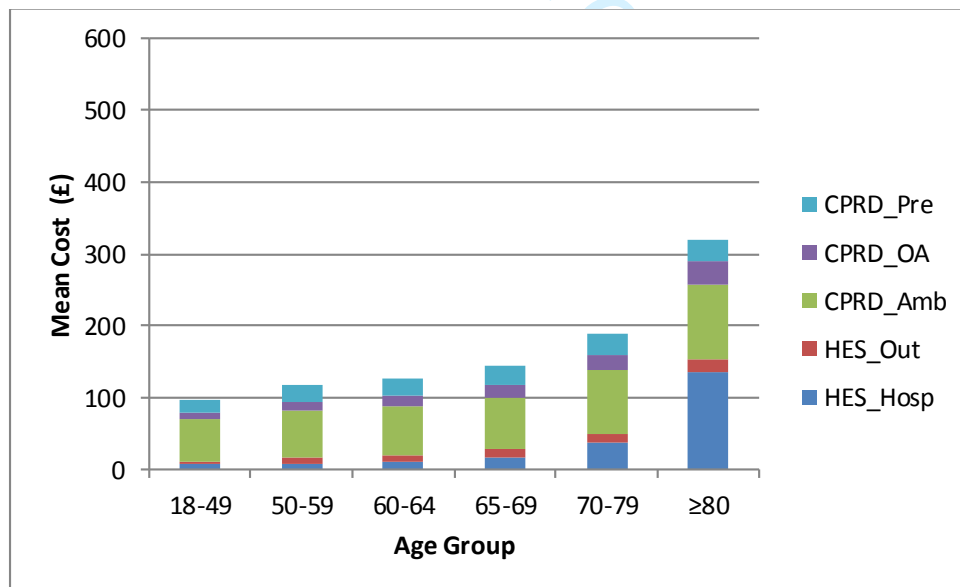

For HZ subjects without PHN: data from 7 days prior to 30 days post HZ onset included;

For HZ subjects with PHN: data from 7 days prior to 90 days post HZ onset included;

Abbreviations: HES, Hospital Episode Statistics; IC, immunocompromised; HZ, herpes zoster; PHN, post-herpetic neuralgia; CPRD, Clinical Practice Research Datalink; CPRD\_Pre, CPRD Prescriptions; CPRD\_OA, CPRD Other Ambulatory Visits; CPRD\_Amb, CPRD Ambulatory Visits; HES\_Out, HES Outpatient consultation; HES\_Hosp, HES Hospital admission.

**Supplementary Figure 2: Healthcare Costs for each IC condition by age group for the analysis period 7 days prior to 90 days post initial HZ onset**

**Panel A**

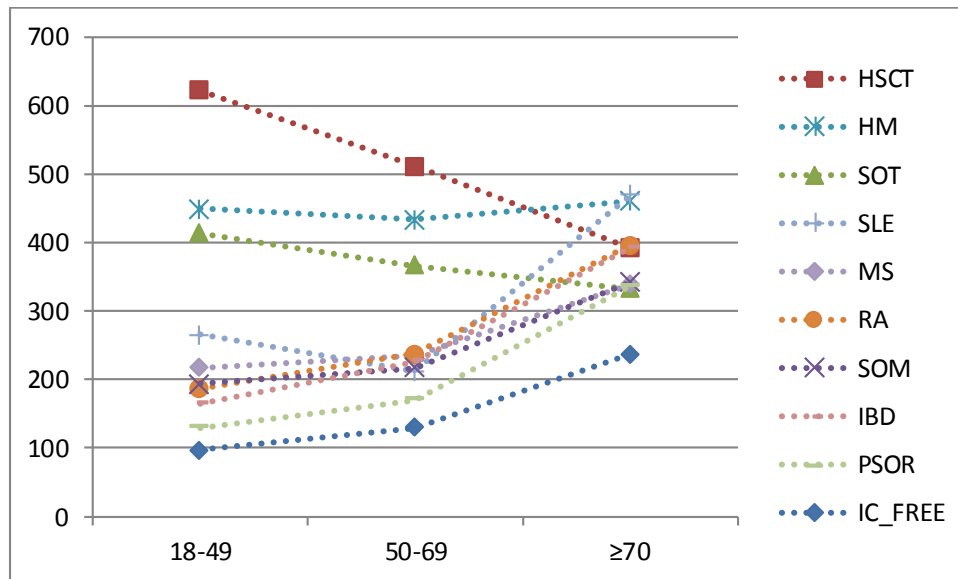

**Panel B**

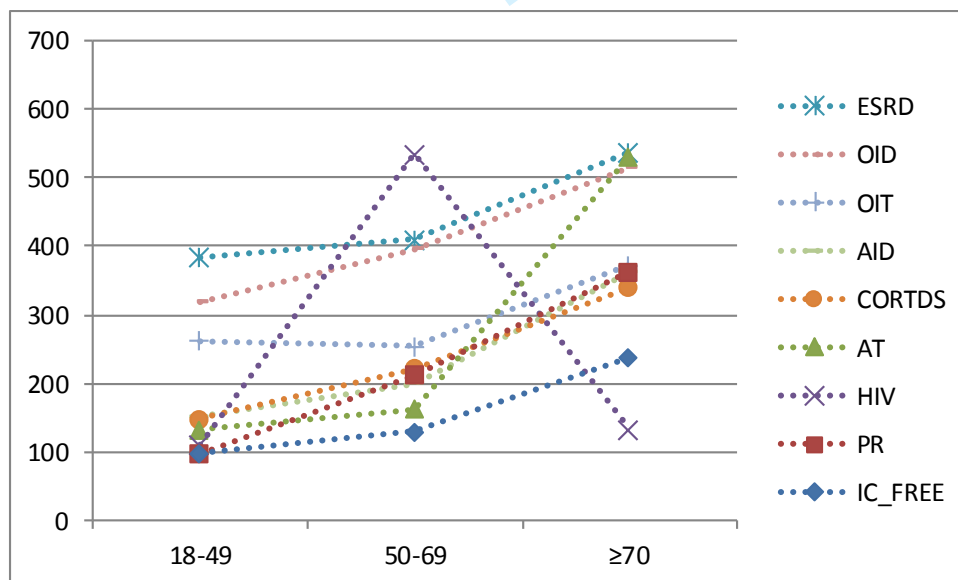

For HZ subjects without PHN: data from 7 days prior to 30 days post HZ onset included;  
 For HZ subjects with PHN: data from 7 days prior to 90 days post HZ onset included;

Abbreviations: HES, Hospital Episode Statistics; IC, immunocompromised; HZ, herpes zoster; PHN, post-herpetic neuralgia; HSCT, hematopoietic stem cell transplantation; HM, haematological malignancies; SOT, solid organ transplantations; SLE, systemic lupus erythematosus; MS, multiple sclerosis; RA, rheumatoid arthritis; SOM, solid organ malignancies; IBD, inflammatory bowel syndrome; PSOR, psoriasis; ESRD, end-stage renal disease; OID, other immunodeficiency; OIT, other immunosuppressive therapy; AID, autoimmune diseases; CORTDS, corticosteroid exposure; AT, autoimmune thyroiditis; HIV, human immunodeficiency virus; PR, polymyalgia rheumatica.

**Supplementary Table 6: Non-HZ related Hospital Inpatient Stay for the period 7 days to 365 days post initial-HZ onset**

| Age groups<br>(YOA) | IC cohort     |               |              |             | IC-free cohort |              |              |             |
|---------------------|---------------|---------------|--------------|-------------|----------------|--------------|--------------|-------------|
|                     | N             | Events        | Subjects     | Mean        | N              | Events       | Subjects     | Mean        |
| 18-49               | 3,039         | 1,881         | 259          | 0.62        | 2,078          | 193          | 56           | 0.09        |
| 50-59               | 3,408         | 3,267         | 337          | 0.96        | 2,834          | 251          | 61           | 0.09        |
| 60-64               | 2,550         | 2,897         | 293          | 1.14        | 2,308          | 309          | 63           | 0.13        |
| 65-69               | 2,753         | 3,867         | 371          | 1.40        | 2,658          | 434          | 108          | 0.16        |
| 70-79               | 5,429         | 9,020         | 838          | 1.66        | 5,454          | 2,556        | 379          | 0.47        |
| ≥80                 | 3,863         | 9,928         | 840          | 2.57        | 3,171          | 4,119        | 457          | 1.30        |
| <b>Total</b>        | <b>21,042</b> | <b>30,860</b> | <b>2,938</b> | <b>1.47</b> | <b>18,503</b>  | <b>7,862</b> | <b>1,124</b> | <b>0.42</b> |

Abbreviations: IC, immunocompromised; HZ, herpes zoster; N, number of participant; YOA, years of age

## STROBE Statement—checklist of items that should be included in reports of observational studies

|                           | Item No | Recommendation                                                                                                                                                                                                                                                                                                                                                                                                                                                                                                                                                                                                                                                                                   |                              |
|---------------------------|---------|--------------------------------------------------------------------------------------------------------------------------------------------------------------------------------------------------------------------------------------------------------------------------------------------------------------------------------------------------------------------------------------------------------------------------------------------------------------------------------------------------------------------------------------------------------------------------------------------------------------------------------------------------------------------------------------------------|------------------------------|
| <b>Title and abstract</b> | 1       | (a) Indicate the study's design with a commonly used term in the title or the abstract<br>(b) Provide in the abstract an informative and balanced summary of what was done and what was found                                                                                                                                                                                                                                                                                                                                                                                                                                                                                                    | Pages 1 and 2,3<br>Pages 2,3 |
| <b>Introduction</b>       |         |                                                                                                                                                                                                                                                                                                                                                                                                                                                                                                                                                                                                                                                                                                  |                              |
| Background/rationale      | 2       | Explain the scientific background and rationale for the investigation being reported                                                                                                                                                                                                                                                                                                                                                                                                                                                                                                                                                                                                             | Page 5,6                     |
| Objectives                | 3       | State specific objectives, including any prespecified hypotheses                                                                                                                                                                                                                                                                                                                                                                                                                                                                                                                                                                                                                                 | Page 6                       |
| <b>Methods</b>            |         |                                                                                                                                                                                                                                                                                                                                                                                                                                                                                                                                                                                                                                                                                                  |                              |
| Study design              | 4       | Present key elements of study design early in the paper                                                                                                                                                                                                                                                                                                                                                                                                                                                                                                                                                                                                                                          | Page 6,7                     |
| Setting                   | 5       | Describe the setting, locations, and relevant dates, including periods of recruitment, exposure, follow-up, and data collection                                                                                                                                                                                                                                                                                                                                                                                                                                                                                                                                                                  | Pages 6-8                    |
| Participants              | 6       | (a) <i>Cohort study</i> —Give the eligibility criteria, and the sources and methods of selection of participants. Describe methods of follow-up<br><i>Case-control study</i> —Give the eligibility criteria, and the sources and methods of case ascertainment and control selection. Give the rationale for the choice of cases and controls<br><i>Cross-sectional study</i> —Give the eligibility criteria, and the sources and methods of selection of participants<br>(b) <i>Cohort study</i> —For matched studies, give matching criteria and number of exposed and unexposed<br><i>Case-control study</i> —For matched studies, give matching criteria and the number of controls per case | Page 6                       |
| Variables                 | 7       | Clearly define all outcomes, exposures, predictors, potential confounders, and effect modifiers. Give diagnostic criteria, if applicable                                                                                                                                                                                                                                                                                                                                                                                                                                                                                                                                                         | Pages 8,9                    |
| Data sources/measurement  | 8*      | For each variable of interest, give sources of data and details of methods of assessment (measurement). Describe comparability of assessment methods if there is more than one group                                                                                                                                                                                                                                                                                                                                                                                                                                                                                                             | Pages 8,9                    |
| Bias                      | 9       | Describe any efforts to address potential sources of bias                                                                                                                                                                                                                                                                                                                                                                                                                                                                                                                                                                                                                                        | Page 9                       |
| Study size                | 10      | Explain how the study size was arrived at                                                                                                                                                                                                                                                                                                                                                                                                                                                                                                                                                                                                                                                        | Pages 9,10                   |
| Quantitative variables    | 11      | Explain how quantitative variables were handled in the analyses. If applicable, describe which groupings were chosen and why                                                                                                                                                                                                                                                                                                                                                                                                                                                                                                                                                                     | Pages 8,9                    |
| Statistical methods       | 12      | (a) Describe all statistical methods, including those used to control for confounding<br>(b) Describe any methods used to examine subgroups and interactions<br>(c) Explain how missing data were addressed<br>(d) <i>Cohort study</i> —If applicable, explain how loss to follow-up was addressed<br><i>Case-control study</i> —If applicable, explain how matching of cases and controls was addressed                                                                                                                                                                                                                                                                                         | N/A                          |



*Cross-sectional study*—If applicable, describe analytical methods taking account of sampling strategy

---

(e) Describe any sensitivity analyses

## Results

|                          |     |                                                                                                                                                                                                                                                                                                                                                                                                               |             |
|--------------------------|-----|---------------------------------------------------------------------------------------------------------------------------------------------------------------------------------------------------------------------------------------------------------------------------------------------------------------------------------------------------------------------------------------------------------------|-------------|
| Participants             | 13* | (a) Report numbers of individuals at each stage of study—eg numbers potentially eligible, examined for eligibility, confirmed eligible, included in the study, completing follow-up, and analysed<br>(b) Give reasons for non-participation at each stage<br>(c) Consider use of a flow diagram                                                                                                               | Pages 9,10  |
| Descriptive data         | 14* | (a) Give characteristics of study participants (eg demographic, clinical, social) and information on exposures and potential confounders<br>(b) Indicate number of participants with missing data for each variable of interest<br>(c) <i>Cohort study</i> —Summarise follow-up time (eg, average and total amount)                                                                                           | N/A         |
| Outcome data             | 15* | <i>Cohort study</i> —Report numbers of outcome events or summary measures over time<br><i>Case-control study</i> —Report numbers in each exposure category, or summary measures of exposure<br><i>Cross-sectional study</i> —Report numbers of outcome events or summary measures                                                                                                                             | N/A         |
| Main results             | 16  | (a) Give unadjusted estimates and, if applicable, confounder-adjusted estimates and their precision (eg, 95% confidence interval). Make clear which confounders were adjusted for and why they were included<br>(b) Report category boundaries when continuous variables were categorized<br>(c) If relevant, consider translating estimates of relative risk into absolute risk for a meaningful time period | N/A         |
| Other analyses           | 17  | Report other analyses done—eg analyses of subgroups and interactions, and sensitivity analyses                                                                                                                                                                                                                                                                                                                | Pages 10,11 |
| <b>Discussion</b>        |     |                                                                                                                                                                                                                                                                                                                                                                                                               |             |
| Key results              | 18  | Summarise key results with reference to study objectives                                                                                                                                                                                                                                                                                                                                                      | Page 11,12  |
| Limitations              | 19  | Discuss limitations of the study, taking into account sources of potential bias or imprecision. Discuss both direction and magnitude of any potential bias                                                                                                                                                                                                                                                    | Pages 14    |
| Interpretation           | 20  | Give a cautious overall interpretation of results considering objectives, limitations, multiplicity of analyses, results from similar studies, and other relevant evidence                                                                                                                                                                                                                                    | Pages 14    |
| Generalisability         | 21  | Discuss the generalisability (external validity) of the study results                                                                                                                                                                                                                                                                                                                                         | Pages 12,13 |
| <b>Other information</b> |     |                                                                                                                                                                                                                                                                                                                                                                                                               |             |
| Funding                  | 22  | Give the source of funding and the role of the funders for the present study and, if applicable, for the original study on which the present article is based                                                                                                                                                                                                                                                 | Page 15     |

\*Give information separately for cases and controls in case-control studies and, if applicable, for exposed and unexposed groups in cohort and cross-sectional studies.

**Note:** An Explanation and Elaboration article discusses each checklist item and gives methodological background and published examples of transparent reporting. The STROBE checklist is best used in conjunction with this article (freely available on the Web sites of PLoS Medicine at <http://www.plosmedicine.org/>, Annals of Internal Medicine at <http://www.annals.org/>, and Epidemiology at <http://www.epidem.com/>). Information on the STROBE Initiative is available at [www.strobe-statement.org](http://www.strobe-statement.org).

# BMJ Open

## HERPES ZOSTER RELATED HEALTHCARE BURDEN AND COSTS IN IMMUNOCOMPROMISED (IC) AND IC-FREE POPULATIONS IN ENGLAND: AN OBSERVATIONAL RETROSPECTIVE DATABASE ANALYSIS

|                                 |                                                                                                                                                                                                                                                                                                                                                                                         |
|---------------------------------|-----------------------------------------------------------------------------------------------------------------------------------------------------------------------------------------------------------------------------------------------------------------------------------------------------------------------------------------------------------------------------------------|
| Journal:                        | <i>BMJ Open</i>                                                                                                                                                                                                                                                                                                                                                                         |
| Manuscript ID                   | bmjopen-2018-023502.R2                                                                                                                                                                                                                                                                                                                                                                  |
| Article Type:                   | Research                                                                                                                                                                                                                                                                                                                                                                                |
| Date Submitted by the Author:   | 24-Jun-2019                                                                                                                                                                                                                                                                                                                                                                             |
| Complete List of Authors:       | Curran, Desmond; GlaxoSmithKline, Value Evidence<br>Hunjan, Manjit; GlaxoSmithKline<br>El Ghachi, Amale; Aixial France; Hoffmann-La Roche Ltd<br>El-Hahi, Yassine; Valesta, Mechelen, Belgium c/o GSK; Accord Research<br>Bianco, Veronique; GSK Vaccines, Research and Development Center<br>Ferreira, Germano; P-95 Epidemiology and pharmacovigilance services,<br>Heverlee, Belgium |
| <b>Primary Subject Heading</b>: | Health economics                                                                                                                                                                                                                                                                                                                                                                        |
| Secondary Subject Heading:      | Epidemiology, Infectious diseases                                                                                                                                                                                                                                                                                                                                                       |
| Keywords:                       | Herpes zoster, postherpetic neuralgia, immunocompromized, hospitalization, healthcare burden, herpes zoster treatment                                                                                                                                                                                                                                                                   |
|                                 |                                                                                                                                                                                                                                                                                                                                                                                         |

SCHOLARONE™  
Manuscripts

1  
2  
3  
4 **1 TITLE PAGE**

5  
6 **2 HERPES ZOSTER RELATED HEALTHCARE BURDEN AND COSTS IN**  
7  
8 **3 IMMUNOCOMPROMISED (IC) AND IC-FREE POPULATIONS IN ENGLAND: AN**  
9  
10 **4 OBSERVATIONAL RETROSPECTIVE DATABASE ANALYSIS**

11  
12  
13  
14 **5 Desmond Curran<sup>a</sup>, Manjit Hunjan<sup>b</sup>, Amale El Ghachi<sup>c</sup>, Yassine El Hahi<sup>d</sup>, Veronique**  
15  
16 **6 Bianco<sup>e</sup>, Germano Ferreira<sup>f</sup>**

17  
18  
19 **7 Affiliations**

20  
21  
22 <sup>a</sup>GSK, Wavre, Belgium; desmond.x.curran@gsk.com

23  
24 <sup>b</sup>GSK, Uxbridge, United Kingdom; manjit.k.hunjan@gsk.com

25  
26  
27 <sup>c</sup>AIXIAL, Boulogne-Billancourt, France c/o GSK, Wavre, Belgium; current affiliation F.

28  
29  
30 Hoffmann-La Roche Ltd., Basel, Switzerland ; amale.el\_ghachi@roche.com

31  
32 <sup>d</sup>Valesta, Mechelen, Belgium c/o GSK, Wavre, Belgium; current affiliation Accord Research

33  
34 s.r.o., Prague, Czech Republic ; yassineelhahi@gmail.com

35  
36 <sup>e</sup>GSK, Rockville, Maryland, United States; veronique.x.bianco@gsk.com

37  
38 <sup>f</sup>P-95 Epidemiology and pharmacovigilance services, Heverlee, Belgium; germano.ferreira@p-  
39  
40  
41 95.com

42  
43  
44 **17 Corresponding author**

45  
46  
47 Desmond Curran

48  
49 GSK, Avenue Fleming 20, 1300 Wavre, Belgium.

50  
51  
52 Email: [desmond.x.curran@gsk.com](mailto:desmond.x.curran@gsk.com)

53  
54  
55  
56  
57  
58  
59  
60

## 22 ABSTRACT

### 23 Objective

24 Individuals with immunocompromised (IC) conditions are at a higher risk of developing herpes  
25 zoster (HZ) than IC-free individuals. This study assessed the healthcare resource utilization  
26 (HCRU) burden and costs, of HZ in IC and IC-free individuals  $\geq 18$  years of age (YOA).

### 27 Methods

28 We conducted an observational retrospective study in a cohort of IC (N=621,588) and IC-free  
29 (N=621,588) individuals, matched by age, gender and GP practice region, contributing to the  
30 Clinical Practice Research Datalink database from 2000 to 2012 and linked to the Hospital Episode  
31 Statistics inpatient data. HCRU (i.e. primary and secondary care consultations, hospital inpatient  
32 stays, and treatment prescriptions) was analyzed from 7 days before to: (1) 30, (2) 365 days after  
33 the HZ diagnosis date for individuals with (1) HZ only (no post-herpetic neuralgia [PHN]) and (2)  
34 individuals with HZ and PHN only. Healthcare costs were computed by multiplying the number of  
35 units of resources utilized by the unit costs, summed across all HCRU categories to obtain a total  
36 cost per subject. Values were expressed in 2014 UK pound sterling (£) and presented for HZ cases  
37 overall, stratified by age (i.e. 18-49, 50-59, 60-69, 70-79 and  $\geq 80$  YOA) and IC status.

### 38 Results

39 The percentage of HZ cases requiring hospitalization was higher in IC individuals (2.7% *versus*  
40 0.4% in IC and IC-free individuals aged 18-49 YOA, respectively and 9.5% *versus* 7.5% in IC and  
41 IC-free individuals aged  $\geq 80$  YOA, respectively). Similarly, HZ-related mean treatment costs per  
42 subject were higher in IC individuals (£189 *versus* £104 in IC and IC-free individuals aged 18-49

1  
2  
3 43 YOA, respectively and £557 *versus* £401 in IC and IC-free individuals aged  $\geq 80$  YOA,  
4  
5 44 respectively). Costs varied considerably by IC condition.  
6  
7

## 8 45 **Conclusions**

9  
10  
11 46 Individuals with IC conditions, have a high burden of HZ, associated with an increased risk of HZ  
12  
13 and high HZ-related healthcare costs.  
14  
15  
16 48

## 17 18 19 49 **Keywords**

20  
21  
22 50 Herpes zoster, post-herpetic neuralgia, immunocompromized, hospitalization, healthcare burden,  
23  
24 51 herpes zoster treatment.  
25  
26  
27 52

## 53 STRENGTHS AND LIMITATIONS OF THIS STUDY

- 54 • The study is an observational retrospective descriptive study presenting the healthcare  
55 resource utilization and costs associated with herpes zoster (HZ) in both  
56 immunocompromised (IC) and IC-free populations aged  $\geq 18$  years of age in England.
- 57 • The IC population included 621,588 individuals who were registered in the Clinical  
58 Practice Research Datalink (CPRD) from January 2000 to March 2012 with  $\geq 12$ -month  
59 follow-up before being diagnosed with any of the selected 16 IC conditions and matched  
60 to the Hospital Episode Statistics (HES) database by age, gender and practice location to  
61 extract the IC-free population (N=621,588).
- 62 • The particularity of this study is that the design allowed calculation of IC condition  
63 prevalence rates, HZ incidence rates and occurrence of HZ-related healthcare utilization  
64 and costs at individual level in the same pre-defined population(s).
- 65 • This key study will provide data to be used in economic analyses to evaluate the value of  
66 vaccination in reducing the burden of HZ in IC populations.
- 67 • A limitation of the study is that the diagnoses were derived from administrative codes,  
68 which are recognized to be subject to miscoding or under-coding and are not validated  
69 against medical charts.

1  
2  
3 **71 LIST OF ABBREVIATIONS**  
4

5 72 £, 2014 UK pound sterling  
6

7 73 A&E, Accident and Emergency  
8

9 74 AID, autoimmune diseases  
10

11 75 ARDI, age-related decline in immunity  
12

13 76 AT, Autoimmune Thyroiditis  
14

15 77 BNF, British National Formulary  
16

17 78 CPRD, Clinical Practice Research Datalink  
18

19 79 GP, General Practitioner  
20

21 80 HCRU, healthcare resource utilization  
22

23 81 HES, Hospital Episode Statistics  
24

25 82 HIV, human immunodeficiency virus  
26

27 83 HM, hematological malignancies  
28

29 84 HSCT, hematopoietic stem cell transplantation  
30

31 85 HZ, herpes zoster  
32

33 86 HZ-Comp, HZ and complications with no PHN  
34

35 87 IC, immunocompromized  
36

37 88 ICD-10, International Classification of Diseases-10<sup>th</sup> revision  
38

39 89 ISAC, Independent Scientific Advisory Committee  
40

41 90 PHN, post-herpetic neuralgia  
42

43 91 PSSRU, Personal Social Services Research Unit  
44

45 92 PY, person-years  
46

47 93 RA, rheumatoid arthritis  
48

49 94 SLE, systemic lupus erythematosus  
50

51 95 SOT, solid organ transplantations  
52  
53  
54  
55  
56  
57  
58  
59  
60

- 1  
2  
3 96 UK, United Kingdom  
4  
5 97 US, United States  
6  
7 98 VZV-CMI, varicella zoster virus cell-mediated immunity  
8  
9 99 YOA, years of age  
10  
11  
12 100 ZVL, zoster vaccine live  
13  
14  
15  
16  
17  
18  
19  
20  
21  
22  
23  
24  
25  
26  
27  
28  
29  
30  
31  
32  
33  
34  
35  
36  
37  
38  
39  
40  
41  
42  
43  
44  
45  
46  
47  
48  
49  
50  
51  
52  
53  
54  
55  
56  
57  
58  
59  
60

For peer review only



## 101 INTRODUCTION

102 Varicella zoster virus cell-mediated immunity (VZV-CMI) inhibits the development of herpes  
103 zoster (HZ)<sup>1</sup>. Therefore, if for any reason VZV-CMI declines, the risk of HZ increases. Reasons  
104 for VZV-CMI decline can include, increasing age and immune suppression. VZV-CMI is not  
105 optimal in individuals with immunocompromised (IC) conditions and the age-specific incidence  
106 and severity of HZ greatly increases in IC patients due to underlying illness (e.g. human  
107 immunodeficiency virus [HIV] infection) or immunosuppressive therapies for autoimmune  
108 disease, malignancy, or organ transplantation<sup>2</sup>.

109 The incidence and severity of HZ is marked with an increase in people  $\geq 50$  years of age (YOA)  
110 due to an age-related decline in immunity (ARDI). In the United Kingdom (UK) the incidence of  
111 HZ rises from 7.1 per 1000 person-years (PY) among 60-64 year olds to 12.2 per 1000 PY among  
112 individuals aged  $\geq 85$  YOA<sup>3</sup>. Further to the impact of ARDI, a study by Forbes et al. in 2014  
113 investigated the increased risk for HZ in the UK population, associated with autoimmune  
114 conditions such as rheumatoid arthritis (RA), systemic lupus erythematosus (SLE); and chronic  
115 conditions such as diabetes mellitus, chronic obstructive pulmonary disease, chronic kidney  
116 disease, and asthma<sup>2</sup>. In addition to the increased risk of HZ in the various IC conditions these  
117 populations also experience increased severity of disease. In a study in Canada, Drolet et al.  
118 reported that individuals with an impaired immune status had HZ severity of illness scores, as  
119 measured by the Zoster Brief Pain Inventory, which were twice as high as individuals with normal  
120 immune function<sup>4,5</sup>. In a study in the United States (US), Yawn et al. reported that although 8% of  
121 HZ cases were in individuals who were immunocompromised, these individuals represented 23.8%  
122 of the total HZ-related costs<sup>6</sup>. The increase in healthcare costs was associated with higher rates of  
123 post-herpetic neuralgia (PHN) and non-pain complications in this group of individuals<sup>6</sup>.

1  
2  
3 124 This study aims to estimate the healthcare resource utilization of HZ in selected IC populations and  
4  
5 125 in an IC-free (i.e., immunocompetent) population aged  $\geq 18$  YOA in England. The clinical burden  
6  
7 126 of disease epidemiological results of the study are reported elsewhere<sup>7</sup>, and may be summarized as  
8  
9  
10 127 follows: the prevalence of IC conditions increased from 7.6% in individuals aged 18-44 YOA to  
11  
12 128 42.2% in individuals aged  $\geq 80$  YOA; the incidence rate of HZ in the IC cohort was 3.5/1000 PY  
13  
14 129 in individuals aged 18-49 YOA increasing to 12.6/1000 PY in individuals aged  $\geq 80$  YOA. In this  
15  
16 130 manuscript, we focus on the healthcare resource utilization and costs associated with HZ in both  
17  
18 131 IC and IC-free populations.

## 132 **METHODS**

133 The study was conducted as an observational retrospective descriptive study (e-track number:  
134 201615), in a cohort of eligible matched IC and IC-free populations (aged  $\geq 18$  YOA). The IC  
135 population included individuals who were registered in the Clinical Practice Research Datalink  
136 (CPRD) from January 2000 to March 2012 with  $\geq 12$ -month follow-up before being diagnosed with  
137 any of the selected 16 IC conditions (See Supplemental Material). The CPRD IC population cohort  
138 was linked to the Hospital Episode Statistics (HES) database and matched, using a 1:1 ratio, to a  
139 cohort of CPRD-HES linked IC-free population (N=621,588), by age, gender and practice  
140 location<sup>8</sup>. Individuals with a missing date of IC diagnosis were excluded from the study population.  
141 Clinical diagnoses were based on READ codes used in CPRD and with the International  
142 Classifications of Diseases-10<sup>th</sup> revision (ICD-10) codes in the HES database.

143 The study protocol was approved by the Independent Scientific Advisory Committee (ISAC) for  
144 the Medicines and Healthcare Products Regulatory Agency database research (ISAC protocol  
145 number 14\_222R). The study was conducted in accordance with all applicable regulatory

1  
2  
3 146 requirements, with the Guidelines for Good Pharmacoepidemiology Practices<sup>9</sup>, all applicable  
4  
5 147 patient privacy requirements and the guiding principles of the Declaration of Helsinki.  
6  
7

8  
9 148 The matched IC and IC-free cohorts were followed up from the index date until the earliest of the  
10  
11 149 following events: transfer out of the practice date, the last GP practice collections date, death date  
12  
13 150 or the end of the study<sup>7</sup>. Healthcare resource data associated with an incident HZ episode during  
14  
15 151 the study follow-up were extracted for IC and matched IC-free CPRD-HES-linked individuals.  
16  
17 152 Only reported records (resource utilization) with available event dates during the individuals'  
18  
19 153 eligibility period and those that occurred 7 days before the initial HZ onset date, up to 365 days  
20  
21 154 after the initial HZ onset date, were extracted. Consequently, individuals who recorded the first  
22  
23 155 PHN event date after 365 days post HZ event date were classified as not having PHN.  
24  
25  
26  
27

## 28 156 **Patient and Public Involvement**

29  
30  
31 157 This is a retrospective database analysis carried out following ethical committee approval. No  
32  
33 158 patient or the public was involved in the study design or in the recruitment or the conduct of this  
34  
35 159 study. No specific dissemination of study results to participants was done. However, we provided  
36  
37 160 a lay language summary contextualizing the results and potential clinical research relevance and  
38  
39 161 impact in Figure 1.  
40  
41  
42  
43

## 44 162 **Data sources**

45  
46 163 Data were extracted from the following sources: (1) CPRD GOLD 2014Q3: Consultation, Clinical,  
47  
48 164 Therapy and Referral datasets; (2) HES Inpatient 2013Q3: HES\_DIAGNOSIS\_EPI dataset; (3)  
49  
50 165 HES Outpatient data (Set 9): Appointment and clinical datasets. Healthcare resource utilization  
51  
52 166 was defined as: HZ-treatment related prescribed medications; Consultations and care provided by  
53  
54  
55  
56  
57  
58  
59  
60

1  
2  
3 167 General Practitioners (GPs) or others in the GP practice); HES secondary care outpatient visits  
4  
5 168 (HES outpatient events); and HES inpatient hospitalizations (HES inpatient events).  
6  
7

8  
9 169 For each patient, healthcare costs stratified by subcategory of interest (HES Inpatient  
10  
11 170 Hospitalizations; HES Outpatient consultations/visits; CPRD Ambulatory Visits; CPRD Other  
12  
13 171 Ambulatory Visits; CPRD Prescriptions) were computed by multiplying units of resource use by  
14  
15 172 their unit costs. These were then summed over all resource use categories to obtain a total cost for  
16  
17 173 each patient. Values were expressed in 2014 UK pound sterling (£).  
18  
19

#### 20 21 174 **Healthcare resource costs** 22

23  
24 175 For each patient, the cost of each prescription was calculated by merging the product code, package  
25  
26 176 type and prescribed quantity with the associated standard package size and unit cost. The unit cost  
27  
28 177 of a product in a prescription instance (i.e. one distinct record in the CPRD therapy) was calculated  
29  
30 178 using the cost described in the British National Formulary (BNF), 2015 (as listed price if included  
31  
32 179 or indicative price based on price in BNF).  
33  
34  
35

36  
37 180 Ambulatory visits included consultations with GPs and nurses in primary or community care. Visits  
38  
39 181 included consultations at the practice or at the home of the patient, during working hours and out  
40  
41 182 of hours. Consultations for which no clinical intervention was recorded were not included in the  
42  
43 183 cost estimate for GP practice related healthcare utilization, for example: information technology  
44  
45 184 data migration, administrative recording of received information. Administrative resource use in  
46  
47 185 primary care was considered, including time on the phone, writing reports, referrals, etc. A referral  
48  
49 186 to secondary care noted in a patient's record, *per se*, was not allocated the cost of the secondary  
50  
51 187 care appointment. The most conservative option for the cost per unit as included in the Personal  
52  
53 188 Social Services Research Unit (PSSRU) Costs of Health and Social Care, 2014 were applied e.g.  
54  
55  
56  
57  
58  
59  
60

1  
2  
3 189 GP consultation costs excluded qualification, direct staff care and travel costs<sup>10</sup>. Where specific  
4  
5 190 costs for 2013/14 were not available, 2012/13 costs, were adjusted by applying the Hospital and  
6  
7 191 Community Health Services inflation index<sup>10</sup>. Administration costs were based on unit costs as  
8  
9  
10 192 stated in the PSSRU, 2014.  
11  
12

13 193 Inpatient hospitalizations related to HZ were derived from HES data. Hospital Outpatient resource  
14  
15 194 utilization concerned HZ related referrals for non-inpatient hospital consultations, derived from the  
16  
17 195 HES Outpatient data. Additionally, visits to the Accident and Emergency (A&E) department in  
18  
19 196 hospitals were also recorded and costed. Inpatient hospitalization costs were based on the average  
20  
21 197 cost per episode using HES data for 2013/14 (calculated from the total average payment by result  
22  
23 198 spell cost and the average number of episodes per spell). Hospital outpatient costs were sourced  
24  
25 199 from National Tariff costs (2014) for specific consultant led outpatient consultations; conservative  
26  
27 200 costs were allocated i.e. wherever applicable costs for first attendance by a single professional  
28  
29 201 appointment were used<sup>11</sup>. Costs allocated to A&E visits were based on the cost of a category 3  
30  
31 202 investigation with category 1-3 treatment<sup>11</sup>. Only events related to HZ were costed out. Resources  
32  
33 203 related to HZ complications were considered using ICD-10 Code B020.  
34  
35  
36  
37  
38

39 204 No costs were assigned to Referrals, Sick leave or Nursing home care/admission entries in CPRD.  
40  
41 205 Further details, including information on the IC populations included, ICD-10 codes for HZ and  
42  
43 206 PHN, and unit healthcare costs are provided in the Supplementary Material, specifically in  
44  
45 207 Supplementary Tables 1 to 4.  
46  
47  
48  
49

## 50 208 **RESULTS**

51  
52 209 The CPRD-HES-linked matched IC and IC-free population cohorts (n=621,588 each) included  
53  
54 210 approximately 44% males and 56% females with a mean age of approximately 56 years. The age  
55  
56  
57  
58  
59  
60

1  
2  
3 211 distribution of matched cohorts was: 18-44 YOA (28.8%), 45-49 YOA (7.1%), 50-59 YOA  
4  
5 212 (17.2%), 60-64 YOA (9.9%), 65-69 YOA (9.4%), 70-79 YOA (16.6%), and  $\geq 80$  YOA (11.01%).  
6  
7

8  
9 213 The proportion of inpatient hospital admissions by age group for the CPRD-HES-linked matched  
10  
11 214 IC and IC-free cohorts over the time periods of 7 days prior to 90 days post initial HZ onset (Panel  
12  
13 215 A) or 7 days prior to 365 days post initial HZ onset (Panel B) are presented in Figure 2. Hospital  
14  
15 216 admissions over the longer follow-up period of 7 days prior to 365 days post initial HZ onset (Panel  
16  
17 217 B) were similar to those of the shorter follow-up period (Panel A) over all age groups. The  
18  
19 218 percentage of HZ cases hospitalized were higher in IC individuals (e.g. in Panel B 2.7% *versus*  
20  
21 219 0.4% in IC and IC-free individuals aged 18-49 YOA, respectively and 9.5% *versus* 7.5% in IC and  
22  
23 220 IC-free individuals aged  $\geq 80$  YOA, respectively). Multiple HZ-related hospital visits were reported  
24  
25 221 for some individuals. As such, Table 1 presents the mean number of healthcare resources utilized  
26  
27 222 by IC Status, Age Group and Analysis period. The mean number of hospitalizations per HZ case  
28  
29 223 for the 365-day analysis was, 0.035 and 0.005 in IC and IC-free individuals aged 18-49 YOA,  
30  
31 224 respectively and 0.173 and 0.115 in IC and IC-free individuals aged  $\geq 80$  YOA, respectively. A  
32  
33 225 similar pattern of higher healthcare resource utilization with increasing age and in IC individuals  
34  
35 226 was observed for all resources for which costs were assigned. A similar mean number of sick leave  
36  
37 227 certificates were observed between the IC and the IC-free cohorts with the mean decreasing with  
38  
39 228 age. Nursing home care / admissions were only recorded for individuals aged  $\geq 70$  YOA in CPRD.  
40  
41  
42  
43  
44  
45

46 229 Figure 3 and Table 2 present the overall healthcare costs by CPRD-HES-linked matched IC cohort  
47  
48 230 and age group for the analysis period 7 days prior to 365 days post initial HZ onset. The costs  
49  
50 231 increase with age and are consistently higher in the IC cohort compared with the IC-free cohort.  
51  
52 232 Although the absolute cost difference between IC and IC-free individuals increases with age from  
53  
54 233 £85.5 in individuals aged 18-49 YOA to £156.1 in individuals aged  $\geq 80$  YOA the relative  
55  
56  
57  
58  
59  
60

1  
2  
3 234 difference is higher in younger individuals (i.e. 75.8%-99.2% in <70 YOA) compared with older  
4  
5 235 individuals (i.e. 38.9%-57.6% in  $\geq 70$  YOA). It is also noteworthy that the means are consistently  
6  
7 236 higher than medians, and as is common for healthcare cost data, the distribution is skewed to the  
8  
9  
10 237 right. Supplementary Table 5 and Supplementary Figures 1 and 2 provide additional data on  
11  
12 238 healthcare Costs for the analysis period 7 days prior to 90 days post initial HZ onset.  
13  
14

15 239 Figure 4 presents the overall healthcare costs by each IC condition in the CPRD-HES-linked  
16  
17 240 matched IC and IC-free cohort by age group for the analysis period 7 days prior to 365 days post  
18  
19 241 initial HZ onset. For all IC conditions, the costs were higher than those for the IC-free group, in  
20  
21 242 particular for the hematopoietic stem cell transplantation (HSCT), hematological malignancies  
22  
23 243 (HM) and solid organ transplantations (SOT) conditions. In general, there was a similar trend of  
24  
25 244 increasing costs with increasing age-groups. A few outliers were observed due to small sample  
26  
27 245 sizes. For example, only 3 and 8 individuals aged  $\geq 70$  YOA were included in the HIV and HSCT  
28  
29 246 groups, respectively. Similarly, in total only 207 and 271 individuals with autoimmune thyroiditis  
30  
31 247 (AT) and SOT were included, respectively.  
32  
33  
34  
35  
36

37 248 Table 3 presents the mean healthcare costs by IC status and HZ complication status. The mean  
38  
39 249 healthcare costs were approximately 4 to 5 times higher for individuals with PHN for the analysis  
40  
41 250 period 7 days prior to 365 days compared to individuals with HZ only. Similarly, mean healthcare  
42  
43 251 costs were approximately 2 to 4 times higher for individuals with HZ complications compared to  
44  
45 252 individuals with HZ only.  
46  
47  
48  
49

50 253 Supplementary Table 6 presents the non-HZ related hospital inpatient stay for the period 7 days to  
51  
52 254 365 days post initial-HZ onset. The mean number of non-HZ related hospitalizations were  
53  
54 255 consistently higher in IC patients compared to and IC-free patients and increased with age.  
55  
56  
57  
58  
59  
60

1  
2  
3 256  
4  
56 257 **DISCUSSION**

8 258 In this study, we presented the healthcare resource utilization and costs associated with HZ in both  
9  
10 259 IC and IC-free populations using large electronic health record databases in the UK. An important  
11  
12 260 feature of this study was that the design enabled the calculation of IC condition prevalence rates,  
13  
14 261 HZ incidence rates and occurrence of HZ-related healthcare utilization and costs at individual level  
15  
16 262 in the same pre-defined population(s), see Yanni et. al. for further detail on epidemiological  
17  
18 263 outcomes<sup>7</sup>. In this study, every effort was made to include only resources directly related to HZ.  
19  
20 264 For example, only hospitalized patients were included who had an ICD-10 HZ diagnosis identified  
21  
22 265 in the HES database. Similarly, only medications potentially related to HZ treatment were included  
23  
24 266 (see Supplementary Material Tables 2 and 4). HZ-related mean treatment costs per patient were  
25  
26 267 higher in IC individuals (£189 *versus* £104 in IC and IC-free individuals aged 18-49 YOA,  
27  
28 268 respectively increasing to £557 *versus* £401 in IC and IC-free individuals aged  $\geq 80$  YOA,  
29  
30 269 respectively).

31  
32  
33  
34  
35  
36  
37 270 Previous studies of healthcare costs of HZ in the UK, included a small study, which estimated the  
38  
39 271 mean healthcare costs per HZ patient, from a National Health Services perspective, of £85.6 and  
40  
41 272 £400.9 in individuals aged  $< 65$  YOA and  $\geq 65$  YOA, respectively<sup>12</sup>. A later UK study that used the  
42  
43 273 HES and the health improvement network databases, estimated the mean cost of treating a HZ  
44  
45 274 patient to be £65.5 in the first month of diagnosis, with patients aged  $\geq 70$  YOA having a mean cost  
46  
47 275 of £83 in the first month and £15.80 in months 2 and 3<sup>13</sup>. The costs of treating individuals with  
48  
49 276 PHN were much higher, i.e. mean cost per patient was estimated to be £921 in all individuals and  
50  
51 277 £909.60 in individuals aged  $\geq 70$  YOA<sup>13</sup>. Another study evaluated mean healthcare costs (excluding  
52  
53 278 hospitalization costs) to be £75.63 per HZ patient with mean direct costs for treating PHN episodes  
54  
55  
56  
57  
58  
59  
60



1  
2  
3 279 (PHN pain occurring or persisting for 3 months) of £340.04<sup>14</sup>. These values augmented with  
4  
5 280 hospitalization costs were used as inputs in a cost-effectiveness model evaluating a HZ vaccine  
6  
7  
8 281 using the population of England and Wales<sup>3</sup>. The costs estimated by van Hoek et al. are consistent  
9  
10 282 with the values estimated in our study for IC-free individuals by age group<sup>3</sup>.

11  
12  
13 283 In a previous study, mean prescription costs per HZ patient were reported to be £40.52<sup>14</sup>. In our  
14  
15 284 study, the mean prescription costs per HZ patient ranged from £19.7 to £40.8 depending on the age  
16  
17 285 group, IC status and analysis period included. Our study aimed to include only medications  
18  
19 286 considered to be directly related to HZ; i.e. excluded medications that may be linked to IC  
20  
21 287 conditions (e.g. aspirin, analgesic creams as they could be used primarily to reduce pain from other  
22  
23 288 conditions). This restriction and the introduction of generic versions of medications such as  
24  
25 289 acyclovir, gabapentin (and derivatives of gabapentin) which resulted in lower prices, contributed  
26  
27 290 to the reduced overall medication costs reported in this study.  
28  
29  
30  
31

32  
33 291 Many studies on HCRU and costs include a number of days prior to diagnosis, e.g. 14 or 21 days,  
34  
35 292 as there may be a delay in diagnosis and HCRU may be utilized prior to diagnosis<sup>6,15</sup>. In this  
36  
37 293 analysis, costs of HZ only cases were assessed during the period 7 days prior to 30 days post HZ  
38  
39 294 onset, although it is recognized that HZ episodes can last for longer. The costs of PHN were  
40  
41 295 analyzed over 2 time-periods, i.e. (1) 7 days prior to 90 days post HZ onset and (2) 7 days prior to  
42  
43 296 365 days post HZ onset. The rationale for the time periods studied was that using analysis period  
44  
45 297 1 alone could lead to an underestimation of PHN costs whereas using analysis period 2 only could  
46  
47 298 overestimate these costs. The most frequently used definition of PHN is: pain persisting or  
48  
49 299 appearing at least 90 days following rash onset. The median duration of PHN has been reported to  
50  
51 300 be 10.3 and 12.9 months in individuals aged  $\leq 69$  and  $\geq 70$  YOA respectively<sup>16</sup>, and is likely to be  
52  
53 301 longer in individuals who are immunocompromised<sup>5</sup>.  
54  
55  
56  
57  
58  
59  
60

1  
2  
3 302 The healthcare costs associated with PHN and complications were higher than those for individuals  
4  
5 303 with HZ only. However, as reported elsewhere, when considering the overall cost of disease at a  
6  
7 304 population level, the overall healthcare-associated cost is higher for HZ only<sup>17</sup>. This is primarily a  
8  
9 305 result of the higher incidence rates of HZ only.

10  
11  
12  
13 306 Few studies have investigated healthcare resource utilization and costs in IC individuals. Schroder  
14  
15 307 et al. carried out a study using the German Pharmacoepidemiological Research Database, which  
16  
17 308 consists of claims data from four statutory health insurances<sup>18</sup>. They reported that during the quarter  
18  
19 309 of the HZ diagnosis or during the two following quarters, 10% of all HZ patients with an IC  
20  
21 310 condition were hospitalized (with a HZ diagnosis), whereas among IC-free HZ patients, 4.2% were  
22  
23 311 hospitalized. White et al. reported that in their study using the US Market Scan Research Database,  
24  
25 312 direct medical costs were nearly twice as high in IC patients compared with IC-free patients<sup>19</sup>. Li  
26  
27 313 et al. carried out a study using the US Truven Health MarketScan Commercial and Medicare  
28  
29 314 Supplemental Insurance databases<sup>15</sup>. They concluded that patients with the studied IC conditions  
30  
31 315 (i.e. HIV, SOT, bone marrow or stem cell transplant, and cancer) had significantly higher  
32  
33 316 healthcare utilization and cost when developing HZ than their comparable matches without HZ.  
34  
35 317 Insurance databases include not only the healthcare resource utilization but also costs. In the CPRD  
36  
37 318 and HES Databases only the resource utilization is captured. As such the overall costs need to be  
38  
39 319 calculated by assigning unit costs to the resource utilization. There are advantages however of using  
40  
41 320 the CPRD and HES in that the databases offer more diversity than might be observed using  
42  
43 321 insurance databases, the latter of which may be somewhat limited by bias associated with factors  
44  
45 322 such as age, race, and income. A strength of the CPRD database is that it is considered to be broadly  
46  
47 323 representative of the characteristics of patients and GP practices in the UK<sup>20,21</sup>.

1  
2  
3 324 This study has several limitations. Diagnoses were derived from administrative codes, which are  
4  
5 325 recognized to be subject to miscoding or under-coding and are not validated against medical  
6  
7 326 charts<sup>22</sup>. Increasing healthcare resource utilization and cost is likely to be related to increased  
8  
9  
10 327 severity of IC conditions. In a study, Schroder et al. categorized individuals as low IC and high  
11  
12 328 IC<sup>18</sup>. However, insufficient details are recorded in the CPRD and HES databases to allow adequate  
13  
14 329 definition of patients' severity of immunosuppression e.g. laboratory parameters,  
15  
16 330 immunosuppressive medication details such as chemotherapy. In addition, many IC individuals  
17  
18  
19 331 had prescriptions that included more than one immunosuppressing medicine. In this study we  
20  
21 332 selected 16 IC conditions in our definition of an IC population but perhaps other researchers would  
22  
23  
24 333 select different IC conditions. As such our study is exploratory in nature and was not intended to  
25  
26 334 be definitive.

27  
28  
29 335  
30  
31 336 **CONCLUSION**  
32  
33 337 Immunosuppression is known to be associated with an increased risk of HZ in the UK<sup>2,7</sup>. In this  
34  
35 338 descriptive analysis, involving a large representative national data source, the results suggest that  
36  
37 339 individuals with IC conditions were associated with higher HZ related healthcare utilization and  
38  
39  
40 340 costs than IC-free individuals<sup>6,7,15</sup>. The results from this study could be used in economic analyses  
41  
42 341 to evaluate the value of vaccination in reducing the burden of HZ in these populations.  
43  
44  
45

46 342  
47  
48  
49  
50  
51  
52  
53  
54  
55  
56  
57  
58  
59  
60

## 343 **AUTHOR CONTRIBUTIONS**

344 VB, AEG, YEH, GF, MH and DC participated in the conception and design of the study. VB, AEG,  
345 YEH, GF and MH participated in the collection or generation of the study data. VB, AEG and YEH  
346 performed the study. AEG, YEH, MH and DC contributed to the material. VB, AEG, YEH, GF,  
347 MH and DC were involved in the analysis or interpretation of the data. All named authors provided  
348 substantial intellectual and scientific input during the manuscript development, critically reviewing  
349 the content, revising the manuscript and giving final approval before submission. The work  
350 described was carried out in accordance with the ICMJE recommendations for conducting,  
351 reporting, editing and publishing scholarly work in medical journals. All authors had full access to  
352 the data and gave final approval before submission.

## 353 **ACKNOWLEDGEMENTS**

354 The authors would like to thank Emmanuelle Espié, Yanni Emad, Morgane Guinnec, François  
355 Haguinet for their contribution to the study. They would also like to thank the Business & Decision  
356 Life Sciences platform for editorial assistance and coordination, on behalf of GSK. Gregory Collet  
357 coordinated manuscript development and editorial support. Kathleen Daly provided editing  
358 support. This study is based in part on data from the Clinical Practice Research Datalink obtained  
359 under licence from the UK Medicines and Healthcare products Regulatory Agency. However, the  
360 interpretation and conclusions contained in this report are those of the authors alone.

## 361 **CONFLICTS OF INTEREST**

362 VB, MH and DC are employees of the GSK group of companies. DC and MH hold shares in the  
363 GSK group of companies. AEG and YEH have nothing to disclose. GF was employed by the GSK  
364 group of companies between 2012 and Feb 2015, during which the study was designed and  
365 implemented. Later, as an employee of P-95 epidemiology and pharmacovigilance, GF provided

1  
2  
3 366 contracted consultancy services to the GSK group of companies for this and other GSK-sponsored  
4  
5 367 studies. P-95 provides contracted services to the GSK group of companies, beyond the scope of  
6  
7  
8 368 this study.  
9

## 10 11 369 **DATA SHARING STATEMENT**

12  
13 370 All data used in this study are presented in the manuscript, references to the original material are  
14  
15 371 provided. Please contact the corresponding author shall you require any additional information  
16  
17

## 18 19 372 **ETHICAL APPROVAL**

20  
21 373 Approval was obtained from the Clinical Practice Research Datalink Independent Scientific  
22  
23 374 Advisory Committee (14\_222R).  
24  
25

## 26 27 375 **FUNDING**

28  
29 376 GlaxoSmithKline Biologicals SA was the funding source and was involved in all study (GSK study  
30  
31 377 identifier: e-track number: 201615) activities and overall data management (collection, analysis  
32  
33 378 and interpretation). GlaxoSmithKline Biologicals SA also funded all costs associated with the  
34  
35 379 development and the publishing of the present manuscript. All authors had full access to the data  
36  
37 380 and the corresponding author was responsible for submission of the publication.  
38  
39  
40  
41  
42  
43  
44  
45  
46  
47  
48  
49  
50  
51  
52  
53  
54  
55  
56  
57  
58  
59  
60

1  
2  
3 381 **REFERENCES**  
4

- 5 382 1. Oxman M. Zoster vaccine: current status and future prospects. *Clin Infect Dis* 2010;51(2):197-  
6  
7 383 213.  
8  
9  
10  
11 384 2. Forbes HJ, Bhaskaran K, Thomas SL, et al. Quantification of risk factors for herpes zoster:  
12  
13 385 population based case-control study. *BMJ* 2014;348:g2911.  
14  
15  
16 386 3. van Hoek AJ, Gay N, Melegaro A. Estimating the cost-effectiveness of vaccination against  
17  
18 387 herpes zoster in England and Wales. *Vaccine* 2009;27:1454-67.  
19  
20  
21  
22 388 4. Coplan PM, Schmader K, Nikas A, et al. Development of a measure of the burden of pain due  
23  
24 389 to herpes zoster and postherpetic neuralgia for prevention trials: adaptation of the brief pain  
25  
26 390 inventory. *J Pain* 2004;5(6):344-56.  
27  
28  
29  
30 391 5. Drolet M, Brisson M, Schmader K, et al. Predictors of postherpetic neuralgia among patients  
31  
32 392 with herpes zoster: a prospective study. *J Pain* 2010;11(11):1211-21.  
33  
34  
35  
36 393 6. Yawn BP, Itzler RF, Wollan PC, et al. Health care utilization and cost burden of herpes zoster  
37  
38 394 in a community population. *Mayo Clin Proc* 2009;84(9):787-94.  
39  
40  
41 395 7. Yanni E, Ferreira G, El Hahi Y, et al. The burden of herpes zoster in 16 selected  
42  
43 396 immunocompromised populations in England: a cohort study in the Clinical Practice Research  
44  
45 397 Datalink 2000-2012. *BMJ Open* 2018;8:e020528.  
46  
47  
48  
49 398 8. Brazauskas R and Logan BR, Observational Studies: Matching or Regression? *Biol Blood*  
50  
51 399 *Marrow Transplant* 2016;22(3):557-563.  
52  
53  
54  
55  
56  
57  
58  
59  
60

- 1  
2  
3 400 9. International Society for Pharmacoepidemiology. Guidelines for Good Pharmacoepidemiology  
4  
5 401 Practices (GPP). Secondary Guidelines for Good Pharmacoepidemiology Practices (GPP) 2015.  
6  
7 402 [https://www.pharmacoepi.org/resources/guidelines\\_08027.cfm](https://www.pharmacoepi.org/resources/guidelines_08027.cfm).  
8  
9  
10  
11 403 10. Curtis LPSSRU. Unit costs of Health & Social Care 2014. Secondary Unit costs of Health &  
12  
13 404 Social Care 2014 2014. <http://www.pssru.ac.uk/project-pages/unit-costs/2014/>.  
14  
15  
16 405 11. National Tariff Payment System. Annex 5A National Prices. Secondary Annex 5A National  
17  
18 406 Prices 2014/2015. [https://www.gov.uk/government/publications/national-tariff-payment-system-](https://www.gov.uk/government/publications/national-tariff-payment-system-2014-to-2015)  
19  
20 407 2014-to-2015.  
21  
22  
23  
24 408 12. Scott FT, Johnson RW, Leedham-Green M, et al. The burden of Herpes Zoster: a prospective  
25  
26 409 population based study. *Vaccine* 2006;24(9):1308-14.  
27  
28  
29  
30 410 13. Taieb V, Schwarzbard J, Butt T, et al. The Epidemiological and Cost Burden of Herpes  
31  
32 411 Zoster (Hz) and Post-Herpetic Neuralgia (Phn) in the UK. *Value Health* 2015;18(7):A589.  
33  
34  
35  
36 412 14. Gauthier A, Breuer J, Carrington D, et al. Epidemiology and cost of herpes zoster and post-  
37  
38 413 herpetic neuralgia in the United Kingdom. *Epidemiol Infect* 2009;137(1):38-47.  
39  
40  
41 414 15. Li A, Chen SY, Burstin SJ, et al. Cost of Herpes Zoster in Patients With Selected Immune-  
42  
43 415 Compromised Conditions in the United States. *Open Forum Infect Dis* 2016;3(2):ofw067.  
44  
45  
46  
47 416 16. Moore L, Remy V, Martin M, et al. A health economic model for evaluating a vaccine for the  
48  
49 417 prevention of herpes zoster and post-herpetic neuralgia in the UK. *Cost Eff Resour Alloc*  
50  
51 418 2010;8:7.  
52  
53  
54  
55  
56  
57  
58  
59  
60

- 1  
2  
3 419 17. Gater A, Uhart M, McCool R, et al. The humanistic, economic and societal burden of herpes  
4  
5 420 zoster in Europe: a critical review. *BMC Public Health* 2015;15:193.  
6  
7  
8 421 18. Schröder C, Enders D, Schink T, et al. Incidence of herpes zoster amongst adults varies by  
9  
10 422 severity of immunosuppression. *J Infect* 2017;S0163-4453(17):30228-1.  
11  
12  
13  
14 423 19. White RR, Lenhart G, Singhal PK, et al. Incremental 1-Year Medical Resource Utilization  
15  
16 424 and Costs for Patients with Herpes Zoster from a Set of US Health Plans. *Pharmacoeconomics*  
17  
18 425 2009;27(9):781-92.  
19  
20  
21  
22 426 20. Campbell J, Dedman DJ, Eaton SC, et al. Is the CPRD GOLD population comparable to the  
23  
24 427 U.K. population? *Pharmacoepidemiol Drug Saf* 2013;22:280.  
25  
26  
27  
28 428 21. Herrett E, Gallagher AM, Bhaskaran K, et al. Data Resource Profile: Clinical Practice  
29  
30 429 Research Datalink (CPRD). *Int J Epidemiol* 2015;44(3):827-36.  
31  
32  
33 430 22. Pierik JG, Gumbs PD, Fortanier SA, et al. Epidemiological characteristics and societal burden  
34  
35 431 of varicella zoster virus in the Netherlands. *BMC Infect Dis* 2012;12:110.  
36  
37  
38  
39  
40  
41  
42  
43  
44  
45  
46  
47  
48  
49  
50  
51  
52  
53  
54  
55  
56  
57  
58  
59  
60



432 **TABLES**433 **Table 1: Mean number of healthcare resources by IC status, age group and analysis period**

|                              | IC cohort |         | IC-Free cohort |         |
|------------------------------|-----------|---------|----------------|---------|
|                              | 90 Day    | 365 Day | 90 Day         | 365 Day |
| HES Hospital admission       |           |         |                |         |
| 18-49                        | 0.035     | 0.035   | 0.005          | 0.005   |
| 50-59                        | 0.042     | 0.046   | 0.006          | 0.007   |
| 60-64                        | 0.053     | 0.055   | 0.009          | 0.010   |
| 65-69                        | 0.049     | 0.050   | 0.014          | 0.014   |
| 70-79                        | 0.072     | 0.076   | 0.029          | 0.030   |
| ≥80                          | 0.163     | 0.173   | 0.108          | 0.115   |
| HES Outpatient consultation  |           |         |                |         |
| 18-49                        | 0.095     | 0.116   | 0.041          | 0.045   |
| 50-59                        | 0.086     | 0.122   | 0.062          | 0.086   |
| 60-64                        | 0.136     | 0.180   | 0.065          | 0.078   |
| 65-69                        | 0.146     | 0.217   | 0.085          | 0.108   |
| 70-79                        | 0.165     | 0.267   | 0.113          | 0.181   |
| ≥80                          | 0.173     | 0.313   | 0.149          | 0.231   |
| CPRD Ambulatory visits       |           |         |                |         |
| 18-49                        | 2.816     | 3.168   | 2.186          | 2.360   |
| 50-59                        | 3.334     | 4.175   | 2.466          | 2.907   |
| 60-64                        | 3.733     | 5.081   | 2.598          | 3.115   |
| 65-69                        | 4.089     | 6.009   | 2.774          | 3.610   |
| 70-79                        | 4.534     | 6.959   | 3.413          | 4.767   |
| ≥80                          | 4.881     | 7.422   | 3.811          | 5.367   |
| CPRD Other ambulatory visits |           |         |                |         |
| 18-49                        | 0.319     | 0.411   | 0.155          | 0.170   |
| 50-59                        | 0.433     | 0.623   | 0.218          | 0.277   |

|    |                                     |       |       |       |       |
|----|-------------------------------------|-------|-------|-------|-------|
| 1  |                                     |       |       |       |       |
| 2  |                                     |       |       |       |       |
| 3  | 60-64                               | 0.545 | 0.885 | 0.251 | 0.360 |
| 4  |                                     |       |       |       |       |
| 5  | 65-69                               | 0.607 | 1.064 | 0.330 | 0.454 |
| 6  |                                     |       |       |       |       |
| 7  | 70-79                               | 0.686 | 1.251 | 0.417 | 0.722 |
| 8  |                                     |       |       |       |       |
| 9  | ≥80                                 | 0.860 | 1.616 | 0.668 | 1.183 |
| 10 |                                     |       |       |       |       |
| 11 | CPRD Prescriptions (All treatments) |       |       |       |       |
| 12 | 18-49                               | 1.247 | 1.363 | 0.890 | 0.931 |
| 13 |                                     |       |       |       |       |
| 14 | 50-59                               | 1.670 | 1.994 | 1.143 | 1.227 |
| 15 |                                     |       |       |       |       |
| 16 | 60-64                               | 1.969 | 2.602 | 1.379 | 1.489 |
| 17 |                                     |       |       |       |       |
| 18 | 65-69                               | 2.129 | 2.894 | 1.473 | 1.717 |
| 19 |                                     |       |       |       |       |
| 20 | 70-79                               | 2.310 | 3.295 | 1.814 | 2.347 |
| 21 |                                     |       |       |       |       |
| 22 | ≥80                                 | 2.405 | 3.743 | 1.844 | 2.575 |
| 23 |                                     |       |       |       |       |
| 24 | CPRD Referrals*                     |       |       |       |       |
| 25 | 18-49                               | 0.018 | 0.020 | 0.011 | 0.012 |
| 26 |                                     |       |       |       |       |
| 27 | 50-59                               | 0.021 | 0.026 | 0.018 | 0.022 |
| 28 |                                     |       |       |       |       |
| 29 | 60-64                               | 0.031 | 0.040 | 0.020 | 0.024 |
| 30 |                                     |       |       |       |       |
| 31 | 65-69                               | 0.031 | 0.044 | 0.015 | 0.023 |
| 32 |                                     |       |       |       |       |
| 33 | 70-79                               | 0.033 | 0.054 | 0.031 | 0.047 |
| 34 |                                     |       |       |       |       |
| 35 | ≥80                                 | 0.040 | 0.065 | 0.029 | 0.048 |
| 36 |                                     |       |       |       |       |
| 37 | CPRD Sick leave*                    |       |       |       |       |
| 38 | 18-49                               | 0.162 | 0.175 | 0.155 | 0.161 |
| 39 |                                     |       |       |       |       |
| 40 | 50-59                               | 0.156 | 0.178 | 0.173 | 0.182 |
| 41 |                                     |       |       |       |       |
| 42 | 60-64                               | 0.060 | 0.069 | 0.080 | 0.087 |
| 43 |                                     |       |       |       |       |
| 44 | 65-69                               | 0.017 | 0.017 | 0.008 | 0.008 |
| 45 |                                     |       |       |       |       |
| 46 | 70-79                               | 0.001 | 0.001 | 0.002 | 0.003 |
| 47 |                                     |       |       |       |       |
| 48 | ≥80                                 | 0.000 | 0.000 | 0.000 | 0.000 |
| 49 |                                     |       |       |       |       |
| 50 | CPRD Nursing home care/admission*   |       |       |       |       |
| 51 | 18-69                               | 0.000 | 0.000 | 0.000 | 0.000 |
| 52 |                                     |       |       |       |       |
| 53 | 70-79                               | 0.001 | 0.001 | 0.001 | 0.001 |
| 54 |                                     |       |       |       |       |
| 55 |                                     |       |       |       |       |
| 56 |                                     |       |       |       |       |
| 57 |                                     |       |       |       |       |
| 58 |                                     |       |       |       |       |
| 59 |                                     |       |       |       |       |
| 60 |                                     |       |       |       |       |

1  
2  
3  
4  
5  
6  
7  
8  
9  
10  
11  
12  
13  
14  
15  
16  
17  
18  
19  
20  
21  
22  
23  
24  
25  
26  
27  
28  
29  
30  
31  
32  
33  
34  
35  
36  
37  
38  
39  
40  
41  
42  
43  
44  
45  
46  
47  
48  
49  
50  
51  
52  
53  
54  
55  
56  
57  
58  
59  
60

|     |       |       |       |       |
|-----|-------|-------|-------|-------|
| ≥80 | 0.004 | 0.004 | 0.003 | 0.003 |
|-----|-------|-------|-------|-------|

434  
435  
436  
437  
438  
439

---

\* No costs were assigned for CPRD Referrals, CPRD Sick leave, CPRD Nursing home care / admission  
Abbreviations: IC, immunocompromized; HES, Hospital Episode Statistics; CPRD, Clinical Practice Research Datalink;  
Costs were assigned for HES Hospital admission, HES Outpatient consultation, CPRD Ambulatory Visits, CPRD Other  
Ambulatory Visits, CPRD Prescriptions.

For peer review only

440 **Table 2: Mean cost (£) of healthcare resource utilization by IC status, age group and**  
 441 **analysis period\***

| Age groups (YOA) | Statistic  | Mean cost (£) |              |                |              |
|------------------|------------|---------------|--------------|----------------|--------------|
|                  |            | IC cohort     |              | IC-free cohort |              |
|                  |            | 90 Day        | 365 Day      | 90 Day         | 365 Day      |
| 18-49            | Mean       | 173.3         | 189.3        | 98.2           | 103.8        |
|                  | Median, SE | 86.1, 6.03    | 86.9, 6.81   | 59.6, 3.06     | 62.0, 3.35   |
| 50-59            | Mean       | 199.0         | 237.8        | 118.9          | 135.3        |
|                  | Median, SE | 106.6, 6.37   | 108.8, 9.05  | 74.6, 3.72     | 74.8, 4.68   |
| 60-64            | Mean       | 236.2         | 294.2        | 126.8          | 147.7        |
|                  | Median, SE | 120.2, 9.39   | 124.1, 12.01 | 78.9, 4.48     | 80.9, 5.81   |
| 65-69            | Mean       | 241.6         | 317.4        | 145.5          | 174.4        |
|                  | Median, SE | 132.2, 8.52   | 140.0, 11.25 | 87.9, 4.64     | 90.7, 5.97   |
| 70-79            | Mean       | 289.6         | 391.7        | 189.8          | 248.6        |
|                  | Median, SE | 154.2, 7.21   | 163.9, 10.11 | 108.8, 4.97    | 113.6, 6.88  |
| ≥80              | Mean       | 427.0         | 557.1        | 319.7          | 401.0        |
|                  | Median, SE | 176.2, 13.12  | 188.6, 17.05 | 143.0, 11.20   | 154.0, 13.63 |

442  
 443 \* post initial HZ onset

444 Abbreviations: £: 2014 UK pound sterling; HZ: herpes zoster; IC, immunocompromized; YOA: years of age, SE: Standard Error

445

446 **Table 3: Mean cost (£) of healthcare resource utilization by IC status, age group, analysis**  
 447 **period and HZ complication status**

| Age groups<br>(YOA) |            | Mean cost (£), IC      |                         |                          |                      |
|---------------------|------------|------------------------|-------------------------|--------------------------|----------------------|
|                     |            | HZ only*               | PHN Day 90 <sup>#</sup> | PHN Day 365 <sup>†</sup> | HZ-Comp <sup>§</sup> |
| 18-49               | Mean       | 156.6                  | 302.4                   | 746.6                    | 573.3                |
|                     | Median, SE | 81.8, 5.60             | 194.7, 33.83            | 465.7, 77.58             | 176.5, 87.70         |
| 50-59               | Mean       | 168.1                  | 468.0                   | 998.9                    | 562.6                |
|                     | Median, SE | 93.9, 5.05             | 262.8, 49.39            | 588.8, 89.42             | 226.0, 89.23         |
| 60-64               | Mean       | 190.8                  | 538.7                   | 1135.5                   | 780.5                |
|                     | Median, SE | 108.8, 7.59            | 297.7, 51.60            | 688.2, 76.50             | 226.4, 175.40        |
| 65-69               | Mean       | 195.6                  | 489.3                   | 1064.3                   | 551.8                |
|                     | Median, SE | 109.6, 8.04            | 305.4, 31.80            | 738.9, 50.39             | 204.9, 104.01        |
| 70-79               | Mean       | 228.9                  | 540.4                   | 1200.2                   | 847.5                |
|                     | Median, SE | 129.0, 6.18            | 324.5, 27.02            | 808.4, 44.67             | 337.4, 111.20        |
| ≥80                 | Mean       | 307.6                  | 779.5                   | 1536.0                   | 1396.4               |
|                     | Median, SE | 148.6, 11.11           | 384.3, 40.82            | 937.3, 64.54             | 516.5, 151.71        |
|                     |            | Mean cost (£), IC-free |                         |                          |                      |
|                     |            | HZ only*               | PHN Day 90 <sup>#</sup> | PHN Day 365 <sup>†</sup> | HZ-Comp <sup>§</sup> |
| 18-49               | Mean       | 91.6                   | 216.1                   | 391.9                    | 246.4                |
|                     | Median, SE | 54.9, 2.67             | 137.7, 39.25            | 261.9, 48.41             | 106.6, 58.73         |
| 50-59               | Mean       | 106.8                  | 262.8                   | 540.8                    | 275.1                |
|                     | Median, SE | 72.0, 2.76             | 208.2, 25.72            | 391.3, 45.62             | 118.1, 124.73        |
| 60-64               | Mean       | 114.1                  | 270.5                   | 556.1                    | 192.7                |
|                     | Median, SE | 74.6, 4.34             | 191.9, 23.69            | 409.4, 46.78             | 78.1, 56.06          |
| 65-69               | Mean       | 123.7                  | 287.7                   | 595.5                    | 592.6                |
|                     | Median, SE | 80.9, 3.45             | 202.4, 22.35            | 440.2, 37.43             | 229.5, 179.85        |

|       |            |             |              |               |               |
|-------|------------|-------------|--------------|---------------|---------------|
| 70-79 | Mean       | 149.2       | 388.2        | 813.7         | 511.5         |
|       | Median, SE | 88.7, 3.93  | 248.6, 21.27 | 546.1, 34.81  | 232.9, 89.19  |
| ≥80   | Mean       | 242.0       | 607.4        | 1182.8        | 1046.5        |
|       | Median, SE | 121.3, 9.08 | 310.5, 41.96 | 726.9, 158.46 | 341.0, 149.46 |

448

449 \* Individuals with HZ only (i.e. without PHN and complications): includes only costs 7 days prior to 30 days post initial HZ onset

450 # Individuals with HZ and PHN: includes only costs 7 days prior to 90 days post initial HZ onset

451 <sup>†</sup> Individuals with HZ and PHN: includes costs 7 days prior to 365 days post initial HZ onset452 <sup>§</sup> Individuals with HZ and complications but no PHN: includes only costs 7 days prior to 30 days post initial HZ onset

453 Abbreviations: £: 2014 UK pound sterling; IC, immunocompromized; HZ, herpes zoster; PHN, post-herpetic neuralgia; HZ-

454 Comp: HZ and complications with no PHN; SE: Standard Errors; YOA: years of age

455

1  
2  
3  
4  
5  
6  
7  
8  
9  
10  
11  
12  
13  
14  
15  
16  
17  
18  
19  
20  
21  
22  
23  
24  
25  
26  
27  
28  
29  
30  
31  
32  
33  
34  
35  
36  
37  
38  
39  
40  
41  
42  
43  
44  
45  
46  
47  
48  
49  
50  
51  
52  
53  
54  
55  
56  
57  
58  
59  
60

456 **FIGURE**

457 **Figure 1: Lay Language Summary**

For peer review only

1  
2  
3 458 **Figure 2: Inpatient Hospital Admission by HES-linked matched IC or IC-free cohort over**  
4  
5 459 **the time periods: 7 days prior to 90 days post initial HZ onset (Panel A) and 7 days prior to**  
6  
7 460 **365 days post initial HZ onset (Panel B)**  
8  
9

10 461  
11  
12  
13 462 For HZ individuals without PHN: data from 7 days prior to 30 days post HZ onset included.  
14 463 For HZ individuals with PHN: data from 7 days prior until the following time periods after HZ onset included - 90 days (Panel A)  
15 464 and 365 days (Panel B).  
16 465 Abbreviations: HES, Hospital Episode Statistics; HZ, herpes zoster; IC, immunocompromised; PHN, post-herpetic neuralgia  
17  
18  
19 466  
20  
21  
22  
23  
24  
25  
26  
27  
28  
29  
30  
31  
32  
33  
34  
35  
36  
37  
38  
39  
40  
41  
42  
43  
44  
45  
46  
47  
48  
49  
50  
51  
52  
53  
54  
55  
56  
57  
58  
59  
60



1  
2  
3 467 **Figure 3 : Healthcare Costs for by HES-linked matched IC (Panel A) and IC-free cohort**  
4  
5 468 **(Panel B) for the analysis period 7 days prior to 365 days post initial HZ onset**  
6  
7

8 469  
9  
10  
11 470 For HZ individuals without PHN: data from 7 days prior to 30 days post HZ onset included.  
12  
13 471 For HZ individuals with PHN: data from 7 days prior until 365 days after HZ onset.  
14 472 Abbreviations: £, 2014 UK pound sterling; CPRD, Clinical Practice Research Datalink; CPRD-Pre, CPRD Prescriptions; CPRD-  
15 473 OA, CPRD Other Ambulatory Visits; CPRD-Amb, CPRD Ambulatory Visits; HES, Hospital Episode Statistics; HES-Out, HES  
16 474 Outpatient consultation; HES-Hosp, HES Hospital admission; IC, immunocompromised; HZ, herpes zoster; PHN, post-herpetic  
17 475 neuralgia.  
18  
19 476  
20  
21  
22  
23  
24  
25  
26  
27  
28  
29  
30  
31  
32  
33  
34  
35  
36  
37  
38  
39  
40  
41  
42  
43  
44  
45  
46  
47  
48  
49  
50  
51  
52  
53  
54  
55  
56  
57  
58  
59  
60

1  
2  
3 477 **Figure 4 : Healthcare Costs for each IC condition in the HES-linked matched IC and IC-**  
4  
5 478 **free cohort by age group for the analysis period 7 days prior to 365 days post initial HZ**  
6  
7  
8 479 **onset**  
9

10 480  
11  
12  
13 481 For HZ individuals without PHN: data from 7 days prior to 30 days post HZ onset included.  
14 482 For HZ individuals with PHN: data from 7 days prior until 365 days after HZ onset.  
15 483 Abbreviations: £, 2014 UK pound sterling; AID, autoimmune diseases; AT, autoimmune thyroiditis; CORTDS, corticosteroid  
16 484 exposure; ESRD, end-stage renal disease; HES, Hospital Episode Statistics; HIV, human immunodeficiency virus; HM,  
17 485 hematological malignancies; HSCT, hematopoietic stem cell transplantation; HZ, herpes zoster; IBD, inflammatory bowel  
18 486 syndrome; IC, immunocompromised; MS, multiple sclerosis; PHN, post-herpetic neuralgia; RA, rheumatoid arthritis; SLE,  
19 487 systemic lupus erythematosus; SOM, solid organ malignancies; SOT, solid organ transplantations; PSOR, psoriasis; OID, other  
20 488 immunodeficiency; OIT, other immunosuppressive therapy; PR, polymyalgia rheumatica.  
21  
22  
23  
24 489

1  
2  
3  
4  
5  
6  
7  
8  
9  
10  
11  
12  
13  
14  
15  
16  
17  
18  
19  
20  
21  
22  
23  
24  
25  
26  
27  
28  
29  
30  
31  
32  
33  
34  
35  
36  
37  
38  
39  
40  
41  
42  
43  
44  
45  
46  
47  
48  
49  
50  
51  
52  
53  
54  
55  
56  
57  
58  
59  
60

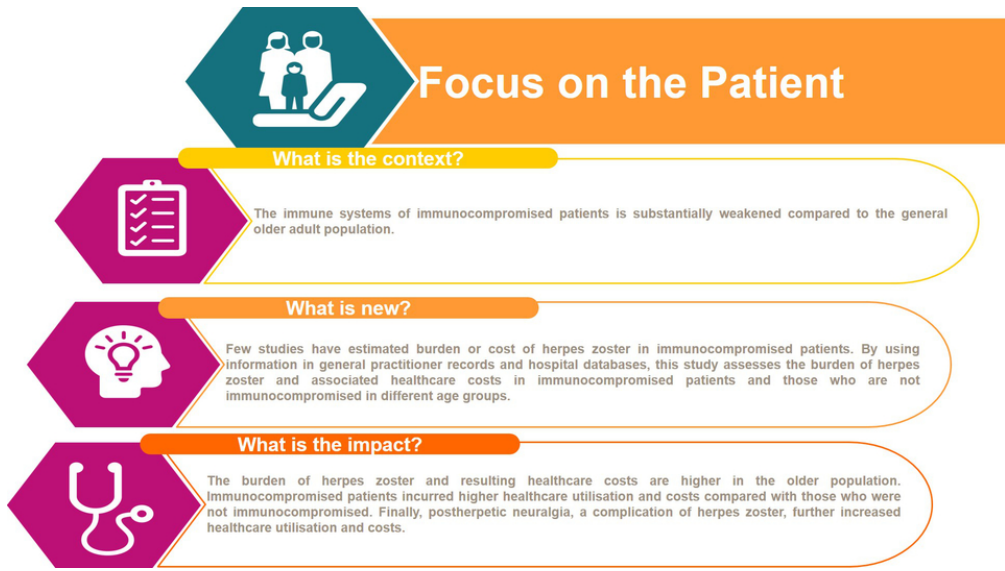

Figure 1: Lay Language Summary

81x45mm (300 x 300 DPI)

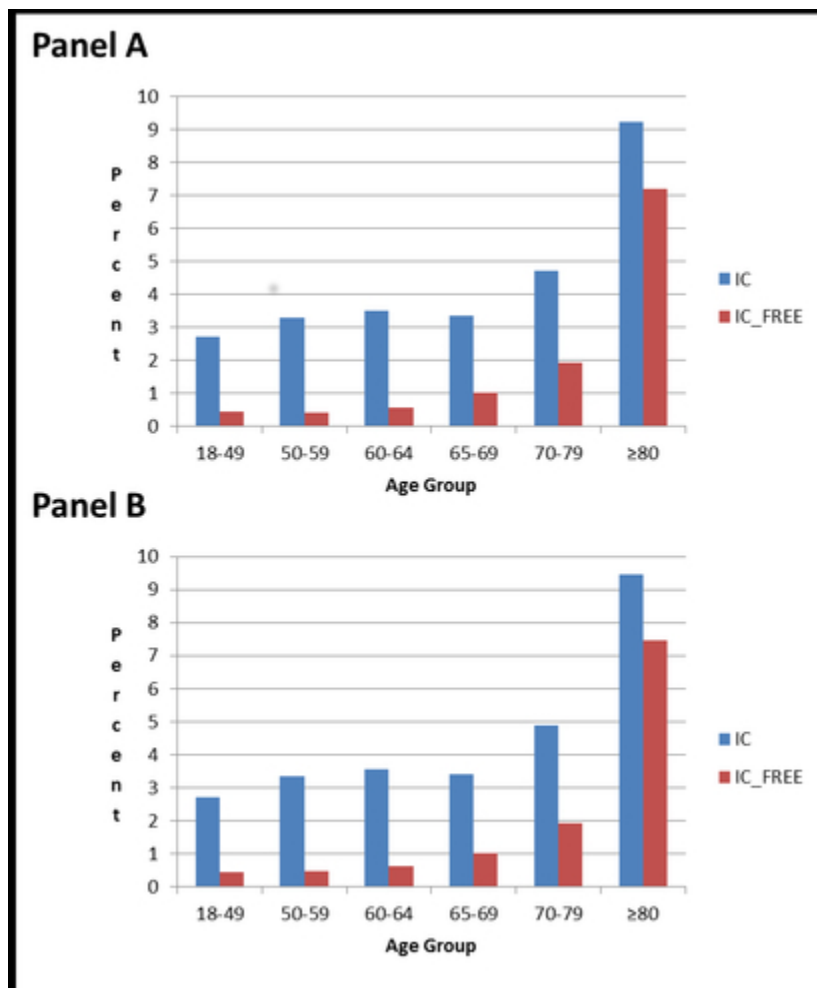

Figure 2: Inpatient Hospital Admission by HES-linked matched IC or IC-free cohort over the time periods: 7 days prior to 90 days post initial HZ onset (Panel A) and 7 days prior to 365 days post initial HZ onset (Panel B)

34x41mm (300 x 300 DPI)

1  
2  
3  
4  
5  
6  
7  
8  
9  
10  
11  
12  
13  
14  
15  
16  
17  
18  
19  
20  
21  
22  
23  
24  
25  
26  
27  
28  
29  
30  
31  
32  
33  
34  
35  
36  
37  
38  
39  
40  
41  
42  
43  
44  
45  
46  
47  
48  
49  
50  
51  
52  
53  
54  
55  
56  
57  
58  
59  
60

**Panel A**

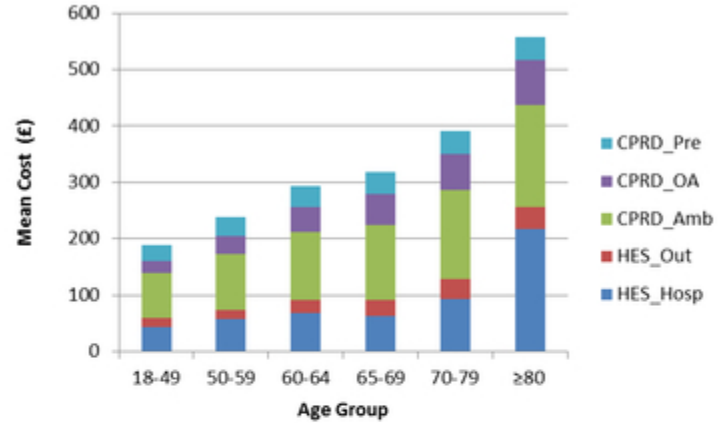

**Panel B**



Figure 3 : Healthcare Costs for by HES-linked matched IC (Panel A) and IC-free cohort (Panel B) for the analysis period 7 days prior to 365 days post initial HZ onset

34x45mm (300 x 300 DPI)

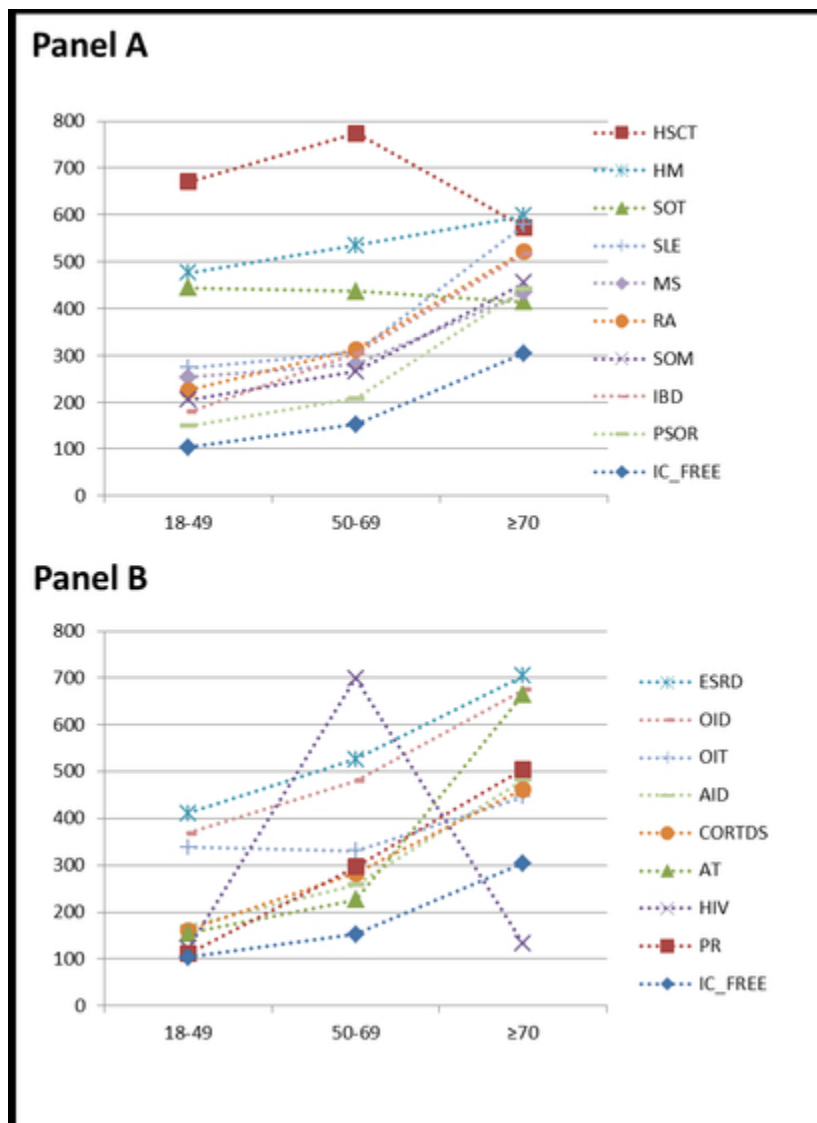

Figure 4 : Healthcare Costs for each IC condition in the HES-linked matched IC and IC-free cohort by age group for the analysis period 7 days prior to 365 days post initial HZ onset

34x47mm (300 x 300 DPI)

## Supplementary Material

# HERPES ZOSTER RELATED HEALTHCARE BURDEN AND COSTS IN IMMUNOCOMPROMISED (IC) AND IC-FREE POPULATIONS IN ENGLAND: AN OBSERVATIONAL RETROSPECTIVE DATABASE ANALYSIS

Desmond Curran, Manjit Hunjan, Amale El Ghachi, Yassine El Hahi,  
Veronique Bianco, Germano Ferreira

BMJ Open

### **Immunocompromised population**

The immunocompromised (IC) population, referred to as the IC cohort hereafter, included eligible subjects reporting at least one of the following conditions or therapies at any time before 31<sup>st</sup> March 2012:

- Hematopoietic stem cell transplant (HSCT);
- Solid organ transplantation (SOT);
- Solid organ malignancies (SOM);
- Hematological malignancies (HM): Leukemia, Lymphoma, Myeloma;
- Autoimmune diseases (AID):
  - Rheumatoid Arthritis (RA);
  - Systemic *Lupus erythematosus* (SLE);
  - Inflammatory Bowel Disease (IBD);
  - Psoriasis (PSOR);
  - Multiple sclerosis (MS);
  - Polymyalgia rheumatica (PR) and;
  - Autoimmune thyroiditis (AT).
- Human immunodeficiency virus (HIV);
- End-stage renal disease (ESRD);
- Corticosteroid exposure (CORTDS);
- Other immunosuppressive therapy (OIT) exposure;
- Other immunodeficiency (OID) conditions.

For autoimmune diseases, each disease was considered as a separate IC condition. Any subject with a code for any IC condition listed above at any time in their record was excluded from the IC-free cohort. Only subjects that were part of IC conditions based on treatment administration (“Corticosteroid exposure” and/or the “Other immunosuppressive therapy exposure” IC conditions) had an end of follow-up based on prescriptions and could present a gap of exposure in the IC cohort between the end of exposure in that IC condition and the beginning of the next one, if any, during which they could not be considered as IC.



### **IC Matching**

The IC-free matched population included a random sample of the IC-free population described above matched to the subjects of the IC population with a ratio of 1:1 (IC: IC-free subjects) when possible. The matching factors were:

- Hospital Episode Statistics (HES) linkage eligibility;
- The year of birth of the subject;
- The gender of the subject, and;
- The practice geographical region.

In addition, the IC-free subjects were included in the study at their corresponding matched IC subject's index date and should not have reported any history of HZ before the matched IC index date.

### **Herpes Zoster (HZ) Diagnosis**

HZ cases identified in the Clinical Practice Research Datalink (CPRD) database were defined as subjects reporting at least one HZ-related READ code. Incident cases were subjects with at least 12 months of active registration in CPRD and no past record of HZ diagnosis during at least 12 months prior to inclusion or even before in their available medical records. HZ cases were identified in HES using the International Classification of Diseases-10th revision (ICD-10) codes that appeared in the diagnosis fields. If HZ diagnosis codes were recorded in both HES and the CPRD, the earliest event date was considered as the onset date.

**Supplementary Table 1: Post-herpetic neuralgia**

| Source | READ code/ICD-10 code | Complication                                 |
|--------|-----------------------|----------------------------------------------|
| CPRD   | A531.11               | Post-herpetic neuralgia                      |
| CPRD   | A531200               | Post-herpetic trigeminal neuralgia           |
| CPRD   | A531300               | Post-herpetic polyneuropathy                 |
| CPRD   | A531500               | Post-zoster neuralgia                        |
| CPRD   | A531511               | Post-herpetic neuralgia                      |
| CPRD   | F300.00               | Post-herpetic trigeminal neuralgia           |
| HES    | B02.2                 | Zoster with other nervous system involvement |

CPRD, Clinical Practice Research Datalink; HES, Hospital Episode Statistics; ICD-10, International Classifications of Diseases-10<sup>th</sup> revision.

Complications (other than post-herpetic neuralgia [PHN]) were grouped into four main categories for the analyses:

- Neurological (other than PHN): i.e. HZ meningitis, HZ encephalitis, Ramsay - Hunt syndrome;
- Ocular HZ (i.e. HZ eyelid; HZ iridocyclitis, etc);
- Disseminated HZ;
- Other HZ complications (i.e. HZ otitis externa and unspecified complications).

### **Healthcare costing**

- HZ subjects without PHN:
  - Period = the HZ case onset date -7 prior to the case onset date + 30 days (a);
- HZ subjects reporting a PHN event within 365 days from the HZ case onset date, two analyses periods were used:
  - Period 1 = the HZ case onset date -7 prior to the case onset date + 90 days (b);
  - Period 2 = the HZ case onset date -7 prior to the case onset date + 365 days (c);

1  
2  
3 The analysis tables were generated for all HZ subjects from -7 days up to 90 and 365 days  
4 after HZ event; i.e. HZ + PHN 90 Days: (a) + (b), HZ + PHN 365 Days: (a) + (c).  
5  
6

7 Additionally, main categories of resource utilization and cost tables were presented for the  
8 following sub-populations for a 7-day period up to the case onset date up to 30 days, 90 days  
9 and 365 days post-initial HZ onset date:  
10  
11

- 12 • HZ only (i.e. no PHN and no HZ-related complication);
- 13
- 14 • HZ and PHN within 1 year of HZ event;
- 15
- 16 • HZ and other HZ-related complications but no PHN (overall and by complications  
17 sub-categories):
  - 18 ○ Neurological;
  - 19
  - 20 ○ Ocular;
  - 21
  - 22 ○ Cutaneous;
  - 23
  - 24 ○ Other complications.
  - 25
  - 26
  - 27
  - 28
  - 29
  - 30
  - 31

32 A detailed mapping linking the exact event definition variables and criteria to the reference  
33 unit cost was used. The unit costs for each type of resource were obtained from the following  
34 reference sources:  
35  
36

- 37 • General practitioner (GP) prescribed medication costs: British National Formulary  
38 (BNF) 65 and 70. The quantity prescribed and pack type were used to estimate the  
39 prescription costs for each drug (prodcode) of interest. A detailed mapping was used  
40 to link the exact cost of prodcode quantity and packtype for each drug;  
41  
42
- 43 • Primary care costs: Personal Social Services Research Unit (PSSRU, Curtis L,  
44 Personal Social Services Research Unit. Unit costs of Health & Social Care 2014.  
45 University of Kent, 2014);  
46
- 47 • HES inpatient hospitalisation and HES outpatient specialist costs: NHS Tariffs  
48 (National Schedule of Reference Costs, 2013/2014).  
49  
50  
51  
52  
53  
54  
55  
56  
57  
58  
59  
60

**Supplementary Table 2: List of medications**

| <b>Treatment Groups</b>   | <b>Description</b> |
|---------------------------|--------------------|
| Antiviral                 | Aciclovir          |
|                           | Famciclovir        |
|                           | Valacyclovir       |
| NSAIDs                    | Aspirin            |
|                           | Ibuprofen          |
| COX-2                     | Paracetamol        |
| Topical Agents            | Lidocaine          |
|                           | Capsaicin          |
| Anticonvulsants           | Gabapentin         |
|                           | Pregabalin         |
| Tricyclic antidepressants | Amitriptyline      |
|                           | Nortriptyline      |
|                           | Desipramine        |
| Corticosteroids           | Prednisolone       |
| Opioid analgesics         | Tramadol           |
|                           | Morphine           |
|                           | Oxycodone          |
|                           | Methadone          |

**Supplementary Table 3: Ambulatory and Outpatient Costs**

|                                                 | Consultation type             | Details                                                                                                                                                                                                                                   | Tariff Code | Cost |
|-------------------------------------------------|-------------------------------|-------------------------------------------------------------------------------------------------------------------------------------------------------------------------------------------------------------------------------------------|-------------|------|
| AMBULATORY<br>AND OTHER<br>AMBULATORY<br>VISITS | GP surgery<br>consultation    | Per patient contact lasting 11.7 minutes, without qualification costs, excluding direct care staff costs <sup>1</sup>                                                                                                                     | N/A         | £35  |
|                                                 | GP clinic consultation        | Per patient contact lasting 17.2 minutes, without qualification costs, excluding direct care staff costs <sup>1</sup>                                                                                                                     | N/A         | £50  |
|                                                 | GP telephone<br>consultation  | Per patient contact lasting 7.1 minutes, without qualification costs, excluding direct staff care costs <sup>1</sup>                                                                                                                      | N/A         | £21  |
|                                                 | GP home visit                 | Per out of surgery visit lasting 23.4 minutes (including 12 minutes travel) without qualification costs, excluding direct care staff costs <sup>2</sup><br><br>Inflated to 2014 prices using the HCHS annual price inflation <sup>1</sup> | N/A         | £87  |
|                                                 | GP home visit out of<br>hours | Ratio of direct to indirect time; Out of surgery visits (home visits and clinics; includes travel time) - 1:0.99 <sup>2</sup>                                                                                                             | N/A         | £86  |

|                                        | Consultation type                     | Details                                                                                                                                                                                                                                | Tariff Code | Cost |
|----------------------------------------|---------------------------------------|----------------------------------------------------------------------------------------------------------------------------------------------------------------------------------------------------------------------------------------|-------------|------|
|                                        | GP practice nurse consultation        | Per 15.5 minutes surgery consultation @ £44/hour (excluding qualification costs) <sup>1</sup>                                                                                                                                          | N/A         | £11  |
|                                        | GP results by phone                   | Assume same as GP Telephone Consultation<br>Per patient contact lasting 7.1 minutes, without qualification costs, excluding direct staff care costs <sup>1</sup>                                                                       | N/A         | £21  |
|                                        | GP time spent on phone/writing letter | Ratio of direct to indirect time; Face-to-face time (excludes travel time). Using cost of GP consultation in surgery <sup>1</sup>                                                                                                      | N/A         | £23  |
|                                        | GP time on administration             | Ratio of direct to indirect time; Face-to-face time (excludes travel time). Using cost of GP consultation in surgery <sup>1</sup>                                                                                                      | N/A         | £8   |
| AMBULATORY AND OTHER AMBULATORY VISITS | District nurse visit                  | Mean average cost for a face-to-face contact in district nursing services (based on NHS reference costs) was £39 in 2012/2013 <sup>2</sup><br>Hospital and community health services annual price inflation for 2013/2014 <sup>1</sup> | N/A         | £40  |

|                                      | Consultation type                          | Details                                                                                                                                                                                                                                       | Tariff Code | Cost |
|--------------------------------------|--------------------------------------------|-----------------------------------------------------------------------------------------------------------------------------------------------------------------------------------------------------------------------------------------------|-------------|------|
|                                      | Health visitor visit                       | Mean average cost for a face-to-face contact in health visiting services (based on NHS reference costs) was £51 in for 2012/2013 <sup>2</sup><br><br>Hospital and community health services annual price inflation for 2013/2014 <sup>1</sup> | N/A         | £52  |
| OUTPATIENT<br>HOSPITAL<br>ATTENDANCE | Anaesthetics,<br>outpatient attendance     | Consultant Led; WF01B: First attendance Single professional <sup>3</sup>                                                                                                                                                                      | 190         | £125 |
|                                      | Dermatology,<br>outpatient attendance      | Consultant Led; WF01B: First attendance Single professional <sup>3</sup>                                                                                                                                                                      | 330         | £104 |
|                                      | General Medicine,<br>Outpatient Attendance | Consultant Led; WF01B: First attendance Single professional <sup>3</sup>                                                                                                                                                                      | 300         | £178 |
|                                      | Ophthalmology,<br>Outpatient Attendance    | Consultant Led; WF01B: First attendance Single professional <sup>3</sup>                                                                                                                                                                      | 130         | £119 |

|  | <b>Consultation type</b>                  | <b>Details</b>                                                    | <b>Tariff Code</b> | <b>Cost</b> |
|--|-------------------------------------------|-------------------------------------------------------------------|--------------------|-------------|
|  | A&E Attendance                            | Category 3 investigation with category 1-3 treatment <sup>3</sup> | VB03Z              | £163        |
|  | Pain Management,<br>Outpatient Attendance | Consultant led - Outpatient Attendance <sup>4</sup>               | 191                | £138        |

For peer review only



1  
2  
3  
4  
5  
6  
7  
8  
9  
10  
11  
12  
13  
14  
15  
16  
17  
18  
19  
20  
21  
22  
23  
24  
25  
26  
27  
28  
29  
30  
31  
32  
33  
34  
35  
36  
37  
38  
39  
40  
41  
42  
43  
44  
45  
46

|                                      | <b>Consultation type</b>                      | <b>Details</b>                                      | <b>Tariff Code</b> | <b>Cost</b> |
|--------------------------------------|-----------------------------------------------|-----------------------------------------------------|--------------------|-------------|
| OUTPATIENT<br>HOSPITAL<br>ATTENDANCE | Neurosurgery,<br>Outpatient Attendance        | Consultant led - Outpatient Attendance <sup>4</sup> | 150                | £182        |
|                                      | Palliative Medicine,<br>Outpatient Attendance | Consultant led - Outpatient Attendance <sup>4</sup> | 315                | £167        |
|                                      | Neurology, Outpatient<br>Attendance           | Consultant led - Outpatient Attendance <sup>4</sup> | 400                | £174        |

GP, General Practitioner; N/A, not available; NHS, National Health Service; HCHS, community health services; A&E, accident and emergency;  
Source:

1. Curtis L, Personal Social Services Research Unit. Unit costs of Health & Social Care 2014. University of Kent, 2014.
2. Curtis L, Personal Social Services Research Unit. Unit costs of Health & Social Care 2013. University of Kent, 2013
3. 2014/5 National Tariff Payment System. Annex 5A National Prices, 17 December 2013  
<https://www.gov.uk/government/publications/national-tariff-payment-system-2014-to-2015>
4. National Schedule of Reference costs 2013-14  
[https://www.gov.uk/government/uploads/system/uploads/attachment\\_data/file/397469/03a\\_2013-14\\_National\\_Schedule\\_-\\_CF-NET\\_updated.xls](https://www.gov.uk/government/uploads/system/uploads/attachment_data/file/397469/03a_2013-14_National_Schedule_-_CF-NET_updated.xls)

**Supplementary Table 4: Hospital Inpatient costs**

| Diagnosis Code | Detail                                  | Average tariff per admission |
|----------------|-----------------------------------------|------------------------------|
| B020           | Zoster encephalitis                     | £5,038.39                    |
| B021           | Zoster meningitis                       | £2,065.47                    |
| B022           | Zoster other nervous system involvement | £1,440.48                    |
| B023           | Zoster with ocular diseases             | £2,226.36                    |
| B027           | Disseminated Zoster                     | £2,255.30                    |
| B028           | Zoster with other complications         | £2,060.70                    |
| B029           | Zoster without complications            | £1,790.57                    |

Source: Hospital Episode Statistics (HES) Admission data IMS, 2013/14

### **HZ treatment prescriptions**

All HZ treatment prescriptions, defined according to British National Formulary (BNF) indication and clinical expert input, were identified by product codes from the HZ TREATMENT CPRD Prodcodes List, and were extracted from the CPRD Therapy dataset.

### **Analysis datasets used**

#### ***The Clinical Practice Research Datalink (CPRD)-GOLD 2014Q3;***

- HZ treatments prescriptions (CPRD Therapy dataset);
- CPRD Ambulatory Visits (CPRD Consultation dataset);
- Specialists Referrals by GP (CPRD Referral dataset);
- Nursing home visits and Time off sick (CPRD Clinical dataset).

1  
2  
3 The CPRD GOLD, referred to as CPRD, is a large computerised database of linked  
4 anonymised longitudinal medical records from primary care in the UK, drawn from General  
5 Practitioners' (GPs') computer systems used for clinical records in their practices. At the time  
6 of data extraction, the CPRD included data from 15,436,637 subjects from 684 practices in  
7 the UK. The population in the database matched the age and gender distribution of the UK  
8 population as a whole. Mean follow-up of subjects was approximately 7 years (median 5.0  
9 years).

10  
11  
12 Information in the CPRD includes records of clinical events (medical diagnoses), referrals to  
13 secondary care and specialists, primary care prescriptions, immunisations and vaccinations,  
14 diagnostic tests, lifestyle (smoking and alcohol status) as well as that related to other routine  
15 General Practitioner (GP) medical services. More recently the CPRD was linked to certain  
16 key secondary care data and mortality data from the ONS.

17  
18  
19 READ codes comprise coded clinical terms used by clinicians to record outputs of patient  
20 assessments as well as health and social care procedures. Medical codes used in CPRD,  
21 referred to as medcodes, are CPRD-generated numerical representations of alphanumeric  
22 READ codes and are used to identify medical diagnoses in the database.

### 23 24 25 26 *The Hospital Episode Statistics*

27  
28 HES inpatient Set 9 (2013Q3);

- 29 • Hospitalizations (HES Inpatient: HES\_DIAGNOSIS\_EPI dataset);

30  
31 HES outpatient Set 9;

- 32 • Outpatient Visits (HESOP Clinical dataset);

33  
34 At the time of data extraction, HES included information related to inpatient admissions,  
35 outpatient and accident & emergency activity in NHS (National Health Service) hospitals that  
36 were restricted to England only. Records are collated from over 125 million patients annually.  
37 ICD-10 clinical coding is used to record diagnoses in HES.

38  
39 Records for approximately 60% of patients registered in GP practices in CPRD are eligible  
40 for linking with their HES records. Record linkage is dependent on agreement by the GP and  
41 is limited to subjects in CPRD with a valid NHS number in England.

42  
43 A combination of the subject's NHS number, gender, date of birth and postcode is used to  
44 link patient records. This process is managed by an independent party to HES and CPRD.

45  
46 A large proportion of subjects with IC conditions and HZ-related or potential complications  
47 received care in a hospital setting at some point during their disease history. Although,  
48 generally, communication from hospitals (e.g. via discharge letters) inform GPs about care  
49 received by their patients, not all of these events are encoded by GPs in patients' notes and  
50 therefore there are discrepancies between the CPRD and HES-linked data.  
51  
52  
53  
54  
55  
56  
57  
58  
59  
60

**Supplementary Table 5: Costs by category, IC status, time period of analysis and age Groups**

| Category                             | 18-49<br>YOA | 50-59<br>YOA | 60-64<br>YOA | 65-69<br>YOA | 70-79<br>YOA | ≥80<br>YOA   |
|--------------------------------------|--------------|--------------|--------------|--------------|--------------|--------------|
| <b>IC Population (≤90 days)</b>      |              |              |              |              |              |              |
| Hospitalizations                     | 44.2         | 52.4         | 66.7         | 61.2         | 89.3         | 205.5        |
| HES outpatient consultations/visits  | 12.4         | 11.2         | 17.8         | 18.6         | 21           | 21.3         |
| CPRD ambulatory visits               | 72.9         | 82.3         | 92.1         | 97.5         | 110.8        | 126.5        |
| CPRD other ambulatory visits         | 16.1         | 22           | 27.7         | 31           | 34.6         | 41.8         |
| CPRD prescriptions                   | 27.6         | 31.1         | 31.9         | 33.3         | 33.9         | 31.9         |
| <b>Total</b>                         | <b>173.2</b> | <b>199.0</b> | <b>236.2</b> | <b>241.6</b> | <b>289.6</b> | <b>427.0</b> |
| <b>IC Population (≤365 days)</b>     |              |              |              |              |              |              |
| Hospitalizations                     | 44.2         | 56.7         | 68           | 62.4         | 93.8         | 216.5        |
| HES outpatient consultations/visits  | 15.1         | 16.1         | 23.9         | 28.1         | 34.4         | 40.1         |
| CPRD ambulatory visits               | 80.6         | 100.1        | 120.2        | 134.5        | 158.1        | 180.8        |
| CPRD other ambulatory visits         | 20.7         | 31.6         | 44.9         | 54.4         | 63.2         | 78.8         |
| CPRD prescriptions                   | 28.7         | 33.3         | 37.3         | 38.1         | 42.2         | 40.8         |
| <b>Total</b>                         | <b>189.3</b> | <b>237.8</b> | <b>294.2</b> | <b>317.4</b> | <b>391.7</b> | <b>557.0</b> |
| <b>IC-Free Population (≤90 days)</b> |              |              |              |              |              |              |
| Hospitalizations                     | 6.3          | 8.5          | 11.5         | 17.5         | 36.4         | 136.5        |
| HES outpatient consultations/visits  | 5.2          | 7.8          | 8.2          | 10.4         | 13.9         | 18.2         |
| CPRD ambulatory visits               | 59           | 66.7         | 69.6         | 72.7         | 88.8         | 102.8        |
| CPRD other ambulatory visits         | 8            | 11.2         | 12.9         | 16.9         | 21.2         | 32.8         |
| CPRD prescriptions                   | 19.7         | 24.7         | 24.6         | 28           | 29.4         | 29.4         |
| <b>Total</b>                         | <b>98.2</b>  | <b>118.9</b> | <b>126.8</b> | <b>145.5</b> | <b>189.7</b> | <b>319.7</b> |

| <b>IC-Free Population (<math>\leq 365</math> days)</b> |              |              |              |              |              |              |
|--------------------------------------------------------|--------------|--------------|--------------|--------------|--------------|--------------|
| Hospitalizations                                       | 6.3          | 8.9          | 12           | 17.9         | 37           | 144          |
| HES outpatient consultations/visits                    | 5.7          | 10.8         | 10           | 13.4         | 22.7         | 28.4         |
| CPRD ambulatory visits                                 | 63           | 75.8         | 80.4         | 90           | 117.3        | 135.9        |
| CPRD other ambulatory visits                           | 8.8          | 14.2         | 18.6         | 23.2         | 36.8         | 58.7         |
| CPRD prescriptions                                     | 20           | 25.6         | 26.8         | 29.9         | 34.9         | 34.1         |
| <b>Total</b>                                           | <b>103.8</b> | <b>135.3</b> | <b>147.7</b> | <b>174.4</b> | <b>248.6</b> | <b>401.0</b> |

HES, Hospital Episode Statistics; IC, immunocompromised; CPRD, Clinical Practice Research Datalink; CPRD; YOA, years of age

**Supplementary Figure 1: Healthcare costs for by HES-linked matched IC (Panel A) and IC-free cohort (Panel B) for the analysis period 7 days prior to 90 days post initial HZ onset**

**Panel A**

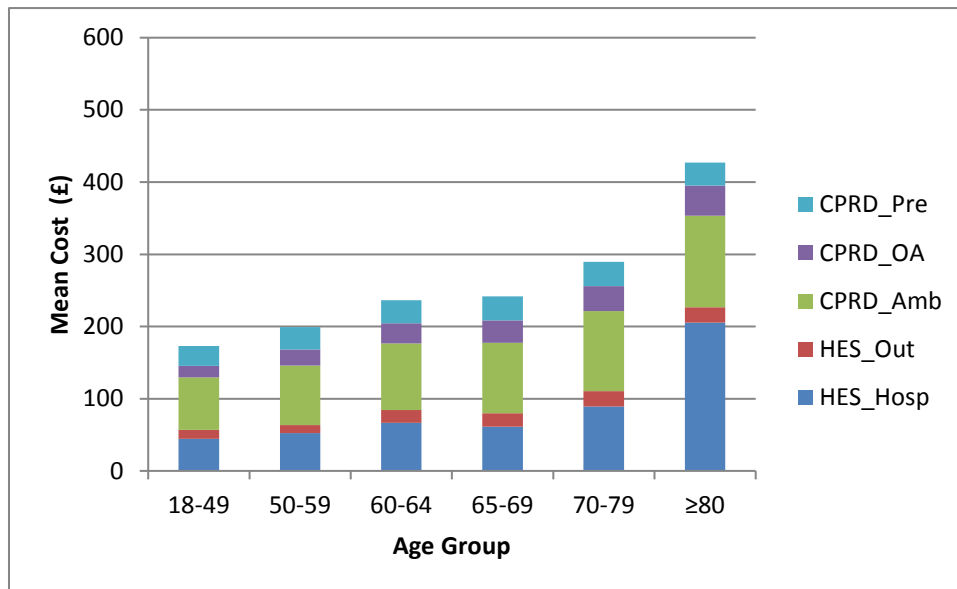

**Panel B**

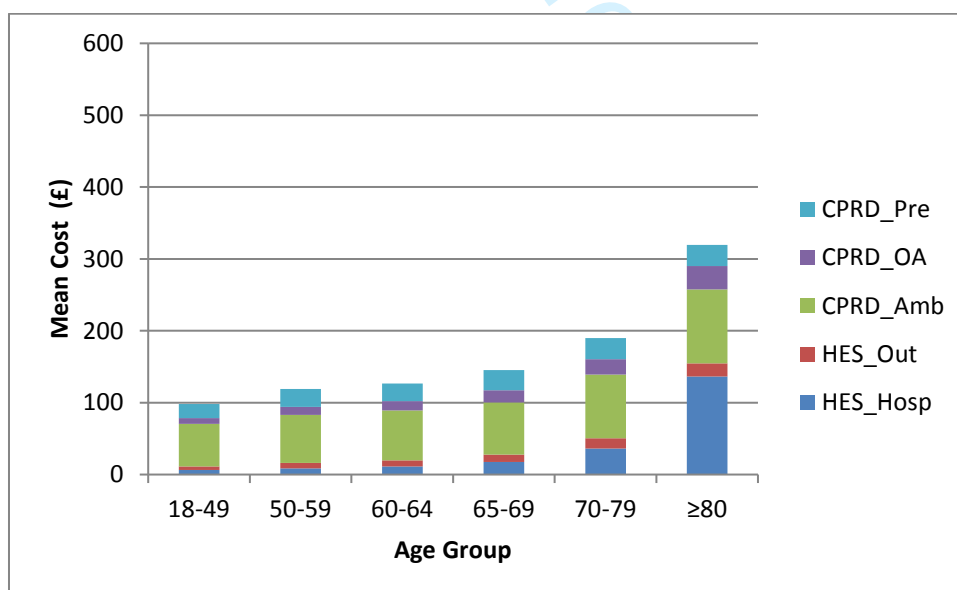

For HZ subjects without PHN: data from 7 days prior to 30 days post HZ onset included;

For HZ subjects with PHN: data from 7 days prior to 90 days post HZ onset included;

Abbreviations: HES, Hospital Episode Statistics; IC, immunocompromised; HZ, herpes zoster; PHN, post-herpetic neuralgia; CPRD, Clinical Practice Research Datalink; CPRD\_Pre, CPRD Prescriptions; CPRD\_OA, CPRD Other Ambulatory Visits; CPRD\_Amb, CPRD Ambulatory Visits; HES\_Out, HES Outpatient consultation; HES\_Hosp, HES Hospital admission.

## Supplementary Figure 2: Healthcare Costs for each IC condition by age group for the analysis period 7 days prior to 90 days post initial HZ onset

### Panel A

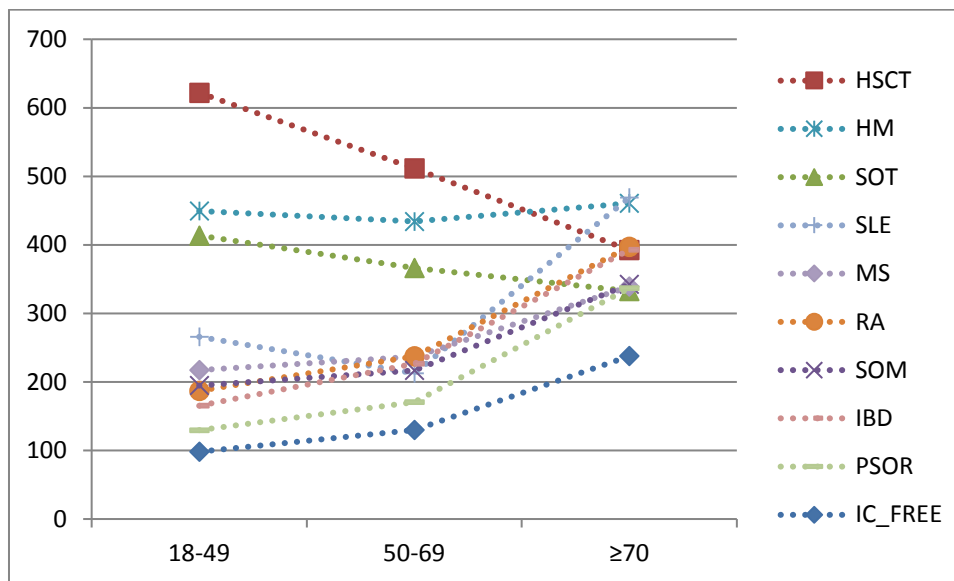

### Panel B

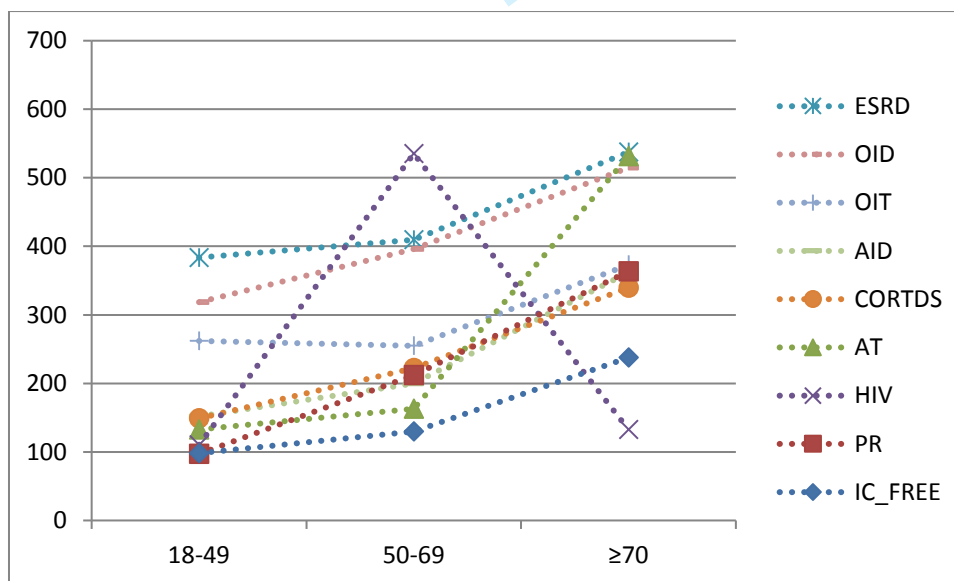

For HZ subjects without PHN: data from 7 days prior to 30 days post HZ onset included;  
 For HZ subjects with PHN: data from 7 days prior to 90 days post HZ onset included;

Abbreviations: HES, Hospital Episode Statistics; IC, immunocompromised; HZ, herpes zoster; PHN, post-herpetic neuralgia; HSCT, hematopoietic stem cell transplantation; HM, haematological malignancies; SOT, solid organ transplantations; SLE, systemic lupus erythematosus; MS, multiple sclerosis; RA, rheumatoid arthritis; SOM, solid organ malignancies; IBD, inflammatory bowel syndrome; PSOR, psoriasis; ESRD, end-stage renal disease; OID, other immunodeficiency; OIT, other immunosuppressive therapy; AID, autoimmune diseases; CORTDS, corticosteroid exposure; AT, autoimmune thyroiditis; HIV, human immunodeficiency virus; PR, polymyalgia rheumatica.

**Supplementary Table 6: Non-HZ related Hospital Inpatient Stay for the period 7 days to 365 days post initial-HZ onset**

| Age groups<br>(YOA) | IC cohort     |               |              |             | IC-free cohort |              |              |             |
|---------------------|---------------|---------------|--------------|-------------|----------------|--------------|--------------|-------------|
|                     | N             | Events        | Subjects     | Mean        | N              | Events       | Subjects     | Mean        |
| 18-49               | 3,039         | 1,881         | 259          | 0.62        | 2,078          | 193          | 56           | 0.09        |
| 50-59               | 3,408         | 3,267         | 337          | 0.96        | 2,834          | 251          | 61           | 0.09        |
| 60-64               | 2,550         | 2,897         | 293          | 1.14        | 2,308          | 309          | 63           | 0.13        |
| 65-69               | 2,753         | 3,867         | 371          | 1.40        | 2,658          | 434          | 108          | 0.16        |
| 70-79               | 5,429         | 9,020         | 838          | 1.66        | 5,454          | 2,556        | 379          | 0.47        |
| ≥80                 | 3,863         | 9,928         | 840          | 2.57        | 3,171          | 4,119        | 457          | 1.30        |
| <b>Total</b>        | <b>21,042</b> | <b>30,860</b> | <b>2,938</b> | <b>1.47</b> | <b>18,503</b>  | <b>7,862</b> | <b>1,124</b> | <b>0.42</b> |

Abbreviations: IC, immunocompromised; HZ, herpes zoster; N, number of participant; YOA, years of age



## STROBE Statement—checklist of items that should be included in reports of observational studies

|                           | Item No | Recommendation                                                                                                                                                                                                                                                                                                                                                                                                                                                                                                                                                                                                                                                                                   |                              |
|---------------------------|---------|--------------------------------------------------------------------------------------------------------------------------------------------------------------------------------------------------------------------------------------------------------------------------------------------------------------------------------------------------------------------------------------------------------------------------------------------------------------------------------------------------------------------------------------------------------------------------------------------------------------------------------------------------------------------------------------------------|------------------------------|
| <b>Title and abstract</b> | 1       | (a) Indicate the study's design with a commonly used term in the title or the abstract<br>(b) Provide in the abstract an informative and balanced summary of what was done and what was found                                                                                                                                                                                                                                                                                                                                                                                                                                                                                                    | Pages 1 and 2,3<br>Pages 2,3 |
| <b>Introduction</b>       |         |                                                                                                                                                                                                                                                                                                                                                                                                                                                                                                                                                                                                                                                                                                  |                              |
| Background/rationale      | 2       | Explain the scientific background and rationale for the investigation being reported                                                                                                                                                                                                                                                                                                                                                                                                                                                                                                                                                                                                             | Page 5,6                     |
| Objectives                | 3       | State specific objectives, including any prespecified hypotheses                                                                                                                                                                                                                                                                                                                                                                                                                                                                                                                                                                                                                                 | Page 6                       |
| <b>Methods</b>            |         |                                                                                                                                                                                                                                                                                                                                                                                                                                                                                                                                                                                                                                                                                                  |                              |
| Study design              | 4       | Present key elements of study design early in the paper                                                                                                                                                                                                                                                                                                                                                                                                                                                                                                                                                                                                                                          | Page 6,7                     |
| Setting                   | 5       | Describe the setting, locations, and relevant dates, including periods of recruitment, exposure, follow-up, and data collection                                                                                                                                                                                                                                                                                                                                                                                                                                                                                                                                                                  | Pages 6-8                    |
| Participants              | 6       | (a) <i>Cohort study</i> —Give the eligibility criteria, and the sources and methods of selection of participants. Describe methods of follow-up<br><i>Case-control study</i> —Give the eligibility criteria, and the sources and methods of case ascertainment and control selection. Give the rationale for the choice of cases and controls<br><i>Cross-sectional study</i> —Give the eligibility criteria, and the sources and methods of selection of participants<br>(b) <i>Cohort study</i> —For matched studies, give matching criteria and number of exposed and unexposed<br><i>Case-control study</i> —For matched studies, give matching criteria and the number of controls per case | Page 6                       |
| Variables                 | 7       | Clearly define all outcomes, exposures, predictors, potential confounders, and effect modifiers. Give diagnostic criteria, if applicable                                                                                                                                                                                                                                                                                                                                                                                                                                                                                                                                                         | Pages 8,9                    |
| Data sources/measurement  | 8*      | For each variable of interest, give sources of data and details of methods of assessment (measurement). Describe comparability of assessment methods if there is more than one group                                                                                                                                                                                                                                                                                                                                                                                                                                                                                                             | Pages 8,9                    |
| Bias                      | 9       | Describe any efforts to address potential sources of bias                                                                                                                                                                                                                                                                                                                                                                                                                                                                                                                                                                                                                                        | Page 9                       |
| Study size                | 10      | Explain how the study size was arrived at                                                                                                                                                                                                                                                                                                                                                                                                                                                                                                                                                                                                                                                        | Pages 9,10                   |
| Quantitative variables    | 11      | Explain how quantitative variables were handled in the analyses. If applicable, describe which groupings were chosen and why                                                                                                                                                                                                                                                                                                                                                                                                                                                                                                                                                                     | Pages 8,9                    |
| Statistical methods       | 12      | (a) Describe all statistical methods, including those used to control for confounding<br>(b) Describe any methods used to examine subgroups and interactions<br>(c) Explain how missing data were addressed<br>(d) <i>Cohort study</i> —If applicable, explain how loss to follow-up was addressed<br><i>Case-control study</i> —If applicable, explain how matching of cases and controls was addressed                                                                                                                                                                                                                                                                                         | N/A                          |

*Cross-sectional study*—If applicable, describe analytical methods taking account of sampling strategy  
 (e) Describe any sensitivity analyses

| <b>Results</b>           |     |                                                                                                                                                                                                                                                                                                                                                                                                               |             |
|--------------------------|-----|---------------------------------------------------------------------------------------------------------------------------------------------------------------------------------------------------------------------------------------------------------------------------------------------------------------------------------------------------------------------------------------------------------------|-------------|
| Participants             | 13* | (a) Report numbers of individuals at each stage of study—eg numbers potentially eligible, examined for eligibility, confirmed eligible, included in the study, completing follow-up, and analysed<br>(b) Give reasons for non-participation at each stage<br>(c) Consider use of a flow diagram                                                                                                               | Pages 9,10  |
| Descriptive data         | 14* | (a) Give characteristics of study participants (eg demographic, clinical, social) and information on exposures and potential confounders<br>(b) Indicate number of participants with missing data for each variable of interest<br>(c) <i>Cohort study</i> —Summarise follow-up time (eg, average and total amount)                                                                                           | N/A         |
| Outcome data             | 15* | <i>Cohort study</i> —Report numbers of outcome events or summary measures over time<br><i>Case-control study</i> —Report numbers in each exposure category, or summary measures of exposure<br><i>Cross-sectional study</i> —Report numbers of outcome events or summary measures                                                                                                                             | N/A         |
| Main results             | 16  | (a) Give unadjusted estimates and, if applicable, confounder-adjusted estimates and their precision (eg, 95% confidence interval). Make clear which confounders were adjusted for and why they were included<br>(b) Report category boundaries when continuous variables were categorized<br>(c) If relevant, consider translating estimates of relative risk into absolute risk for a meaningful time period | N/A         |
| Other analyses           | 17  | Report other analyses done—eg analyses of subgroups and interactions, and sensitivity analyses                                                                                                                                                                                                                                                                                                                | Pages 10,11 |
| <b>Discussion</b>        |     |                                                                                                                                                                                                                                                                                                                                                                                                               |             |
| Key results              | 18  | Summarise key results with reference to study objectives                                                                                                                                                                                                                                                                                                                                                      | Page 11,12  |
| Limitations              | 19  | Discuss limitations of the study, taking into account sources of potential bias or imprecision. Discuss both direction and magnitude of any potential bias                                                                                                                                                                                                                                                    | Pages 14    |
| Interpretation           | 20  | Give a cautious overall interpretation of results considering objectives, limitations, multiplicity of analyses, results from similar studies, and other relevant evidence                                                                                                                                                                                                                                    | Pages 14    |
| Generalisability         | 21  | Discuss the generalisability (external validity) of the study results                                                                                                                                                                                                                                                                                                                                         | Pages 12,13 |
| <b>Other information</b> |     |                                                                                                                                                                                                                                                                                                                                                                                                               |             |
| Funding                  | 22  | Give the source of funding and the role of the funders for the present study and, if applicable, for the original study on which the present article is based                                                                                                                                                                                                                                                 | Page 15     |

\*Give information separately for cases and controls in case-control studies and, if applicable, for exposed and unexposed groups in cohort and cross-sectional studies.

**Note:** An Explanation and Elaboration article discusses each checklist item and gives methodological background and published examples of transparent reporting. The STROBE checklist is best used in conjunction with this article (freely available on the Web sites of PLoS Medicine at <http://www.plosmedicine.org/>, Annals of Internal Medicine at <http://www.annals.org/>, and Epidemiology at <http://www.epidem.com/>). Information on the STROBE Initiative is available at [www.strobe-statement.org](http://www.strobe-statement.org).
